# Supplementary material for: Rhodium-Catalyzed Tandem Asymmetric Allylic Decarboxylative Addition and Cyclization of Vinylethylene Carbonates with N-Nosylimines
Source: MDPI journal article supplement (doi:10.3390/molecules29051019), 2024-02-26
Supplement: s1 [file s1]

## Supporting Information

# Rhodium-Catalyzed Tandem Asymmetric Allylic Decarboxylative Addition and Cyclization of Vinylethylene Carbonates with N-Nosylimines

Xiao-Lin Wang, Hai-Bin Jiang, Sheng-Cai Zheng \* and Xiao-Ming Zhao \*

School of Chemical Science and Engineering, Tongji University, 1239 Siping Road, Shanghai 200092, China; 1810923@tongji.edu.cn (X.-L.W.); haibin@tongji.edu.cn (H.-B.J.)

\* Correspondence: zhengsc@tongji.edu.cn (S.-C.Z.); xmzhao08@mail.tongji.edu.cn (X.-M.Z.)

## Table of Contents

|                                                                                                |     |
|------------------------------------------------------------------------------------------------|-----|
| 1. General .....                                                                               | S2  |
| 2. Preparation of Ligand <b>L1-L5</b> .....                                                    | S2  |
| 3. General procedures for the synthesis of <i>N</i> -nosylimine <b>2</b> .....                 | S6  |
| 4. General procedure for the synthesis of <b>3</b> .....                                       | S6  |
| 5. General procedure for the synthesis of <b>4</b> and <b>5</b> .....                          | S12 |
| 6. X-ray crystallographic information of <b>3b</b> .....                                       | S13 |
| 7. Copies of NMR spectra of compounds <b>L1-L6</b> , <b>3/3'</b> , <b>4</b> and <b>5</b> ..... | S15 |
| 8. HPLC Spectra of compounds <b>3/3'</b> , <b>4</b> and <b>5</b> .....                         | S51 |
| 9. References .....                                                                            | S73 |

## 1. General

All manipulations were carried out under the argon atmosphere using standard Schlenk techniques. All glassware was oven or flame dried immediately prior to use. All solvents were purified and dried according to standard methods prior to use, unless stated otherwise.

$^1\text{H}$  NMR spectra were obtained at 400 MHz or 600 MHz and recorded relative to the tetramethylsilane signal (0 ppm) or residual protio-solvent (7.26 ppm for  $\text{CDCl}_3$ , 1.94 ppm for  $\text{CD}_3\text{CN}$ ).  $^{13}\text{C}$  NMR spectra were obtained at 101 MHz or 151 MHz, and chemical shifts were recorded relative to the solvent resonance ( $\text{CDCl}_3$ , 77.16 ppm,  $\text{CD}_3\text{CN}$ , 1.32 ppm). Data for NMR are recorded as follows: chemical shift ( $\delta$ , ppm), multiplicity (s = singlet, d = doublet, t = triplet, m = multiplet or unresolved, br = broad singlet, coupling constant(s) in Hz, integration). Infrared spectra were recorded on Nicolet FT-IR spectrometers. The accurate masses were measured by ESI-TOF using QTOF Ultima, G2-xs TOF from Waters, and microflex LRF MALDI-TOF. Optical rotations  $\alpha_D$  were obtained with AUTOPOL VI from rudolph-research-analytical. HPLC using chiral stationary phase columns by comparing the samples with the appropriate racemic samples, column and elution details specified in each entry.

## 2. Preparation of Ligand L1-L5

### 1) Procedure for the synthesis of chiral ligands L1

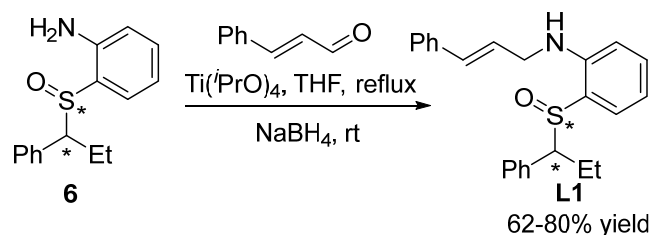

An oven-dried round-bottomed flask equipped with a magnetic stir bar was charged with **6**<sup>[1]</sup> (0.5 mmol),  $\alpha$ ,  $\beta$ -unsaturated aldehyde (0.6 mmol, 1.2 equiv.),  $\text{Ti}(\text{iPrO})_4$  (1.0 mmol, 2.0 equiv.) and anhydrous tetrahydrofuran (5.0 mL) under argon atmosphere. The solution was refluxed in an oil bath for 2h and successively cooled down to room temperature. Then  $\text{NaBH}_4$  (2.0 mmol, 4.0 equiv.) was added into the mixture. After stirring for 2h, the reaction was quenched with MeOH and  $\text{H}_2\text{O}$ . The organic layer was extracted by ethyl acetate, dried over anhydrous sodium sulfate, filtered, and concentrated in vacuo. The crude residue was purified by flash column chromatography (PE/EA = 10/1) to provide **L1** in 75% yield (140.7 mg).

**N-Cinnamyl-2-((S)-((S)-1-phenylpropyl)sulfinyl)aniline (L1):** White solid; m.p. 105.0 – 105.6 °C; 75% yield (140.7 mg); 99% *ee*.  $[\alpha]_{\text{D}}^{20} = -97.7^\circ$  (c 1.0,  $\text{CHCl}_3$ ). **HPLC:** [Daicel

CHIRALCEL AD-H (0.46 cm x 25 cm); hexane/2-propanol = 90/10; flow rate = 1.2 mL/min; detection wavelength = 214 nm;  $t_R$  = 11.286 (major), 21.328 (minor) min]. **<sup>1</sup>H NMR** (600 MHz, CDCl<sub>3</sub>)  $\delta$  7.35 (d,  $J$  = 7.4 Hz, 2H), 7.33 – 7.27 (m, 5H), 7.26 – 7.21 (m, 2H), 7.18 – 7.12 (m, 2H), 7.03 (d,  $J$  = 7.4 Hz, 1H), 6.66 – 6.57 (m, 2H), 6.53 (d,  $J$  = 16.0 Hz, 1H), 6.30 (s, 1H), 6.15 (dt,  $J$  = 15.8, 5.4 Hz, 1H), 4.10 (dd,  $J$  = 9.5, 6.2 Hz, 1H), 3.79 – 3.66 (m, 2H), 2.09 – 1.95 (m, 2H), 0.90 (t,  $J$  = 7.3 Hz, 3H). **<sup>13</sup>C NMR** (100 MHz, CDCl<sub>3</sub>)  $\delta$  149.5, 136.9, 133.9, 132.5, 131.2, 129.7, 128.6, 128.4, 128.3, 127.8, 127.6, 126.5, 126.4, 119.7, 115.6, 111.9, 69.6, 45.2, 22.5, 11.9. **IR** (KBr):  $\nu_{\max}$  (cm<sup>-1</sup>) = 3260, 3062, 3006, 2992, 2969, 2882, 1590, 1489, 1293, 1120, 1045, 745, 650. **HRMS** (ESI<sup>+</sup>) calcd for C<sub>24</sub>H<sub>25</sub>NNaOS [M+Na]<sup>+</sup>: 398.1549, Found: 398.1554.

## 2) Procedure for the synthesis of chiral ligands **L2**<sup>[2]</sup>

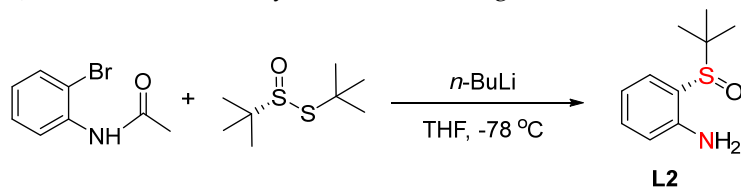

A stirred solution of 2'-bromoacetanilide (428mg, 2 mmol, 1 equiv.) in 3 mL of anhydrous THF was cooled to -78 °C. To this solution was added *n*-BuLi (2.8 mL, 2.2 mmol, 1.55 M in hexane, 2.2 equiv.) dropwise while maintaining the temperature below -70 °C. The resulting yellow mixture was stirred at -78 °C during 2 h, before slow addition of a solution of 2-[(*R*)-tert-butylsulfinyl]sulfanyl]-2-methylpropane (426 mg, 1.1 mmol, 1.1 equiv.) in 1 mL of anhydrous THF. The resulting strong yellow mixture was further stirred 1h at -78 °C. MeOH (few drops) was added. The mixture was allowed to warm to 0 °C and sat. NH<sub>4</sub>Cl saturated solution (3 mL) was added. The mixture was extracted with diethyl ether (5 mL), washed with brine (3 mL), dried (Na<sub>2</sub>SO<sub>4</sub>), filtered off and evaporated under reduced pressure. The crude material was dissolved in 3 mL of EtOH. KOH (solution in water) (560 mg, 5 mmol, 5 equiv.) was added and the mixture was stirred in a sealed vial overnight at 85 °C. The orange solution was cooled to room temperature and ethanol was evaporated under reduced pressure. Diethyl ether (5 mL) and water (5 mL) were added. The organic layer was extracted, washed with brine (5 mL), dried (Na<sub>2</sub>SO<sub>4</sub>), filtered off and evaporated under reduced pressure. The crude was purified by column chromatography on silica gel with Petroleum/EtOAc (10/1) to afford **L2** (224 mg, 59 % yield).

### (*S*)-2-(tert-Butylsulfinyl) aniline (**L2**):

Yellow solid; 59% yield; *ee*: 99%. [ $\alpha$ ]<sub>D</sub><sup>20</sup> = +58.9 (c 1.0, CHCl<sub>3</sub>). **HPLC**: [Daicel CHIRALCEL OD-H (0.46 cm x 25 cm); *n*-hexane/2-propanol = 90/10; flow rate = 1.0 mL/min; detection wavelength = 214 nm;  $t_R$  = 11.39 (major), 13.28 (minor) min]. **<sup>1</sup>H NMR** (600 MHz, CDCl<sub>3</sub>)  $\delta$  7.19 (t,  $J$  = 8.3 Hz, 1H), 7.08 (d,  $J$  = 6.9 Hz, 1H), 6.69 (t,  $J$  = 7.4 Hz, 1H), 6.61 (d,  $J$  = 8.2 Hz, 1H), 5.15 (s, 2H), 1.29 (s, 9H). **<sup>13</sup>C NMR** (150 MHz, CDCl<sub>3</sub>)  $\delta$  149.4, 131.8, 128.9, 117.8, 117.6, 116.4, 58.8, 23.5. **IR** (KBr):  $\nu_{\max}$  (cm<sup>-1</sup>) = 3411, 3143, 3005, 2986, 1642, 1614, 1401, 1281, 1263, 767, 752. **HRMS** (ESI<sup>+</sup>) calcd for C<sub>10</sub>H<sub>15</sub>NNaOS [M+Na]<sup>+</sup>: 220.0767, Found: 220.0772.

3) Procedure for the synthesis of chiral ligands **L3**

**L3** was similarly prepared from the general procedure for preparing **L1**.

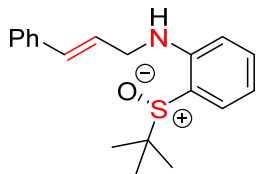

**(S)-2-(tert-Butylsulfinyl)-N-cinnamylaniline (L3)**: Pale yellow wax; 36% yield (22.5 mg); *ee*: 97%.  $[\alpha]_D^{20} = -28.8$  (c 1.0, CHCl<sub>3</sub>). **HPLC**: [Daicel CHIRALCEL OD-H (0.46 cm × 25 cm); *n*-hexane/2-propanol = 90/10; flow rate = 1.0 mL/min; detection wavelength = 254 nm; *t<sub>R</sub>* = 11.42 (minor), 13.94 (major) min]. **<sup>1</sup>H NMR** (400 MHz, CDCl<sub>3</sub>) δ 7.41 – 7.36 (m, 2H), 7.36 – 7.29 (m, 2H), 7.29 – 7.21 (m, 2H), 7.18 – 7.11 (m, 1H), 7.08 (dd, *J* = 7.7, 1.6 Hz, 1H), 6.71 (dd, *J* = 8.4, 1.1 Hz, 1H), 6.69 – 6.58 (m, 2H), 6.33 – 6.23 (m, 1H), 3.95 (t, *J* = 5.4 Hz, 2H), 1.33 (s, 9H). **<sup>13</sup>C NMR** (100 MHz, CDCl<sub>3</sub>) δ 150.8, 136.8, 132.3, 131.2, 129.1, 128.5, 127.4, 126.5, 126.3, 116.6, 114.9, 112.1, 58.8, 45.2, 23.7. **IR** (KBr):  $\nu_{\max}$  (cm<sup>-1</sup>) = 3410, 3122, 3001, 2917, 1634, 1621, 1411, 1271, 1253, 759, 747. **HRMS** (ESI<sup>+</sup>) calcd for C<sub>19</sub>H<sub>23</sub>NNaOS [M+Na]<sup>+</sup>: 336.1393, Found: 336.1380.

4) Procedure for the synthesis of chiral ligands **L4**<sup>[3]</sup>

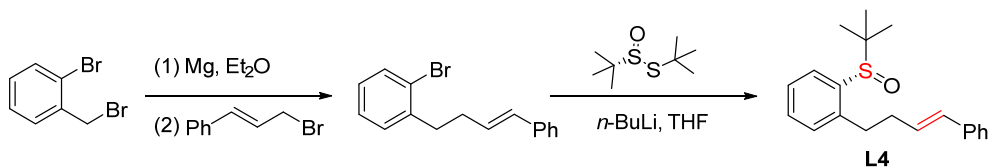

In a three necked flask equipped with a condenser and a dropping funnel are introduced: magnesium (0.389 g; 15.8 mmol), Et<sub>2</sub>O (12 mL) and one crystal of I<sub>2</sub>. From the dropping funnel was added slowly (a small part and when the reaction started all the solution) 2-bromobenzyl bromide (2.988 g; 11.7 mmol) dissolved in Et<sub>2</sub>O (12 mL). The mixture was refluxed for 1h 15 min. Under nitrogen, the Grignard reagent was transferred with a canula to a solution of cinnamyl bromide (2.400 g; 11.8 mmol) in THF (12 mL). After refluxing 2 h 45 min, the reaction mixture was hydrolyzed (HCl 10%), and extracted with Et<sub>2</sub>O. The combined extracts were washed with water, dried (MgSO<sub>4</sub>) and concentrated. The crude residue was purified by flash column chromatography (hexane) to provide (*E*)-1-bromo-2-(4-phenylbut-3-en-1-yl) benzene. The (*E*)-1-bromo-2-(4-phenylbut-3-en-1-yl) benzene (1.1 mmol) is then dissolved in anhydrous tetrahydrofuran (1.5 mL) and the reaction mixture is placed in a low-temperature stirring reactor and cooled to -78 °C. Then, *n*-butyllithium (2.2 mmol, 1.55 M in hexane) was slowly added to the reaction mixture, and after stirring for 30 minutes, (*R*)-*tert*-butylsulfothiobutyl (1 mmol) dissolved in 1 mL anhydrous tetrahydrofuran was slowly added to the reaction mixture. Continue stirring at -78 °C for 1h. After the reaction, the temperature was slowly raised to 0 °C, the saturated ammonium chloride solution was added, the aqueous phase was extracted by ethyl acetate, the saturated sodium chloride aqueous solution was washed, the organic phase was separated, the anhydrous sodium sulfate was dried, the concentration was reduced pressure, and the crude product was

purified by silica gel column chromatography (pure petroleum ether) to obtain compounds **L4** (84.2 mg, 27 %).

**(S)-1-(tert-Butylsulfinyl)-2-(4-phenylbut-3-en-1-yl) benzene (L4):** Chromatography (PE/EA = 20/1). Color-free wax; 30% yield (18.7 mg); *ee*: 96%.  $[\alpha]_D^{20} = +118.2$  (c 1.0, CHCl<sub>3</sub>). **HPLC**: [Daicel CHIRALPAK AD-H (0.46 cm × 25 cm); *n*-hexane/2-propanol = 90/10; flow rate = 1.0 mL/min; detection wavelength = 254 nm; *t<sub>R</sub>* = 8.64 (minor), 10.98 (major) min]. **<sup>1</sup>H NMR** (400 MHz, CDCl<sub>3</sub>) δ 7.89 – 7.82 (m, 1H), 7.43 – 7.39 (m, 2H), 7.39 – 7.35 (m, 2H), 7.35 – 7.31 (m, 3H), 7.28 – 7.19 (m, 1H), 6.42 (d, *J* = 15.6 Hz, 1H), 6.26 – 6.19 (m, 1H), 3.15 – 3.08 (m, 1H), 2.76 – 2.69 (m, 1H), 2.66 – 2.59 (m, 1H), 2.57 – 2.47 (m, 1H), 1.24 (s, 9H). **<sup>13</sup>C NMR** (150 MHz, CDCl<sub>3</sub>) δ 141.2, 138.5, 137.3, 131.1, 131.0, 129.1, 128.9, 128.5, 127.1, 126.6, 126.5, 126.0, 57.5, 34.4, 32.4, 23.0. **IR** (KBr):  $\nu_{\max}$  (cm<sup>-1</sup>) = 3428, 3131, 3010, 2911, 1633, 1612, 1422, 1268, 1249, 758, 746. **HRMS** (ESI<sup>+</sup>) calcd for C<sub>20</sub>H<sub>25</sub>OS [M+H]<sup>+</sup>: 313.1621, Found: 313.1617.

#### 5) Procedure for the synthesis of chiral ligands **L5**

**L5** was prepared from the procedure for preparing **L3** without reduction step.

**(1E, 2E)-N-(2-((R)-tert-butylsulfinyl) phenyl)-3-phenylprop-2-en-1-imine (L5)**

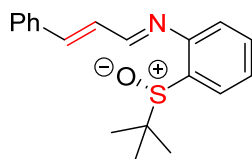

**L5**

Yellow solid; 87% yield (54.1 mg); **HPLC** *ee*: 99% [Daicel CHIRALCEL OD-H (0.46 cm × 25 cm); *n*-hexane/2-propanol = 90/10; flow rate = 1.0 mL/min; detection wavelength = 214 nm; *t<sub>R</sub>* = 15.58 (minor), 22.29 (major) min].  $[\alpha]_D^{20} = -31.1$  (c 1.0, CHCl<sub>3</sub>). **<sup>1</sup>H NMR** (400 MHz, CDCl<sub>3</sub>) δ 8.25 (d, *J* = 8.0 Hz, 1H), 7.94 (dd, *J* = 7.8, 1.6 Hz, 1H), 7.61 – 7.56 (m, 2H), 7.50 (td, *J* = 7.6, 1.6 Hz, 1H), 7.45 – 7.38 (m, 4H), 7.23 – 7.14 (m, 2H), 7.06 (dd, *J* = 7.8, 1.2 Hz, 1H), 1.20 (s, 9H). **<sup>13</sup>C NMR** (151 MHz, CDCl<sub>3</sub>) δ 162.6, 150.3, 145.4, 135.3, 135.2, 131.8, 130.0, 128.9, 128.1, 127.7, 127.0, 126.2, 117.4, 58.3, 23.4. **IR** (KBr):  $\nu_{\max}$  (cm<sup>-1</sup>) = 3543, 3111, 3012, 2912, 1643, 1611, 1421, 1235, 1224, 752, 741. **HRMS** (ESI<sup>+</sup>) calcd for C<sub>19</sub>H<sub>21</sub>NNaOS [M+Na]<sup>+</sup>: 334.1236, Found: 334.1238.

#### 6) Procedure for the synthesis of chiral ligands **L6**

**L6** was prepared from the procedure for preparing **L1** without reduction step.

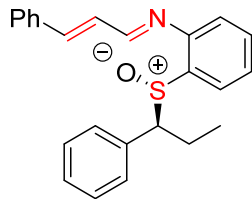

**L6**

**(2E)-3-Phenyl-N-(2-((R)-((R)-1-phenylpropyl) sulfinyl) phenyl) prop-2-en-1-imine (L6):** Yellow wax; 47% yield (35.1 mg);  $[\alpha]_D^{20} = +0.19$  (c 1.0, CHCl<sub>3</sub>). **<sup>1</sup>H NMR** (600 MHz,

CDCl<sub>3</sub>)  $\delta$  8.32 (d,  $J$  = 8.9 Hz, 1H), 7.63 – 7.57 (m, 2H), 7.43 (t,  $J$  = 7.2 Hz, 2H), 7.40 (d,  $J$  = 7.0 Hz, 1H), 7.30 (td,  $J$  = 7.5, 1.7 Hz, 1H), 7.28 – 7.23 (m, 1H), 7.13 (dd,  $J$  = 15.6, 8.4 Hz, 2H), 7.07 (t,  $J$  = 7.4 Hz, 2H), 7.04 – 6.96 (m, 3H), 6.80 (d,  $J$  = 7.2 Hz, 2H), 4.06 (t,  $J$  = 7.8 Hz, 1H), 2.46 (dt,  $J$  = 14.4, 7.3 Hz, 1H), 2.24 – 2.13 (m, 1H), 1.15 (t,  $J$  = 7.4 Hz, 3H). <sup>13</sup>C NMR (150 MHz, CDCl<sub>3</sub>)  $\delta$  161.8, 147.2, 145.6, 136.7, 135.2, 133.4, 130.9, 130.1, 129.0, 128.9, 128.1, 127.7, 127.5, 127.3, 126.3, 125.6, 116.2, 67.5, 23.3, 12.3. IR (KBr):  $\nu_{\text{max}}$  (cm<sup>-1</sup>) = 747, 757, 1226, 1233, 1471 1615, 1698, 2915, 3113, 3233, 3578. HRMS (ESI<sup>+</sup>) calcd for C<sub>24</sub>H<sub>23</sub>NNaOS [M+Na]<sup>+</sup>: 396.1393, Found: 396.1384.

### 3. General procedures for the synthesis of N-nosylimine **2**<sup>[4]</sup>

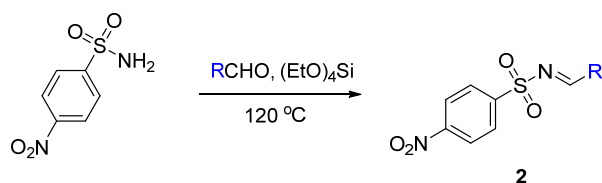

Amixture of 4-nitrobenzenesulfonamide (5 mmol), aldehyde (5.5 mmol) and tetraethyl orthosilicate (5.5 mmol) was heated in flask equipped with Dean-Star at 120 °C for 12h. After cooling at room temperature, the product was crystallized in EtOAc/heptane mixture. The crystals were collected by filtration, washed with pentane and dried under vacuum.

### 4. General procedure for the synthesis of **3**

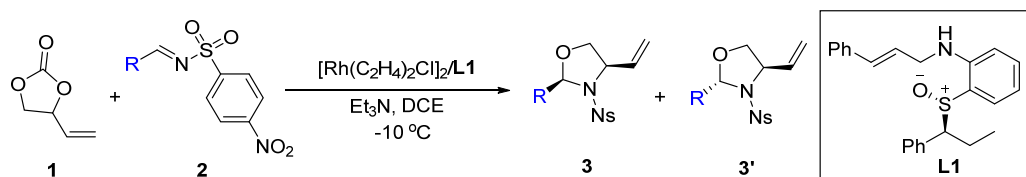

In a screw-cap Schlenk tube filled with argon, [Rh(C<sub>2</sub>H<sub>4</sub>)<sub>2</sub>Cl]<sub>2</sub> (0.004 mmol, 2 mol%), Sulfoxide ligand **L1** (0.008 mmol, 4 mol%), N-nosylimine **2** (0.20 mmol) were added. After that, 4-Vinyl-1,3-dioxolan-2-one **1** (0.40 mmol) and 1,2-Dichloroethane (DCE) (2.0 mL) were added. Finally, add Triethylamine (0.3 mmol). After 24 h stirring at -10 °C, the reaction mixture was filtered over silica (CH<sub>2</sub>Cl<sub>2</sub>) and concentrated under reduced pressure to afford the crude product. The crude residue was purified by flash column chromatography (petroleum ether/ethyl acetate) to give the desired products **3**.

(2*R*,4*R*)-2-(3-chlorophenyl)-3-((4-nitrophenyl)sulfonyl)-4-vinyloxazolidine (**3g**)

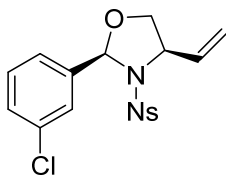

White solid; **m.p.**: 149 - 150 °C; 34% yield (26.7 mg); **HPLC ee**: 81% [Daicel CHIRALPAK AD-H (0.46 cm × 25cm); *n*-hexane/2-propanol = 90/10; flow rate = 1.0 mL/min; detection wavelength = 214 nm; *t<sub>R</sub>* = 20.36 (major), 23.67 (minor) min]. **[α]<sup>20<sub>D</sub></sup>** = + 29.1 (c 1.0, CHCl<sub>3</sub>). **<sup>1</sup>H NMR** (400 MHz, CDCl<sub>3</sub>) δ 8.31 (d, *J* = 8.8 Hz, 2H), 7.87 (d, *J* = 8.9 Hz, 2H), 7.42 – 7.36 (m, 2H), 7.35 – 7.29 (m, 2H), 6.18 (s, 1H), 5.77 – 5.68 (m, 1H), 5.34 (d, *J* = 17.0 Hz, 1H), 5.26 (d, *J* = 10.1 Hz, 1H), 4.45 (q, *J* = 7.1 Hz, 1H), 4.08 (dd, *J* = 9.1, 7.1 Hz, 1H), 3.78 (dd, *J* = 9.1, 5.4 Hz, 1H). **<sup>13</sup>C NMR** (101 MHz, CDCl<sub>3</sub>) δ 150.4, 144.3, 139.0, 135.1, 134.7, 130.0, 129.6, 129.0, 127.5, 125.7, 124.3, 119.6, 91.6, 71.2, 62.0. **IR** (CH<sub>2</sub>Cl<sub>2</sub>): *ν*<sub>max</sub> (cm<sup>-1</sup>) = 3104, 3061, 2960, 2922, 2871, 2299, 1759, 1600, 1532, 1351, 1266, 1174, 1120, 850, 755, 692, 631, 574. **HRMS** (ESI<sup>+</sup>) calcd for C<sub>17</sub>H<sub>15</sub>ClN<sub>2</sub>NaO<sub>5</sub>S [M+Na]<sup>+</sup>: 417.0282, Found: 417.0294.

**(2S,4R)-2-(3-chlorophenyl)-3-((4-nitrophenyl)sulfonyl)-4-vinyloxazolidine (3g')**

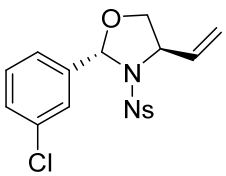

White solid; **m.p.**: 149 - 150 °C; 25% yield (19.7 mg); **HPLC ee**: 70% [Daicel CHIRALPAK AD-H (0.46 cm × 25cm); *n*-hexane/2-propanol = 90/10; flow rate = 1.0 mL/min; detection wavelength = 214 nm; *t<sub>R</sub>* = 17.26 (major), 25.36 (minor) min]. **[α]<sup>20<sub>D</sub></sup>** = - 10.9 (c 1.0, CHCl<sub>3</sub>). **<sup>1</sup>H NMR** (400 MHz, CDCl<sub>3</sub>) δ 8.19 (d, *J* = 8.9 Hz, 2H), 7.58 (d, *J* = 8.9 Hz, 2H), 7.37 – 7.31 (m, 1H), 7.14 – 7.10 (m, 1H), 6.14 (s, 1H), 5.92 (ddd, *J* = 17.0, 10.1, 8.6 Hz, 1H), 5.46 (d, *J* = 17.0 Hz, 1H), 5.35 (d, *J* = 10.1 Hz, 1H), 4.48 (dt, *J* = 8.6, 5.6 Hz, 1H), 4.30 (dd, *J* = 8.8, 6.0 Hz, 1H), 3.88 (dd, *J* = 8.8, 5.3 Hz, 1H). **<sup>13</sup>C NMR** (101 MHz, CDCl<sub>3</sub>) δ 149.9, 146.0, 138.7, 134.5, 134.1, 129.8, 129.7, 128.4, 128.0, 126.7, 123.9, 119.6, 91.5, 71.8, 62.7. **IR** (CH<sub>2</sub>Cl<sub>2</sub>): *ν*<sub>max</sub> (cm<sup>-1</sup>) = 3113, 3067, 2961, 2928, 2873, 2300, 1763, 1607, 1531, 1355, 1268, 1177, 1121, 858, 759, 691, 638, 579. **HRMS** (ESI<sup>+</sup>) calcd for C<sub>17</sub>H<sub>15</sub>ClN<sub>2</sub>NaO<sub>5</sub>S [M+Na]<sup>+</sup>: 417.0282, Found: 417.0294.

**(2R,4R)-2-(3-methoxyphenyl)-3-((4-nitrophenyl)sulfonyl)-4-vinyloxazolidine (3h)**

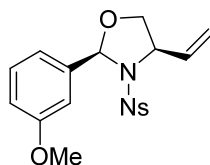

Pale yellow solid; **m.p.**: 108 - 110 °C; 40% yield (31.2 mg); **HPLC ee**: 85% [Daicel CHIRALPAK IA-H (0.46 cm × 25cm); *n*-hexane/2-propanol = 90/10; flow rate = 1.0 mL/min; detection wavelength = 254 nm; *t<sub>R</sub>* = 23.56 (major), 29.08 (minor) min]. **[α]<sup>20<sub>D</sub></sup>** = + 77.2 (c 1.0, CHCl<sub>3</sub>). **<sup>1</sup>H NMR** (600 MHz, CDCl<sub>3</sub>) δ 8.12 (d, *J* = 8.8 Hz, 2H), 7.53 (d, *J* = 8.8 Hz, 2H), 7.19 (t, *J* = 7.9 Hz, 1H), 6.90 (d, *J* = 7.6 Hz, 1H), 6.86 (dd, *J* = 8.2, 1.7 Hz, 1H), 6.68 (t, *J* = 2.1 Hz, 1H), 6.12 (s, 1H), 5.92 (ddd, *J* = 17.0, 10.1, 8.6 Hz, 1H), 5.43 (d, *J* = 17.0 Hz, 1H), 5.31 (d, *J* = 10.1 Hz, 1H), 4.45 (dt, *J* = 8.6, 5.7 Hz, 1H), 4.30 (dd, *J* = 8.8, 6.1 Hz, 1H), 3.86 (dd, *J* = 8.8, 5.4 Hz, 1H), 3.70 (s, 3H). **<sup>13</sup>C NMR** (101 MHz, CDCl<sub>3</sub>) δ 159.6, 149.7, 146.1, 138.1, 134.5, 129.4, 128.4, 123.7, 120.7, 119.3, 114.8, 113.9, 92.2, 71.8, 62.6, 55.3. **IR** (CH<sub>2</sub>Cl<sub>2</sub>): *ν*<sub>max</sub> (cm<sup>-1</sup>) = 3109, 3066, 2972, 2916, 2855, 2271, 1739, 1626, 1531, 1327, 1244, 1176, 871, 786, 698, 643. **HRMS** (ESI<sup>+</sup>) calcd for C<sub>18</sub>H<sub>18</sub>N<sub>2</sub>NaO<sub>6</sub>S [M+Na]<sup>+</sup>: 413.0778, Found: 413.0782.

**(2S,4R)-2-(3-methoxyphenyl)-3-((4-nitrophenyl)sulfonyl)-4-vinyloxazolidine (3h')**

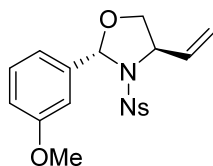

Pale yellow solid; **m.p.**: 108 - 110 °C; 21% yield (16.3 mg); **HPLC ee**: 57% [Daicel CHIRALPAK IA-H (0.46 cm × 25cm); *n*-hexane/2-propanol = 90/10; flow rate = 1.0 mL/min; detection wavelength = 254 nm; *t<sub>R</sub>* = 23.43 (major), 26.60 (minor) min]. **[α]<sup>20</sup><sub>D</sub>** = -26.5 (c 1.0, CHCl<sub>3</sub>). **<sup>1</sup>H NMR** (600 MHz, CDCl<sub>3</sub>) δ 8.12 (d, *J* = 8.4 Hz, 2H), 7.53 (d, *J* = 8.7 Hz, 2H), 7.19 (t, *J* = 7.9 Hz, 1H), 6.90 (d, *J* = 7.6 Hz, 1H), 6.88 – 6.83 (m, 1H), 6.68 (t, *J* = 2.0 Hz, 1H), 6.12 (s, 1H), 5.92 (dt, *J* = 17.4, 9.3 Hz, 1H), 5.43 (d, *J* = 17.0 Hz, 1H), 5.32 (d, *J* = 10.1 Hz, 1H), 4.45 (dt, *J* = 8.6, 5.8 Hz, 1H), 4.30 (dd, *J* = 8.8, 6.0 Hz, 1H), 3.86 (dd, *J* = 8.6, 5.2 Hz, 1H), 3.71 (s, 3H). **<sup>13</sup>C NMR** (151 MHz, CDCl<sub>3</sub>) δ 159.5, 149.7, 146.0, 138.0, 134.4, 129.4, 128.4, 123.7, 120.7, 119.3, 114.8, 113.8, 92.2, 71.8, 62.6, 55.3. **IR** (CH<sub>2</sub>Cl<sub>2</sub>): *v*<sub>max</sub> (cm<sup>-1</sup>) = 3103, 3059, 2962, 2909, 2851, 2274, 1733, 1624, 1537, 1322, 1241, 1175, 866, 781, 671, 649. **HRMS** (ESI<sup>+</sup>) calcd for C<sub>18</sub>H<sub>18</sub>N<sub>2</sub>NaO<sub>6</sub>S [M+Na]<sup>+</sup>: 413.0778, Found: 413.0782.

**(2*R*,4*R*)-2-(3-ethoxyphenyl)-3-((4-nitrophenyl)sulfonyl)-4-vinyloxazolidine (3i)**

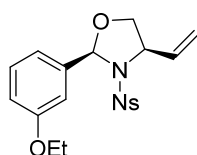

Yellow solid; **m.p.**: 100 - 102 °C; 32% yield (25.8 mg); **HPLC ee**: 73% [Daicel CHIRALPAK IC-H (0.46 cm × 25cm); *n*-hexane/2-propanol = 95/5; flow rate = 1.0 mL/min; detection wavelength = 254 nm; *t<sub>R</sub>* = 48.18 (major), 51.53 (minor) min]. **[α]<sup>20</sup><sub>D</sub>** = +15.9 (c 1.0, CHCl<sub>3</sub>). **<sup>1</sup>H NMR** (600 MHz, CDCl<sub>3</sub>) δ 8.26 (d, *J* = 8.8 Hz, 2H), 7.82 (d, *J* = 8.8 Hz, 2H), 7.24 (t, *J* = 7.9 Hz, 1H), 7.01 (d, *J* = 7.6 Hz, 1H), 6.91 (t, *J* = 2.1 Hz, 1H), 6.86 (dd, *J* = 8.1, 2.4 Hz, 1H), 6.17 (s, 1H), 5.80 – 5.73 (m, 1H), 5.34 (d, *J* = 17.0 Hz, 1H), 5.24 (d, *J* = 10.2 Hz, 1H), 4.51 – 4.46 (m, 1H), 4.09 (dd, *J* = 9.1, 7.0 Hz, 1H), 4.01 – 3.94 (m, 2H), 3.81 (dd, *J* = 9.1, 5.2 Hz, 1H), 1.39 (t, *J* = 7.0 Hz, 3H). **<sup>13</sup>C NMR** (151 MHz, CDCl<sub>3</sub>) δ 159.1, 150.1, 144.6, 138.1, 135.4, 129.7, 128.9, 124.1, 119.6, 119.3, 115.4, 113.5, 92.3, 71.1, 63.6, 62.0, 14.8. **IR** (CH<sub>2</sub>Cl<sub>2</sub>): *v*<sub>max</sub> (cm<sup>-1</sup>) = 3058, 2960, 2928, 2869, 2307, 1771, 1603, 1539, 1353, 1268, 1174, 857, 756, 703, 620. **HRMS** (ESI<sup>+</sup>) calcd for C<sub>19</sub>H<sub>20</sub>N<sub>2</sub>NaO<sub>6</sub>S [M+Na]<sup>+</sup>: 427.0934, Found: 427.0928.

**(2*S*,4*R*)-2-(3-ethoxyphenyl)-3-((4-nitrophenyl)sulfonyl)-4-vinyloxazolidine (3i')**

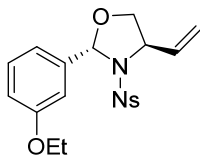

Yellow solid; **m.p.**: 100 - 102 °C; 26% yield (21.0 mg); **HPLC ee**: 81% [Daicel CHIRALPAK IC-H (0.46 cm × 25cm); *n*-hexane/2-propanol = 95/5; flow rate = 1.0 mL/min; detection wavelength = 254 nm; *t<sub>R</sub>* = 63.56 (minor), 70.99 (major) min]. **[α]<sup>20</sup><sub>D</sub>** = -9.2 (c 1.0, CHCl<sub>3</sub>). **<sup>1</sup>H NMR** (400 MHz, CDCl<sub>3</sub>) δ 8.13 (d, *J* = 8.9 Hz, 2H), 7.53 (d, *J* = 8.8 Hz, 2H), 7.19 (t, *J* = 7.9 Hz, 1H), 6.93 – 6.83 (m, 2H), 6.66 (t, *J* = 2.1 Hz, 1H), 6.12 (s, 1H), 5.96 (ddd, *J* = 17.1, 10.1, 8.5 Hz, 1H), 5.45 (d, *J* = 17.0 Hz, 1H), 5.34 (d, *J* = 10.1 Hz, 1H), 4.47 (dt, *J* = 8.5, 5.7 Hz, 1H), 4.32 (dd, *J* = 8.7, 6.0 Hz, 1H), 3.97 – 3.91 (m, 1H), 3.91 – 3.83 (m, 2H), 1.38 (t, *J* = 7.0 Hz, 3H). **<sup>13</sup>C NMR** (101 MHz, CDCl<sub>3</sub>) δ 158.9, 149.7, 146.1, 137.9, 134.5, 129.4, 128.4, 123.7, 120.6, 119.2, 115.3, 114.4, 92.2, 71.8, 63.6, 62.7, 14.8. **IR** (CH<sub>2</sub>Cl<sub>2</sub>): *v*<sub>max</sub> (cm<sup>-1</sup>) = 3055, 2962, 2930, 2869, 2307, 1773, 1601, 1537, 1352, 1269, 1177, 860, 755, 701, 621. **HRMS** (ESI<sup>+</sup>) calcd for C<sub>19</sub>H<sub>20</sub>N<sub>2</sub>NaO<sub>6</sub>S [M+Na]<sup>+</sup>: 427.0934, Found: 427.0928.

**(2,4*R*)-3-((4-nitrophenyl)sulfonyl)-2-(3-phenoxyphenyl)-4-vinyloxazolidine (3j/3j')**

(\*: representative signals for the minor diastereoisomer)



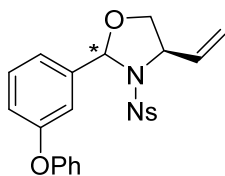

White solid; **m.p.**: 118 - 120 °C; 54% yield (48.7 mg); **HPLC ee**: 70% /77% [Daicel CHIRALCEL OD-H (0.46 cm × 25cm); *n*-hexane/2-propanol = 95/5; flow rate = 1.0 mL/min; detection wavelength = 254 nm; *t<sub>R</sub>* = 42.89 (major), 56.432 (minor) min, *t<sub>R</sub>* = 48.41 (major), 67.63 (minor) min.]. **[α]<sup>20<sub>D</sub></sup>** = + 75.8 (c 1.0, CHCl<sub>3</sub>). **<sup>1</sup>H NMR** (400 MHz, CDCl<sub>3</sub>) δ 8.27 (d, *J* = 8.9 Hz, 2H), 8.17\* (d, *J* = 8.9 Hz, 1H), 7.84 (d, *J* = 8.8 Hz, 2H), 7.59\* (d, *J* = 8.8 Hz, 1H), 7.37 – 7.31 (m, 3H), 7.30 (d, *J* = 7.9 Hz, 1H), 7.25 – 7.19 (m, 2H), 7.15 – 7.10 (m, 2H), 7.08 (dt, *J* = 7.7, 1.3 Hz, 1H), 7.03 (t, *J* = 2.1 Hz, 1H), 6.98 (dd, *J* = 2.5, 1.1 Hz, 1H), 6.97 – 6.92 (m, 4H), 6.86 (t, *J* = 2.0 Hz, 1H), 6.20 (s, 1H), 6.13\* (s, 1H), 5.88\* (ddd, *J* = 17.1, 10.1, 8.6 Hz, 1H), 5.68 (ddd, *J* = 17.1, 10.2, 7.8 Hz, 1H), 5.45 – 5.35\* (m, 1H), 5.31 (s, 1H), 5.28\* (d, *J* = 6.5 Hz, 1H), 5.19 (dt, *J* = 10.1, 1.0 Hz, 1H), 4.51 – 4.44 (m, 1H), 4.44 – 4.39\* (m, 1H), 4.27\* (dd, *J* = 8.8, 6.0 Hz, 1H), 4.07 (dd, *J* = 9.1, 7.0 Hz, 1H), 3.84\* (dd, *J* = 8.8, 5.1 Hz, 1H), 3.78 (dd, *J* = 9.1, 5.2 Hz, 1H). **<sup>13</sup>C NMR** (101 MHz, CDCl<sub>3</sub>) δ 157.7, 157.4\*, 156.7, 156.57\*, 150.3, 149.8\*, 146.1\*, 144.6, 138.9, 138.8\*, 135.1, 134.3\*, 130.0, 129.9, 129.7, 128.9, 128.5\*, 124.2, 123.8, 123.8, 122.9\*, 122.3, 119.6\*, 119.5, 119.3, 119.2, 119.1\*, 118.1\*, 117.4, 92.0, 91.9\*, 71.7\*, 71.1, 62.6\*, 61.9. **IR** (CH<sub>2</sub>Cl<sub>2</sub>): *v*<sub>max</sub> (cm<sup>-1</sup>) = 3107, 3055, 2985, 2927, 2830, 2281, 1726, 1616, 1522, 1344, 1267, 1182, 878, 789, 690, 621. **HRMS** (ESI<sup>+</sup>) calcd for C<sub>23</sub>H<sub>20</sub>N<sub>2</sub>NaO<sub>6</sub>S [M+Na]<sup>+</sup>: 475.0934, Found: 475.0927.

**(2R,4R)-3-((4-nitrophenyl)sulfonyl)-2-(m-tolyl)-4-vinyloxazolidine (3k)**

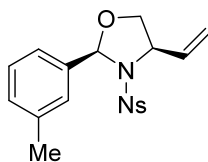

Pale yellow solid; **m.p.**: 105 - 107 °C; 44% yield (32.8 mg); **HPLC ee**: 73% [Daicel CHIRALPAK AD-H (0.46 cm × 25cm); *n*-hexane/2-propanol = 90/10; flow rate = 1.0 mL/min; detection wavelength = 254 nm; *t<sub>R</sub>* = 15.36 (major), 18.38 (minor) min.]. **[α]<sup>20<sub>D</sub></sup>** = +31.2 (c 1.0, CHCl<sub>3</sub>). **<sup>1</sup>H NMR** (600 MHz, CDCl<sub>3</sub>) δ 8.24 (d, *J* = 8.4 Hz, 2H), 7.79 (d, *J* = 8.5 Hz, 2H), 7.25 – 7.17 (m, 3H), 7.16 (d, *J* = 6.6 Hz, 1H), 6.16 (s, 1H), 5.82 – 5.74 (m, 1H), 5.35 (d, *J* = 17.1 Hz, 1H), 5.25 (d, *J* = 10.1 Hz, 1H), 4.54 – 4.46 (m, 1H), 4.09 (dd, *J* = 9.1, 7.0 Hz, 1H), 3.82 (dd, *J* = 9.2, 4.9 Hz, 1H), 2.30 (s, 3H). **<sup>13</sup>C NMR** (101 MHz, CDCl<sub>3</sub>) δ 150.2, 144.8, 138.3, 136.5, 135.5, 130.2, 128.9, 128.5, 128.1, 124.7, 124.1, 119.2, 92.6, 71.2, 62.0, 21.4. **IR** (CH<sub>2</sub>Cl<sub>2</sub>): *v*<sub>max</sub> (cm<sup>-1</sup>) = 3109, 3058, 2981, 2923, 2830, 2289, 1724, 1613, 1516, 1342, 1261, 1177, 880, 781, 686, 621. **HRMS** (ESI<sup>+</sup>) calcd for C<sub>18</sub>H<sub>18</sub>N<sub>2</sub>NaO<sub>5</sub>S [M+Na]<sup>+</sup>: 397.0829, Found: 397.0842.

**(2S,4R)-3-((4-nitrophenyl)sulfonyl)-2-(m-tolyl)-4-vinyloxazolidine (3k')**

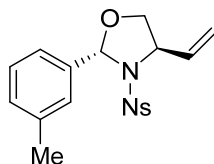

Pale yellow solid; **m.p.**: 105 - 107 °C; 23% yield (17.2 mg); **HPLC ee**: 65% [Daicel CHIRALPAK AD-H (0.46 cm × 25cm); *n*-hexane/2-propanol = 90/10; flow rate = 1.0 mL/min; detection wavelength = 214 nm; *t<sub>R</sub>* = 14.15 (major), 19.33 (minor) min.]. **[α]<sup>20<sub>D</sub></sup>** = - 16.1 (c 1.0, CHCl<sub>3</sub>). **<sup>1</sup>H NMR** (600 MHz, CDCl<sub>3</sub>) δ 8.10 (d, *J* = 8.9 Hz, 2H), 7.48 (d, *J* = 8.8 Hz, 2H), 7.15 (d, *J* = 6.8 Hz, 2H), 7.12 – 7.07 (m, 1H), 6.96 (s, 1H), 6.11 (s, 1H), 5.97 – 5.90 (m, 1H), 5.43 (d, *J* = 17.0 Hz, 1H), 5.32 (d, *J* = 10.1 Hz, 1H), 4.45 (dt, *J* = 8.7, 5.8 Hz, 1H), 4.30 (dd, *J* = 8.8, 6.1 Hz, 1H), 3.86 (dd, *J* = 8.8, 5.5 Hz, 1H), 2.21 (s, 3H). **<sup>13</sup>C NMR** (101 MHz, CDCl<sub>3</sub>) δ 149.7, 146.1, 138.1, 136.5, 134.5, 130.5, 128.6, 128.5, 128.3, 125.6, 123.6, 119.2, 92.5, 71.8, 62.7, 21.3. **IR** (CH<sub>2</sub>Cl<sub>2</sub>): *v*<sub>max</sub> (cm<sup>-1</sup>) = 3109, 3058, 2981, 2923, 2830, 2289, 1724, 1613, 1516,

1342, 1261, 1177, 880, 781, 686, 621. **HRMS** (ESI<sup>+</sup>) calcd for C<sub>18</sub>H<sub>18</sub>N<sub>2</sub>NaO<sub>5</sub>S [M+Na]<sup>+</sup>: 397.0829, Found: 397.0842.

**(2*R*,4*R*)-2-(3,4-dimethylphenyl)-3-((4-nitrophenyl)sulfonyl)-4-vinyloxazolidine (3l)**

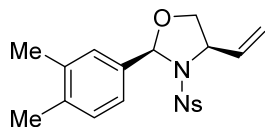

White solid; **m.p.**: 110 - 113 °C; 34% yield (26.3 mg); **HPLC** *ee*: 87% [Daicel CHIRALPAK AD-H (0.46 cm × 25cm); *n*-hexane/2-propanol = 98/2; flow rate = 1.0 mL/min; detection wavelength = 214 nm; *t<sub>R</sub>* = 39.19 (major), 54.61 (minor) min]. [ $\alpha$ ]<sub>D</sub><sup>20</sup> = +32.9 (c 1.0, CHCl<sub>3</sub>). **<sup>1</sup>H NMR** (600 MHz, CDCl<sub>3</sub>)  $\delta$  8.22 (d, *J* = 8.6 Hz, 2H), 7.78 (d, *J* = 8.7 Hz, 2H), 7.14 (d, *J* = 7.7 Hz, 1H), 7.11 (s, 1H), 7.07 (d, *J* = 7.7 Hz, 1H), 6.12 (s, 1H), 5.79 (ddd, *J* = 17.7, 10.1, 8.1 Hz, 1H), 5.35 (d, *J* = 17.1 Hz, 1H), 5.25 (d, *J* = 10.1 Hz, 1H), 4.49 (q, *J* = 7.3 Hz, 1H), 4.08 (dd, *J* = 8.9, 7.1 Hz, 1H), 3.82 (dd, *J* = 9.1, 4.8 Hz, 1H), 2.25 (s, 3H), 2.19 (s, 3H). **<sup>13</sup>C NMR** (151 MHz, CDCl<sub>3</sub>)  $\delta$  150.0, 144.8, 138.2, 136.9, 135.5, 133.8, 129.7, 128.9, 128.6, 125.1, 124.0, 119.3, 92.5, 71.1, 61.9, 19.9, 19.7. **IR** (CH<sub>2</sub>Cl<sub>2</sub>):  $\nu_{\text{max}}$  (cm<sup>-1</sup>) = 3110, 3059, 2979, 2928, 2830, 2280, 1725, 1613, 1517, 1341, 1269, 1181, 873, 788, 682, 675, 620. **HRMS** (ESI<sup>+</sup>) calcd for C<sub>19</sub>H<sub>20</sub>N<sub>2</sub>NaO<sub>5</sub>S [M+Na]<sup>+</sup>: 411.0985, Found: 411.09931.

**(2*S*,4*R*)-2-(3,4-dimethylphenyl)-3-((4-nitrophenyl)sulfonyl)-4-vinyloxazolidine (3l')**

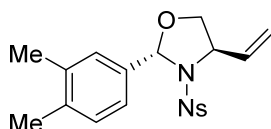

White solid; **m.p.**: 110 - 113 °C; 21% yield (16.2 mg); **HPLC** *ee*: 81% [Daicel CHIRALPAK AD-H (0.46 cm × 25cm); *n*-hexane/2-propanol = 98/2; flow rate = 1.0 mL/min; detection wavelength = 214 nm; *t<sub>R</sub>* = 44.27 (minor), 45.44 (major) min]. [ $\alpha$ ]<sub>D</sub><sup>20</sup> = - 88.6 (c 1.0, CHCl<sub>3</sub>). **<sup>1</sup>H NMR** (600 MHz, CDCl<sub>3</sub>)  $\delta$  8.07 (d, *J* = 8.7 Hz, 2H), 7.49 (d, *J* = 8.8 Hz, 2H), 7.02 (s, 2H), 6.87 (s, 1H), 6.07 (s, 1H), 5.94 (dt, *J* = 17.5, 9.4 Hz, 1H), 5.43 (d, *J* = 17.0 Hz, 1H), 5.31 (d, *J* = 10.1 Hz, 1H), 4.49 – 4.45 (m, 1H), 4.33 – 4.28 (m, 1H), 3.85 (dd, *J* = 8.6, 5.6 Hz, 1H), 2.24 (s, 3H), 2.08 (s, 3H). **<sup>13</sup>C NMR** (151 MHz, CDCl<sub>3</sub>)  $\delta$  149.5, 146.1, 138.5, 136.6, 134.6, 133.9, 129.4, 129.0, 128.5, 126.0, 123.5, 119.1, 92.3, 71.7, 62.7, 19.7, 19.7. **IR** (CH<sub>2</sub>Cl<sub>2</sub>):  $\nu_{\text{max}}$  (cm<sup>-1</sup>) = 3112, 3058, 2980, 2928, 2831, 2284, 1722, 1617, 1520, 1340, 1266, 1180, 872, 789, 684, 677, 622. **HRMS** (ESI<sup>+</sup>) calcd for C<sub>19</sub>H<sub>20</sub>N<sub>2</sub>NaO<sub>5</sub>S [M+Na]<sup>+</sup>: 411.0985, Found: 411.09931.

**(2,4*R*)-2-(3,4-dichlorophenyl)-3-((4-nitrophenyl)sulfonyl)-4-vinyloxazolidine (3m/3m')**

(\*: representative signals for the minor diastereoisomer)

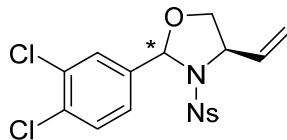

White solid; **m.p.**: 150 - 153 °C; 53% yield (45.3 mg); **HPLC** *ee*: 86%/70% [Daicel CHIRALPAK AD-H (0.46 cm × 25cm); *n*-hexane/2-propanol = 80/20; flow rate = 0.3 mL/min; detection wavelength = 214 nm; *t<sub>R</sub>* = 38.50 (major), 48.60 (minor) min, *t<sub>R</sub>* = 41.85 (major), 50.46 (minor) min]. [ $\alpha$ ]<sub>D</sub><sup>20</sup> = + 4.8 (c 1.0, CHCl<sub>3</sub>); **<sup>1</sup>H NMR** (600 MHz, CDCl<sub>3</sub>)  $\delta$  8.36 (d, *J* = 8.7 Hz, 2H), 8.22\* (d, *J* = 8.7 Hz, 1H), 7.94 (d, *J* = 8.7 Hz, 2H), 7.64\* (d, *J* = 8.7 Hz, 1H), 7.53 (d, *J* = 2.1 Hz, 1H), 7.45 (d, *J* = 8.3 Hz, 1H), 7.41\* (d, *J* = 8.2 Hz, 1H), 7.36 (dd, *J* = 8.4, 2.1 Hz, 1H), 7.29 – 7.24 (m, 2H), 6.17 (s, 1H), 6.10\* (s, 1H), 5.85 – 5.78\* (m, 1H), 5.70 (ddd, *J* = 17.4, 10.2, 7.6 Hz, 1H), 5.44\* (d, *J* = 17.0 Hz, 1H), 5.36 – 5.30 (m, 2H), 5.26 (d, *J* = 10.2 Hz, 1H), 4.50 – 4.44\* (m, 1H), 4.38 (q, *J* = 6.9 Hz, 1H), 4.25\* (dd, *J* = 8.9, 6.1 Hz, 1H), 4.05 (dd, *J* = 9.2, 7.1 Hz, 1H), 3.84\* (dd, *J* = 9.0, 5.1 Hz, 1H), 3.73 (dd, *J* = 9.2, 5.8 Hz, 1H). **<sup>13</sup>C NMR** (151 MHz, CDCl<sub>3</sub>)  $\delta$  150.5, 150.0\*, 145.9, 143.7\*, 137.4, 137.0\*, 134.7, 134.08\*, 133.80, 133.73\*,

133.01, 132.80\*, 130.74, 130.40\*, 129.75\*, 129.25, 129.10\*, 128.5, 127.6, 126.7\*, 124.5, 124.0\*, 120.0, 119.7\*, 91.0, 90.8\*, 71.6, 71.0\*, 62.6, 62.0\*. **IR** (CH<sub>2</sub>Cl<sub>2</sub>):  $\nu_{\max}$  (cm<sup>-1</sup>) = 3120, 3051, 2977, 2927, 2833, 2273, 1731, 1621, 1516, 1342, 1266, 1180, 876, 792, 690, 626. **HRMS** (ESI<sup>+</sup>) calcd for C<sub>17</sub>H<sub>15</sub>Cl<sub>2</sub>N<sub>2</sub>O<sub>5</sub>S [M+H]<sup>+</sup>: 429.0073, Found: 429.0081.

**(2*R*,4*R*)-2-(3,4-dibromophenyl)-3-((4-nitrophenyl)sulfonyl)-4-vinyloxazolidine (3n)**

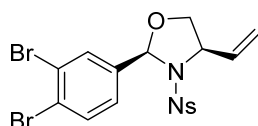

White solid; **m.p.**: 127 - 129 °C; 34% yield (35.0 mg); **HPLC** *ee*: 81% [Daicel CHIRALPAK IG-H (0.46 cm × 25cm); *n*-hexane/2-propanol = 90/10; flow rate = 1.0 mL/min; detection wavelength = 214 nm; *t*<sub>R</sub> = 28.22 (major), 34.21 (minor) min]. [ $\alpha$ ]<sub>D</sub><sup>20</sup> = + 22.8 (c 1.0, CHCl<sub>3</sub>). **<sup>1</sup>H NMR** (400 MHz, CDCl<sub>3</sub>)  $\delta$  8.35 (d, *J* = 8.8 Hz, 2H), 7.97 – 7.88 (m, 2H), 7.68 – 7.59 (m, 2H), 7.31 (dd, *J* = 8.3, 2.1 Hz, 1H), 6.14 (s, 1H), 5.76 – 5.64 (m, 1H), 5.33 (d, *J* = 17.1 Hz, 1H), 5.26 (d, *J* = 10.2 Hz, 1H), 4.40 (q, *J* = 6.8 Hz, 1H), 4.06 (dd, *J* = 9.2, 7.0 Hz, 1H), 3.74 (dd, *J* = 9.2, 5.6 Hz, 1H). **<sup>13</sup>C NMR** (101 MHz, CDCl<sub>3</sub>)  $\delta$  150.5, 143.9, 138.1, 134.8, 133.9, 132.4, 129.0, 127.6, 126.1, 125.2, 124.5, 119.7, 91.0, 71.1, 62.0. **IR** (CH<sub>2</sub>Cl<sub>2</sub>):  $\nu_{\max}$  (cm<sup>-1</sup>) = 3125, 3063, 2981, 2933, 2828, 2271, 1737, 1629, 1513, 1345, 1275, 1181, 870, 793, 688, 616. **HRMS** (ESI<sup>+</sup>) calcd for C<sub>17</sub>H<sub>15</sub>Br<sub>2</sub>N<sub>2</sub>O<sub>5</sub>S [M+H]<sup>+</sup>: 516.9063, Found: 516.90651.

**(2*R*,4*R*)-2-(3,4-dibromophenyl)-3-((4-nitrophenyl)sulfonyl)-4-vinyloxazolidine (3n')**

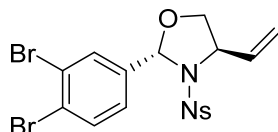

White solid; **m.p.**: 127 - 129 °C; 16% yield (16.4 mg); **HPLC** *ee*: 73% [Daicel CHIRALPAK IG-H (0.46 cm × 25cm); *n*-hexane/2-propanol = 90/10; flow rate = 1.0 mL/min; detection wavelength = 214 nm; *t*<sub>R</sub> = 31.97 (major), 39.71 (minor) min]. [ $\alpha$ ]<sub>D</sub><sup>20</sup> = - 17.9 (c 1.0, CHCl<sub>3</sub>). **<sup>1</sup>H NMR** (400 MHz, CDCl<sub>3</sub>)  $\delta$  8.24 (d, *J* = 8.8 Hz, 2H), 7.68 – 7.55 (m, 3H), 7.40 (d, *J* = 2.1 Hz, 1H), 7.23 (dd, *J* = 8.2, 2.1 Hz, 1H), 6.09 (s, 1H), 5.92 – 5.82 (m, 1H), 5.46 (d, *J* = 17.0 Hz, 1H), 5.34 (d, *J* = 10.1 Hz, 1H), 4.55 – 4.45 (m, 1H), 4.28 (dd, *J* = 8.9, 6.0 Hz, 1H), 3.87 (dd, *J* = 8.9, 5.2 Hz, 1H). **<sup>13</sup>C NMR** (101 MHz, CDCl<sub>3</sub>)  $\delta$  150.0, 145.9, 137.6, 133.9, 133.6, 132.9, 128.5, 128.4, 126.4, 125.0, 124.0, 119.9, 90.8, 71.7, 62.7. **IR** (CH<sub>2</sub>Cl<sub>2</sub>):  $\nu_{\max}$  (cm<sup>-1</sup>) = 3127, 3066, 2988, 2931, 2822, 2284, 1732, 1630, 1515, 1349, 1277, 1187, 875, 799, 681, 620. **HRMS** (ESI<sup>+</sup>) calcd for C<sub>17</sub>H<sub>15</sub>Br<sub>2</sub>N<sub>2</sub>O<sub>5</sub>S [M+Na]<sup>+</sup>: 516.9063, Found: 516.90651.

**(2,4*R*)-3-((4-nitrophenyl)sulfonyl)-2-(3,4,5-trichlorophenyl)-4-vinyloxazolidine (3o/3o')**

(\*: representative signals for the minor diastereoisomer)

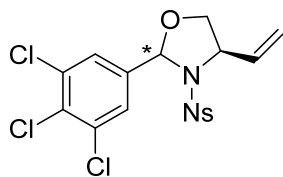

Pale yellow solid; **m.p.**: 133 - 135 °C; 51% yield (46.9 mg); **HPLC** *ee*: 85%/ 53% [Daicel CHIRALPAK IG-H (0.46 cm × 25cm); *n*-hexane/2-propanol = 90/10; flow rate = 1.0 mL/min; detection wavelength = 254 nm; *t*<sub>R</sub> = 19.88 (major), 24.49 (minor) min, *t*<sub>R</sub> = 16.50 (minor), 20.95 (major) min]. [ $\alpha$ ]<sub>D</sub><sup>20</sup> = +10.2 (c 1.0, CHCl<sub>3</sub>). **<sup>1</sup>H NMR** (400 MHz, CDCl<sub>3</sub>)  $\delta$  8.38 (d, *J* = 8.8 Hz, 2H), 8.25\* (d, *J* = 8.8 Hz, 2H), 7.98 (d, *J* = 8.8 Hz, 2H), 7.71\* (d, *J* = 8.5 Hz, 2H), 7.50 (s, 2H), 7.32\* (s, 2H), 6.14 (s, 1H), 6.07\* (s, 1H), 5.84 – 5.74 (m, 1H), 5.74 – 5.63\* (m, 1H), 5.44 (d, *J* = 17.1 Hz, 1H), 5.34 (d, *J* = 11.1 Hz, 1H), 5.32 – 5.25\* (m, 2H), 4.54 – 4.46 (m, 1H), 4.36\* (q, *J* = 7.3 Hz, 1H), 4.24 (dd, *J* = 9.0, 6.0 Hz, 1H), 4.04\* (dd, *J* = 9.2, 7.1 Hz, 1H), 3.84 (dd, *J* = 9.0, 4.9 Hz, 1H), 3.71\* (dd, *J* = 9.2, 6.0 Hz, 1H). **<sup>13</sup>C NMR** (151 MHz, CDCl<sub>3</sub>)  $\delta$  150.6, 150.1\*, 145.9, 143.4\*, 137.8, 137.3\*, 134.7, 134.5\*,

134.4, 133.5\*, 132.8, 132.5\*, 129.1, 128.6\*, 128.0, 127.4\*, 124.6, 124.0\*, 120.3, 119.9\*, 90.5, 90.3\*, 71.7, 71.1\*, 62.7, 62.0\*. **IR** (CH<sub>2</sub>Cl<sub>2</sub>):  $\nu_{\text{max}}$  (cm<sup>-1</sup>) = 3125, 3063, 2981, 2933, 2828, 2271, 1737, 1629, 1513, 1345, 1275, 1181, 870, 793, 688, 616. **HRMS** (ESI<sup>+</sup>) calcd for C<sub>17</sub>H<sub>14</sub>Cl<sub>3</sub>N<sub>2</sub>O<sub>5</sub>S [M+H]<sup>+</sup>: 462.9684, Found: 462.9671.

**(2,4*R*)-2-(benzofuran-2-yl)-3-((4-nitrophenyl)sulfonyl)-4-vinyloxazolidine (3p/3p')**

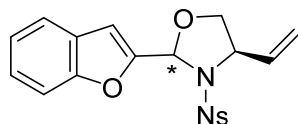

(\*: representative signals for the minor diastereoisomer)

White solid; **m.p.**: 134 - 137 °C; 68% yield (54.3 mg); **HPLC** *ee*: 11%/91% [Daicel CHIRALPAK AD-H (0.46 cm × 25cm); *n*-hexane/2-propanol = 90/10; flow rate = 1.0 mL/min; detection wavelength = 254 nm; *t<sub>R</sub>* = 22.88 (minor), 25.91 (major) min, *t<sub>R</sub>* = 29.92 (major), 35.63 (minor) min]. **[α]<sub>D</sub><sup>20</sup>** = +42.46 (c 1.0, CHCl<sub>3</sub>). **<sup>1</sup>H NMR** (400 MHz, CDCl<sub>3</sub>) δ 8.14 (d, *J* = 8.9 Hz, 2H), 7.85 (d, *J* = 8.9 Hz, 2H), 7.79 (d, *J* = 8.9 Hz, 2H), 7.56 (dt, *J* = 7.5, 1.7 Hz, 2H), 7.53 (d, *J* = 8.9 Hz, 2H), 7.35 – 7.30 (m, 1H), 7.30 – 7.27 (m, 1H), 7.25 – 7.16 (m, 2H), 6.96\* (d, *J* = 8.2 Hz, 1H), 6.90 – 6.84 (m, 2H), 6.38 (s, 1H), 6.27\* (s, 1H), 6.11 – 6.01\* (m, 1H), 5.90 (ddd, *J* = 17.1, 10.1, 8.3 Hz, 1H), 5.49\* (d, *J* = 17.1 Hz, 1H), 5.46 – 5.34 (m, 2H), 5.31 (dd, *J* = 10.1, 0.9 Hz, 1H), 4.60 – 4.50 (m, 3H), 4.29 – 4.21 (m, 1H), 4.03 – 3.97 (m, 2H). **<sup>13</sup>C NMR** (151 MHz, CDCl<sub>3</sub>) δ 155.3, 154.5\*, 151.7, 151.7\*, 150.1, 149.5\*, 144.5, 144.2\*, 135.4, 134.6\*, 128.9\*, 128.2, 127.1\*, 126.6, 125.8\*, 125.6, 124.0\*, 123.7, 123.5\*, 123.4, 122.0, 121.8\*, 120.2, 118.7\*, 111.5, 111.1\*, 108.8, 107.9\*, 86.1, 85.2\*, 73.1, 71.9\*, 62.1, 61.8\*. **IR** (CH<sub>2</sub>Cl<sub>2</sub>):  $\nu_{\text{max}}$  (cm<sup>-1</sup>) = 3123, 3058, 2980, 2921, 2829, 2279, 1731, 1610, 1520, 1344, 1266, 1181, 876, 798, 690, 622. **HRMS** (ESI<sup>+</sup>) calcd for C<sub>19</sub>H<sub>16</sub>N<sub>2</sub>NaO<sub>6</sub>S [M+Na]<sup>+</sup>: 423.0621, Found: 423.0614.

## 5. General procedure for the synthesis of 4 and 5

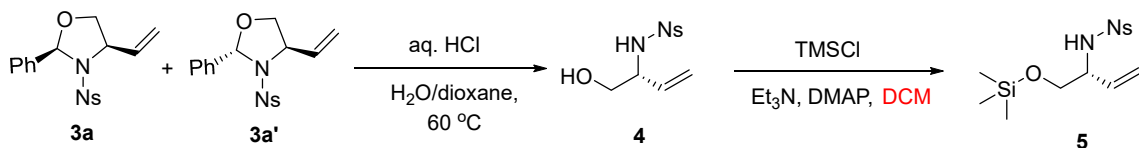

To a solution of (2, 4*R*)-3-((4-nitrophenyl)sulfonyl)-2-phenyl-4-vinyloxazolidine (**3a/3a'**) (36 mg, 0.1 mmol) in 1,4-dioxane/water (2:1, 1.5 mL) was added hydrochloric acid (20 μL of 6 N solution, 0.1 mmol) at room temperature. The reaction mixture was stirred at 60 °C for 12 h. The mixture was then cooled, neutralized with aqueous sodium bicarbonate and extracted with ethyl acetate, dried over anhydrous Na<sub>2</sub>SO<sub>4</sub>, filtered and concentrated. The residue was purified by flash chromatography (eluent: petroleum ether / ethyl acetate = 2/1) on silica to afford the product **4** (22 mg, 81%) as a white solid.

A round bottom flask equipped with a magnetic stir bar was charged with (*R*)-*N*-(1-hydroxybut-3-en-2-yl)-4-nitrobenzenesulfonamide **4** (27.2 mg, 0.1 mmol), and then CH<sub>2</sub>Cl<sub>2</sub> (2 mL) was added via a glass syringe and followed by the addition of Et<sub>3</sub>N (28 μL, 0.2 mmol), DMAP (5.0 mg) and chlorotrimethylsilane (14 μL, 0.11 mmol). The resulting reaction mixture was stirred for 12 h at room temperature. Then quenched with water (10.0 mL) and extracted with CH<sub>2</sub>Cl<sub>2</sub> (20 mL). The combined organic layers were washed with

brine and dried over anhydrous Na<sub>2</sub>SO<sub>4</sub>, filtered and concentrated. The crude product was purified by flash column chromatography (eluent: petroleum ether / ethyl acetate = 5/1) as eluent to afford the pure product **5** in 76% yield as a yellow oil.

**(R)-N-(1-hydroxybut-3-en-2-yl)-4-nitrobenzenesulfonamide (4)**

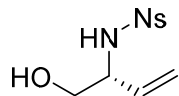

White solid; **m.p.**: 102 - 104 °C; 81% yield (22.0 mg); **HPLC** *ee*: 95% [Daicel CHIRALCEL OJ-H (0.46 cm × 25 cm); *n*-hexane/2-propanol = 90/10; flow rate = 1.0 mL/min; detection wavelength = 254 nm; *t<sub>R</sub>* = 60.15 (minor), 62.01 (major) min]. [ $\alpha$ ]<sup>20</sup><sub>D</sub> = + 11.89 (c 1.0, CHCl<sub>3</sub>). **<sup>1</sup>H NMR** (400 MHz, CD<sub>3</sub>CN)  $\delta$  8.32 (d, *J* = 8.9 Hz, 2H), 8.03 (d, *J* = 8.9 Hz, 2H), 6.06 (d, *J* = 8.0 Hz, 1H), 5.61 (ddd, *J* = 17.1, 10.5, 6.5 Hz, 1H), 5.10 – 4.94 (m, 2H), 3.91 – 3.80 (m, 1H), 3.46 – 3.35 (m, *J* = 5.7 Hz, 2H), 2.91 (t, *J* = 5.9 Hz, 1H). **<sup>13</sup>C NMR** (151 MHz, CD<sub>3</sub>CN)  $\delta$  151.0, 148.1, 136.0, 129.2, 125.1, 117.7, 65.0, 59.4. **IR** (CH<sub>2</sub>Cl<sub>2</sub>):  $\nu_{\text{max}}$  (cm<sup>-1</sup>) = 3441, 3203, 3018, 2780, 2621, 2229, , 1730, 1601, 1511, 1321, 1209, 1129, 870, 766. **HRMS** (ESI<sup>+</sup>) calcd for C<sub>10</sub>H<sub>12</sub>N<sub>2</sub>NaO<sub>5</sub>S [M+Na]<sup>+</sup>: 295.0359, Found: 295.03551.

**(R)-4-nitro-N-(1-((trimethylsilyl)oxy)but-3-en-2-yl)benzenesulfonamide (5)**

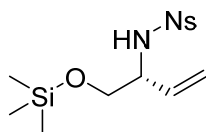

Yellow oil; 76% yield (26.0 mg); **HPLC** *ee*: 95% [Daicel CHIRALPAK AD-H (0.46 cm × 25cm); *n*-hexane/2-propanol = 90/10; flow rate = 1.0 mL/min; detection wavelength = 254 nm; *t<sub>R</sub>* = 8.23 (minor), 9.81 (major) min]. [ $\alpha$ ]<sup>20</sup><sub>D</sub> = + 12.51 (c 1.0, CHCl<sub>3</sub>). **<sup>1</sup>H NMR** (400 MHz, CDCl<sub>3</sub>)  $\delta$  8.33 (d, *J* = 8.7 Hz, 2H), 8.05 (d, *J* = 8.7 Hz, 2H), 5.60 (ddd, *J* = 17.1, 10.1, 6.8 Hz, 1H), 5.19 – 5.06 (m, 2H), 3.91 – 3.85 (m, 1H), 3.59 (dd, *J* = 10.2, 4.3 Hz, 1H), 3.49 (dd, *J* = 10.1, 5.6 Hz, 1H), 0.06 (s, 9H). **<sup>13</sup>C NMR** (151 MHz, CDCl<sub>3</sub>)  $\delta$  150.1, 146.9, 134.7, 128.6, 124.2, 118.2, 64.8, 58.0. **IR** (CH<sub>2</sub>Cl<sub>2</sub>):  $\nu_{\text{max}}$  (cm<sup>-1</sup>) = 3113, 3057, 2983, 2920, 2810, 2226, 1730, 1609, 1511, 1320, 1268, 1181, 876, 790, 687. **HRMS** (ESI<sup>+</sup>) calcd for C<sub>13</sub>H<sub>21</sub>N<sub>2</sub>O<sub>5</sub>SSi [M+H]<sup>+</sup>: 345.0935, Found: 345.0939.

## 6. X-ray crystallographic information of 3b

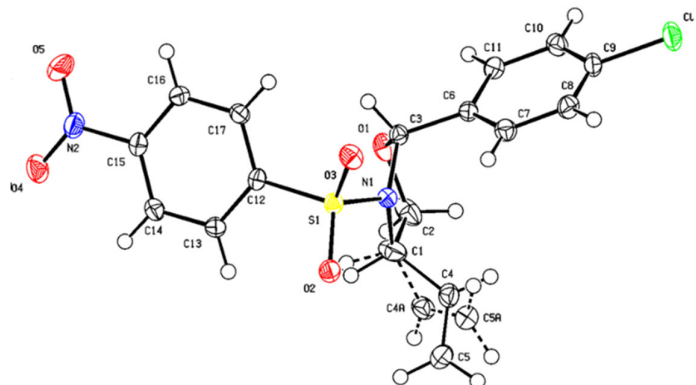

**Table S1. Crystal data and structure refinement for compound 3b. (CCDC: 2265381)**  
 CCDC 2265381 (**3b**) contains the supplementary crystallographic data for this paper. These data can be obtained free of charge from The Cambridge Crystallographic Data Centre via [www.ccdc.cam.ac.uk/data\\_request/cif](http://www.ccdc.cam.ac.uk/data_request/cif).

|                                             |                                                                   |
|---------------------------------------------|-------------------------------------------------------------------|
| Empirical formula                           | C <sub>17</sub> H <sub>15</sub> ClN <sub>2</sub> O <sub>5</sub> S |
| Formula weight                              | 394.82                                                            |
| Temperature/K                               | 100.00                                                            |
| Crystal system                              | orthorhombic                                                      |
| Space group                                 | P2 <sub>1</sub> 2 <sub>1</sub> 2 <sub>1</sub>                     |
| a/Å                                         | 7.3445(4)                                                         |
| b/Å                                         | 10.0239(4)                                                        |
| c/Å                                         | 23.4723(12)                                                       |
| $\alpha$ /°                                 | 90                                                                |
| $\beta$ /°                                  | 90                                                                |
| $\gamma$ /°                                 | 90                                                                |
| Volume/Å <sup>3</sup>                       | 1728.04(15)                                                       |
| Z                                           | 4                                                                 |
| $\rho_{\text{calc}}$ /cm <sup>3</sup>       | 1.518                                                             |
| $\mu$ /mm <sup>-1</sup>                     | 0.374                                                             |
| F(000)                                      | 816.0                                                             |
| Crystal size/mm <sup>3</sup>                | 0.26 × 0.17 × 0.05                                                |
| Radiation                                   | MoK $\alpha$ ( $\lambda$ = 0.71073)                               |
| 2 $\Theta$ range for data collection/°      | 5.344 to 55.046                                                   |
| Index ranges                                | -9 ≤ h ≤ 9, -12 ≤ k ≤ 13, -30 ≤ l ≤ 30                            |
| Reflections collected                       | 34022                                                             |
| Independent reflections                     | 3960 [R <sub>int</sub> = 0.0631, R <sub>sigma</sub> = 0.0330]     |
| Data/restraints/parameters                  | 3960/57/254                                                       |
| Goodness-of-fit on F <sup>2</sup>           | 1.063                                                             |
| Final R indexes [I ≥ 2 $\sigma$ (I)]        | R <sub>1</sub> = 0.0315, wR <sub>2</sub> = 0.0681                 |
| Final R indexes [all data]                  | R <sub>1</sub> = 0.0368, wR <sub>2</sub> = 0.0711                 |
| Largest diff. peak/hole / e Å <sup>-3</sup> | 0.31/-0.32                                                        |
| Flack parameter                             | -0.01(3)                                                          |

## 7. Copies of NMR spectra of compounds L1-L6, 3 / 3', 4 and 5

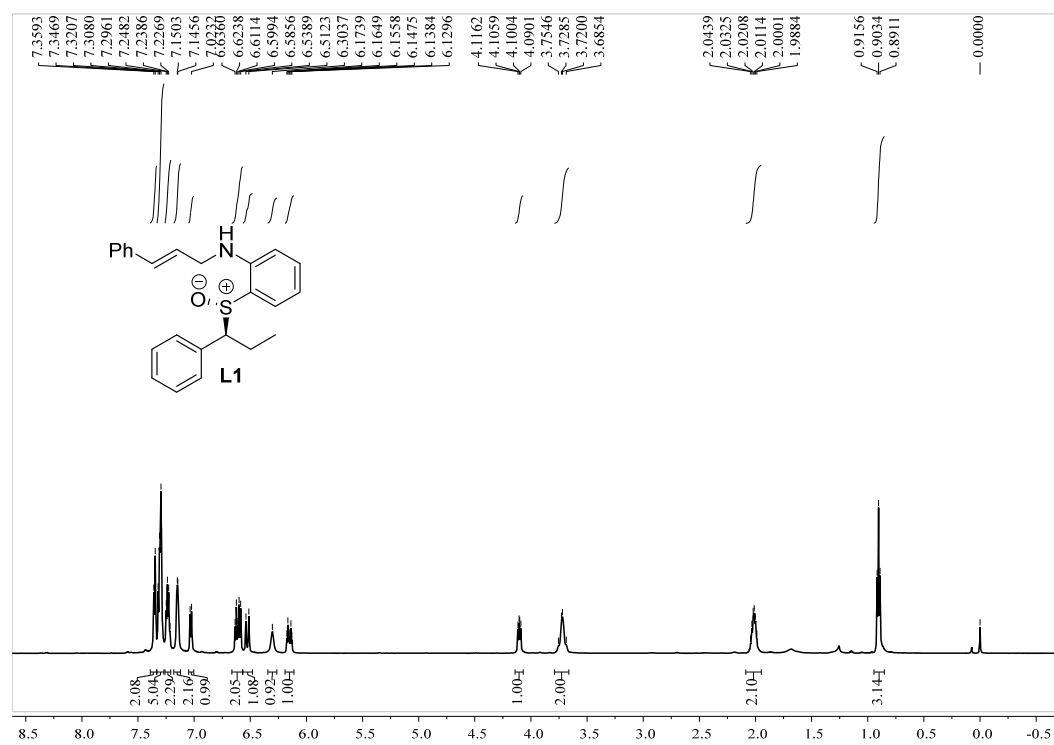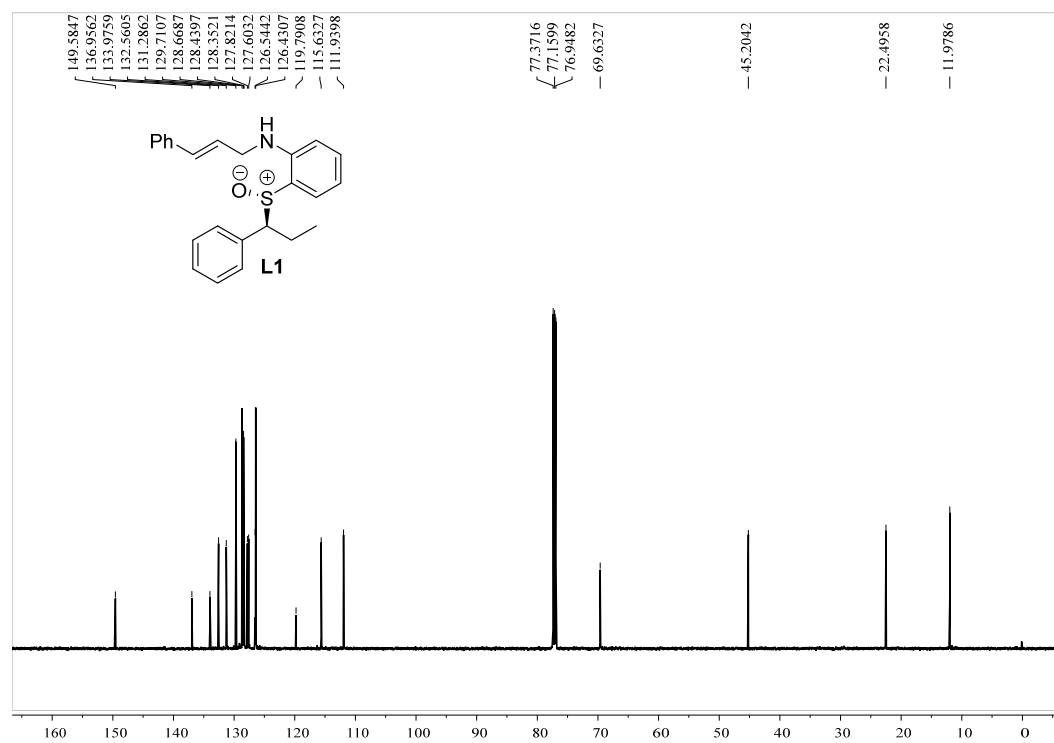

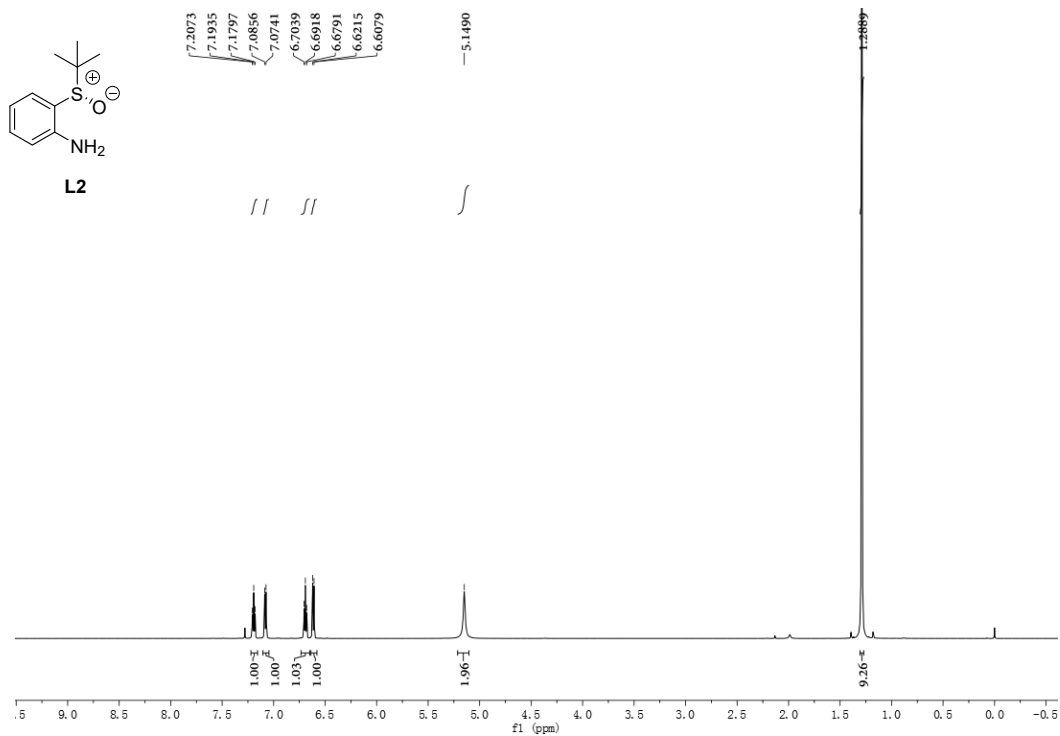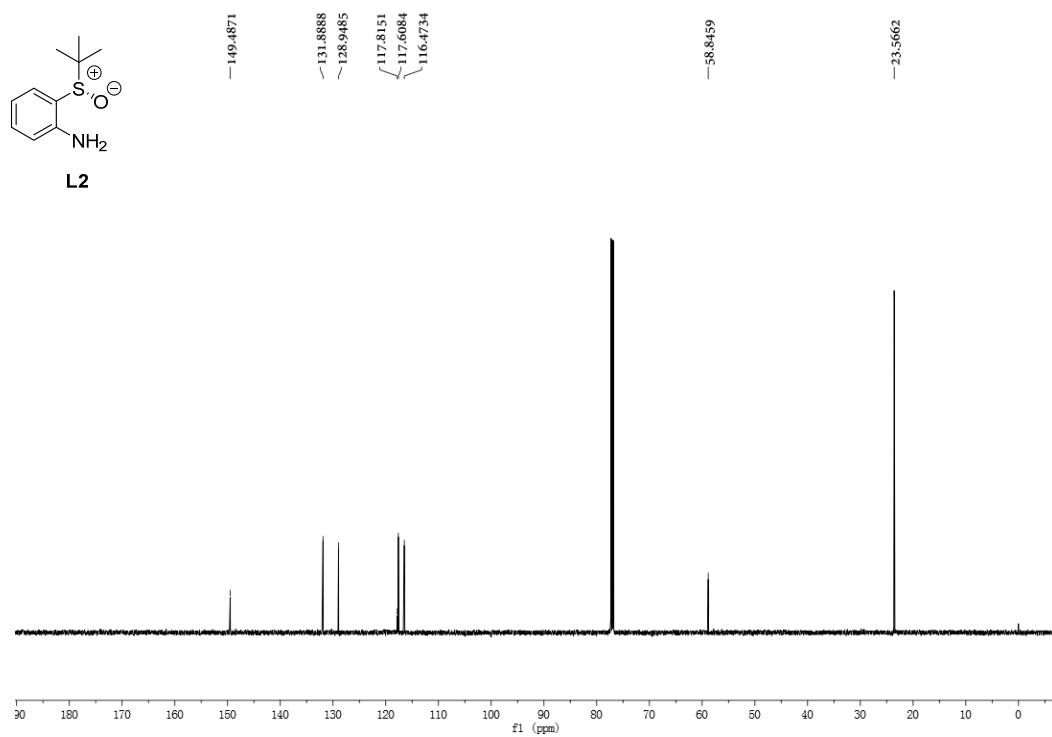



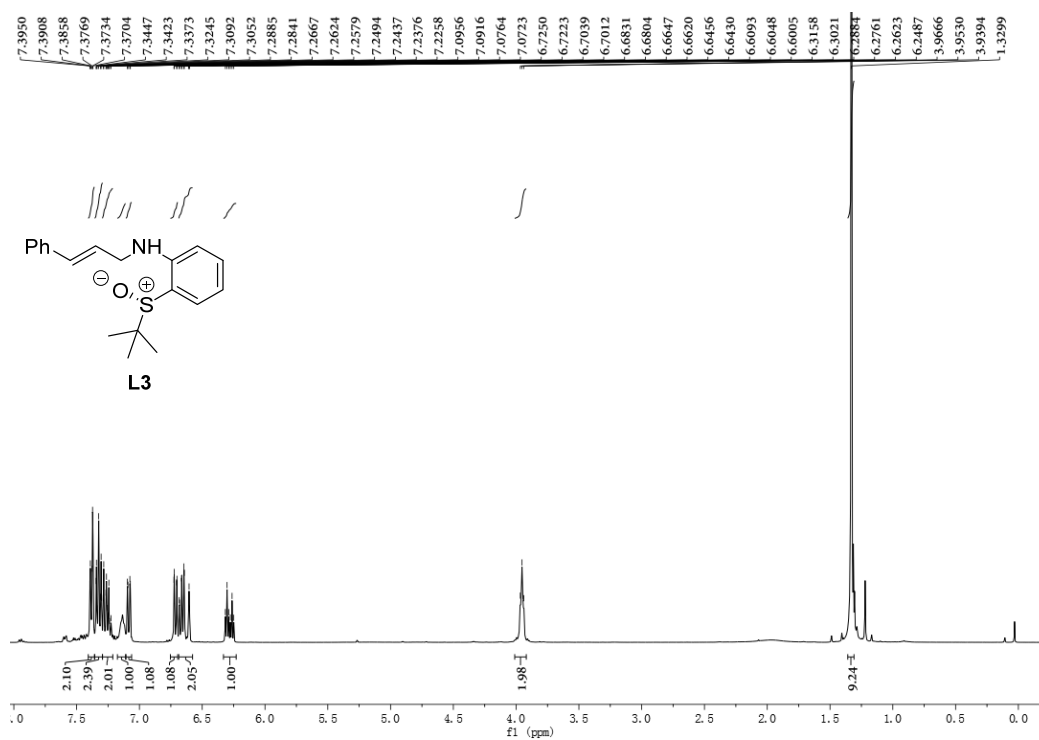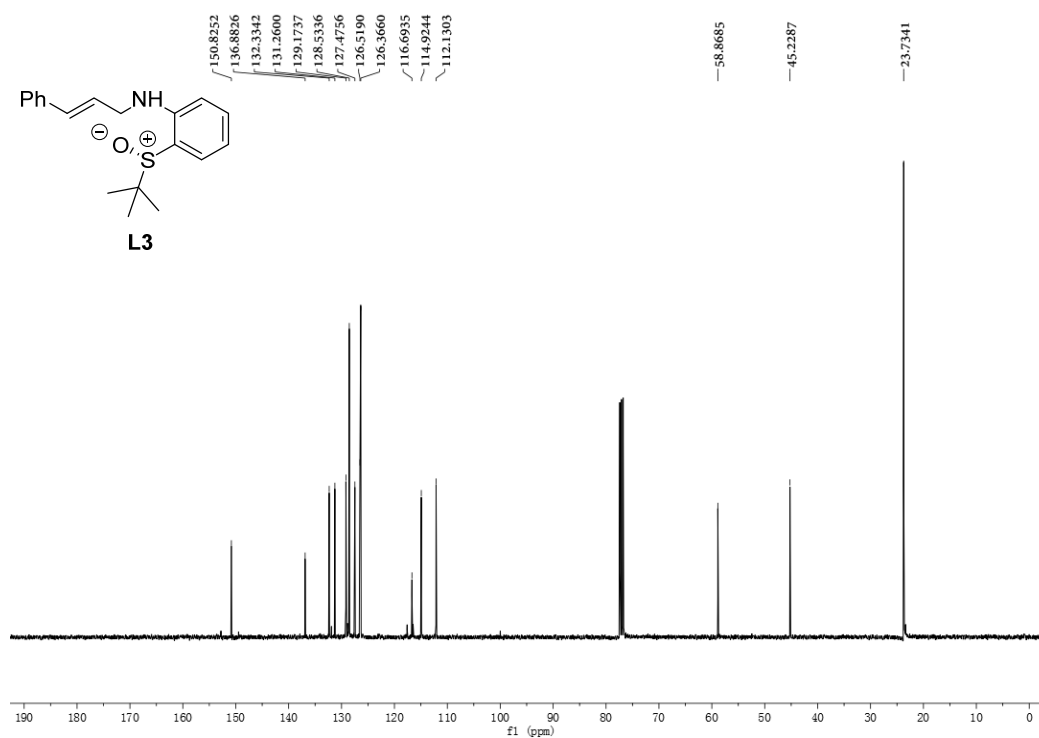

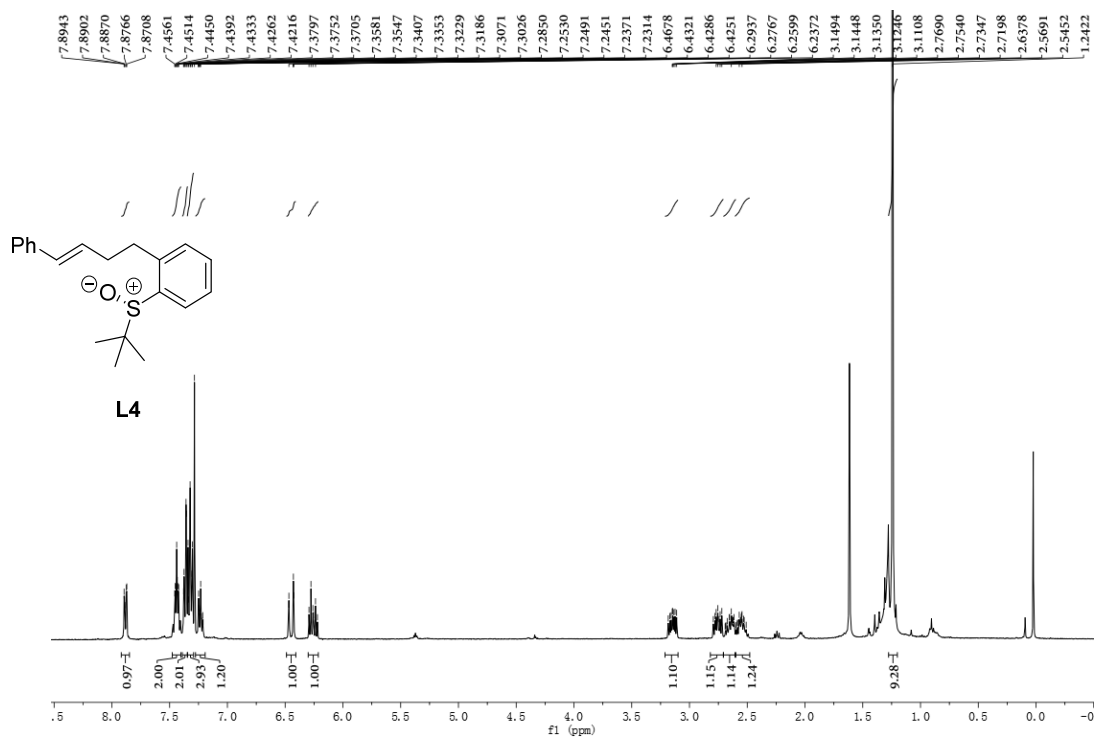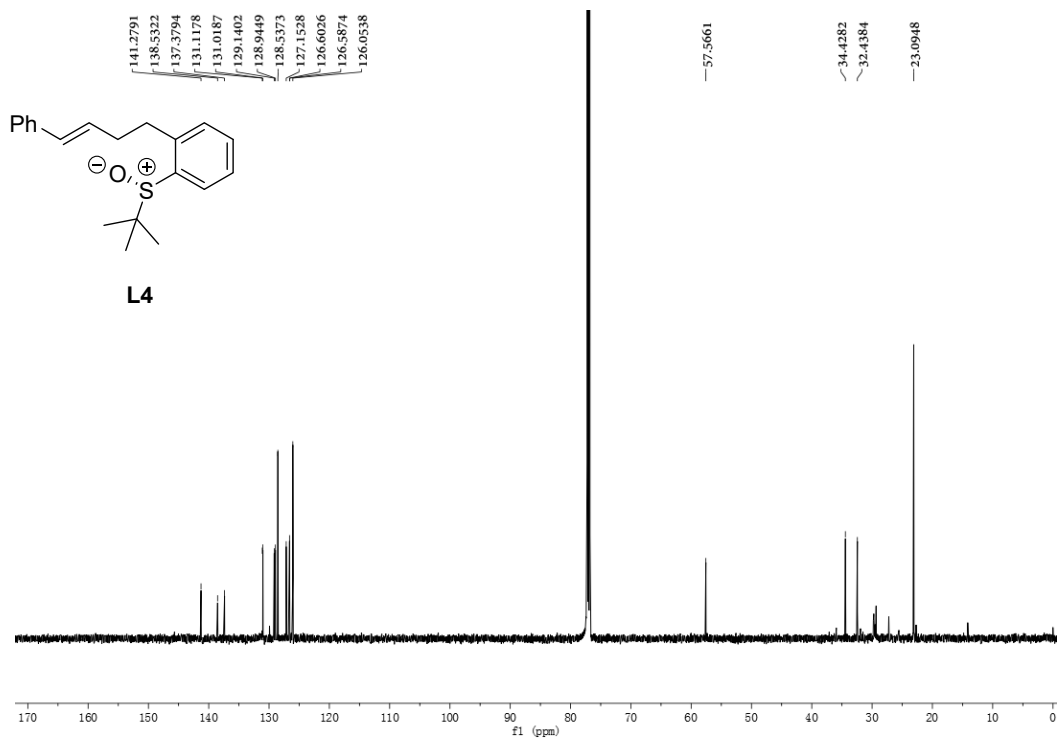

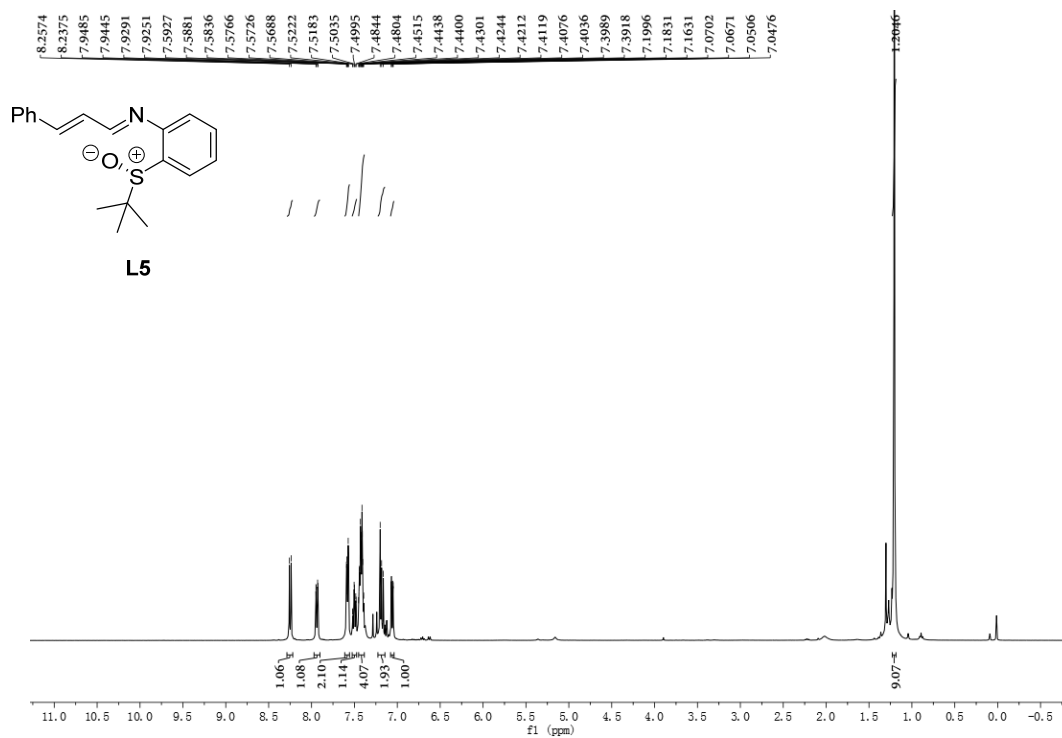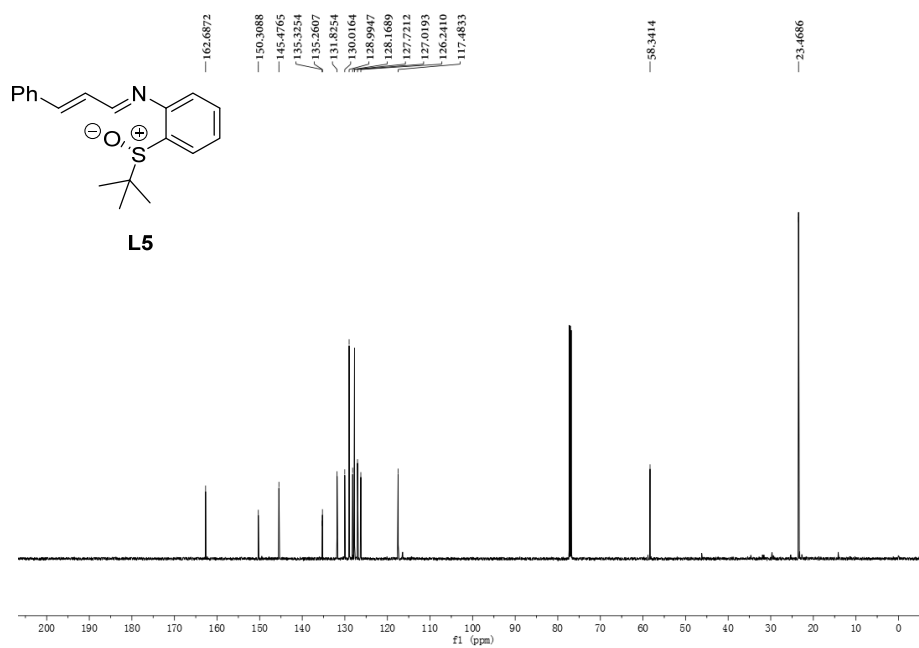

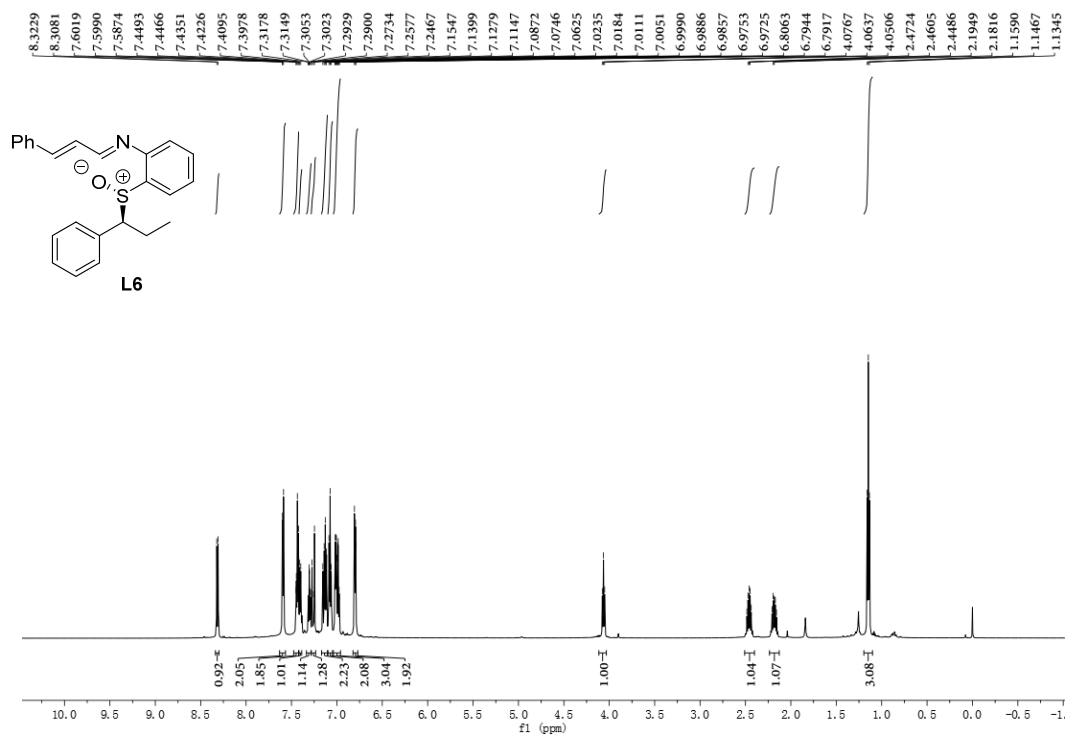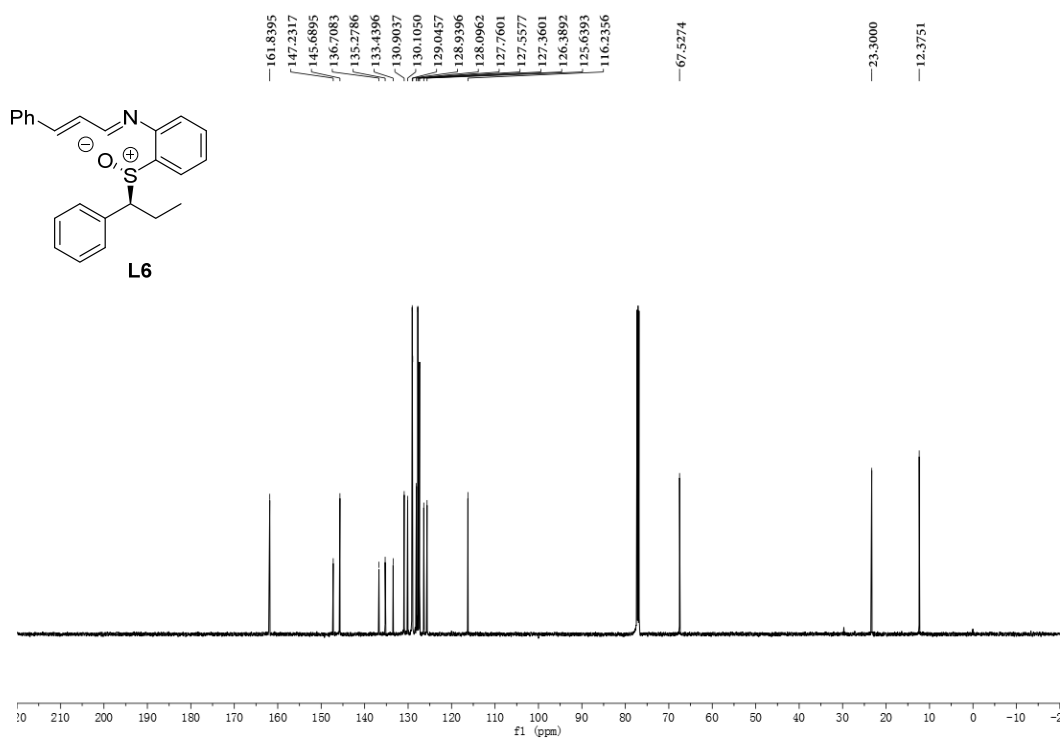

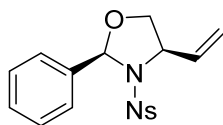

**3a**

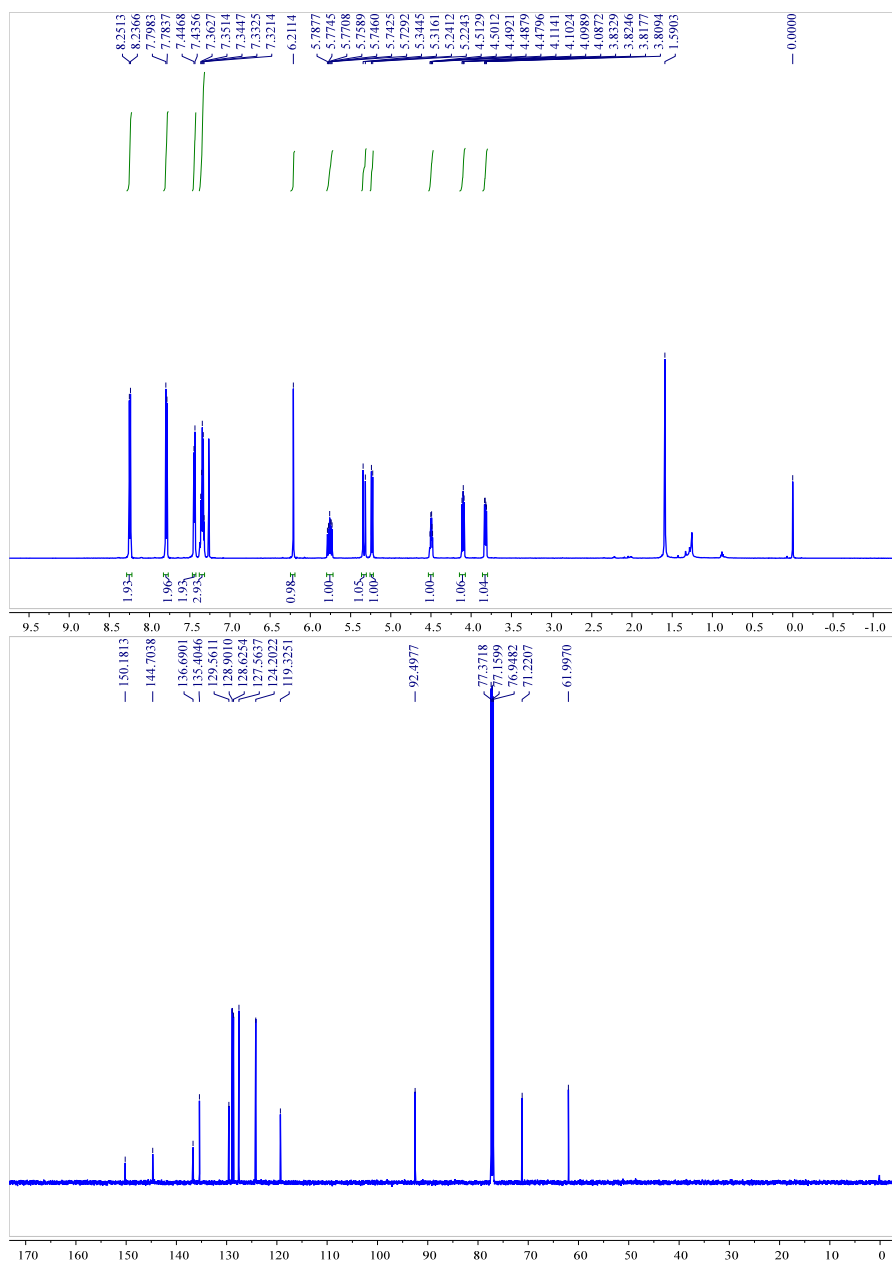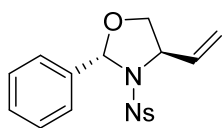

**3a'**

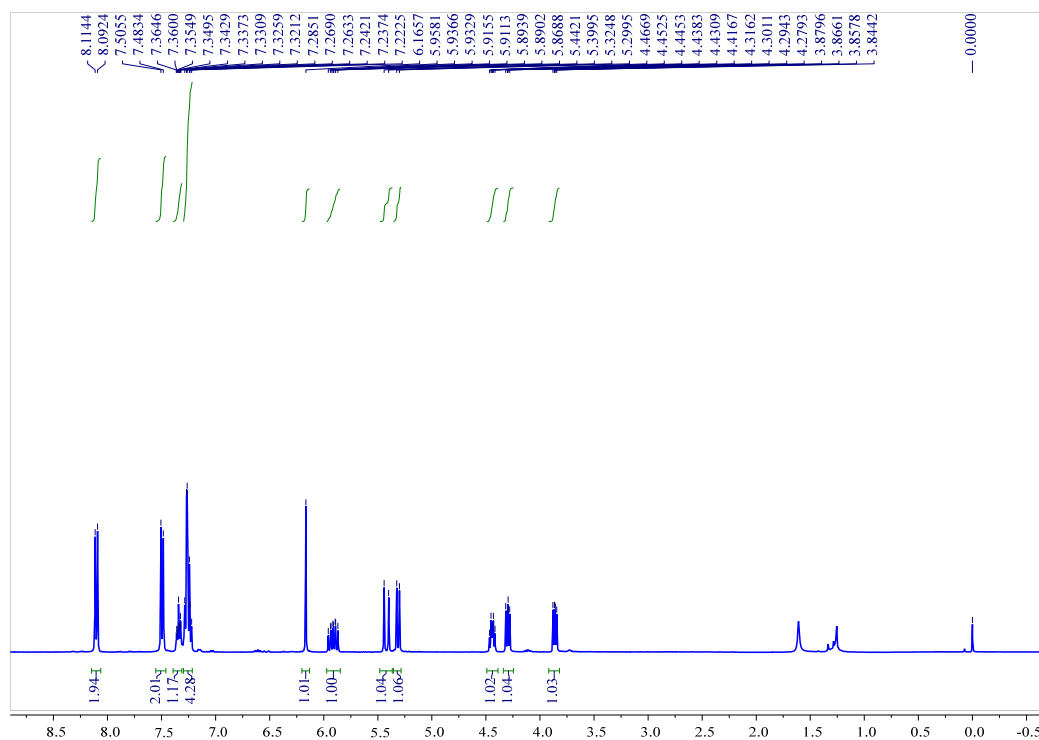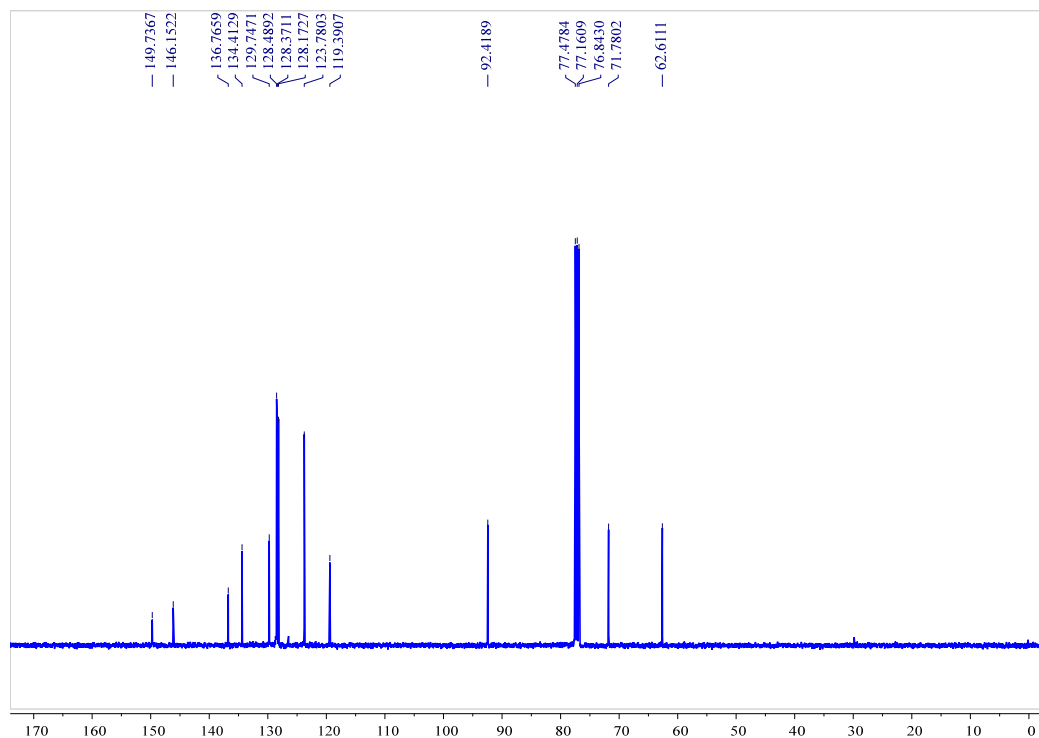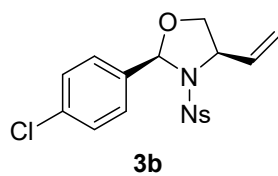

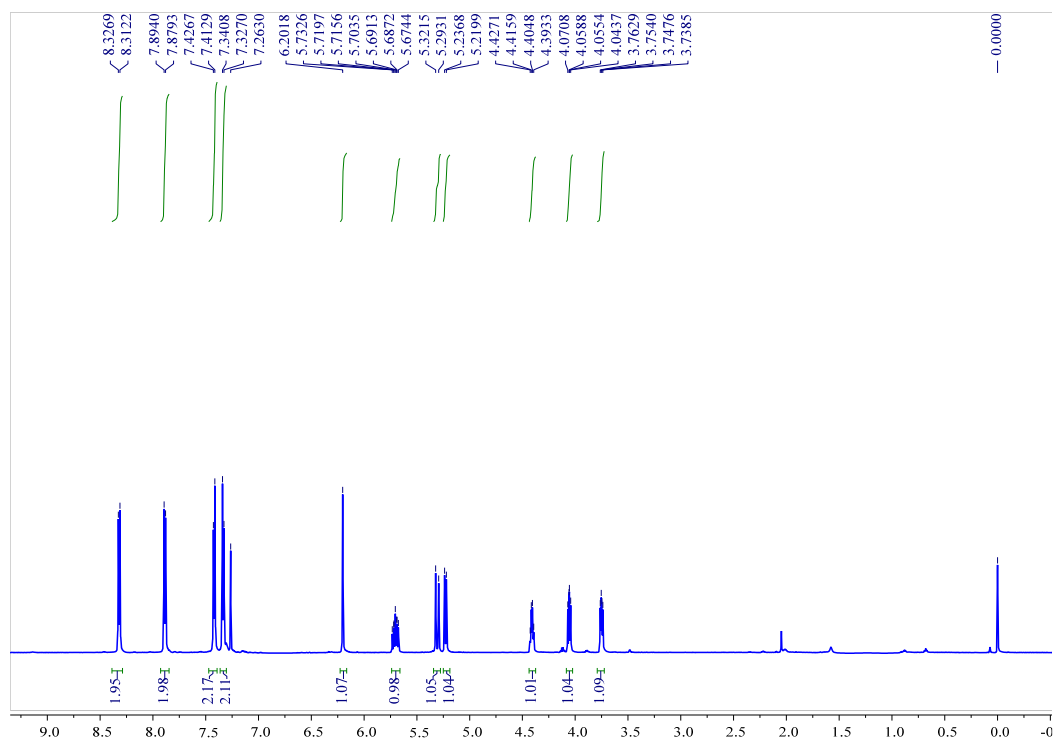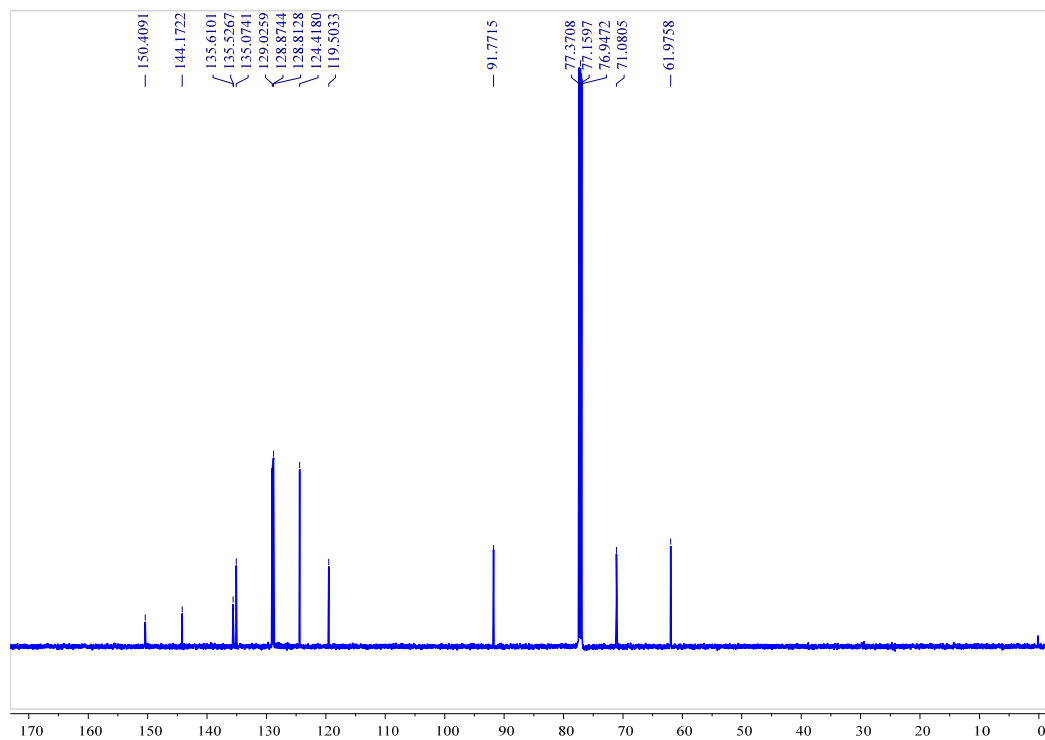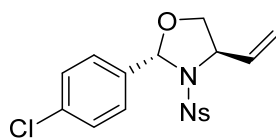

**3b'**

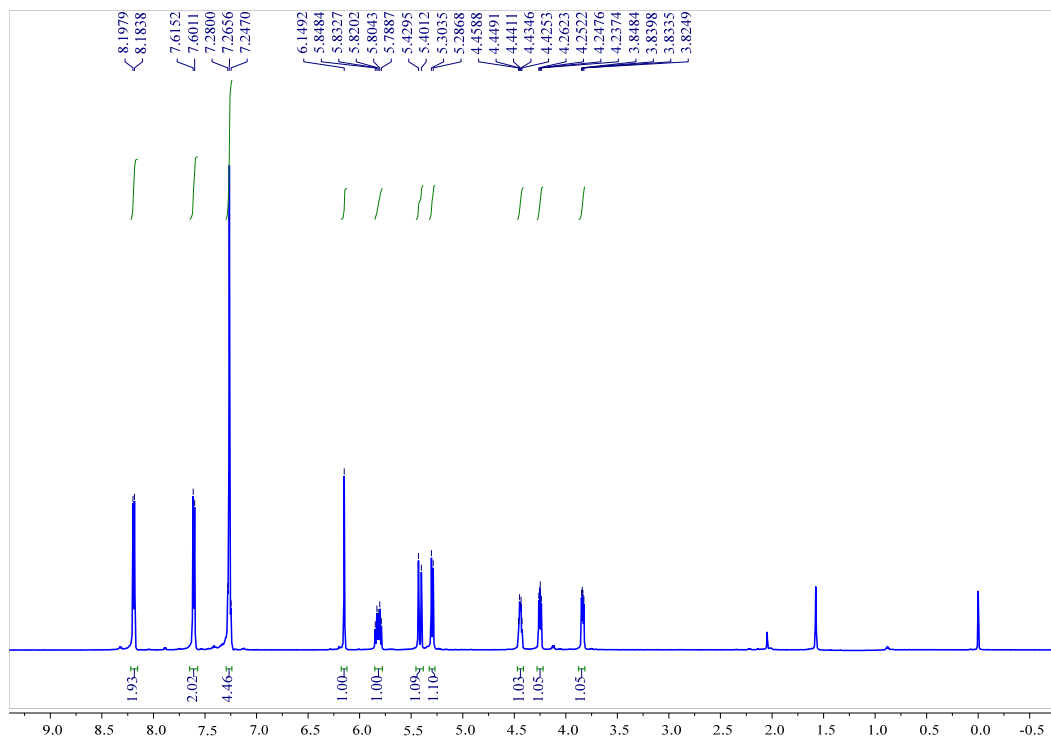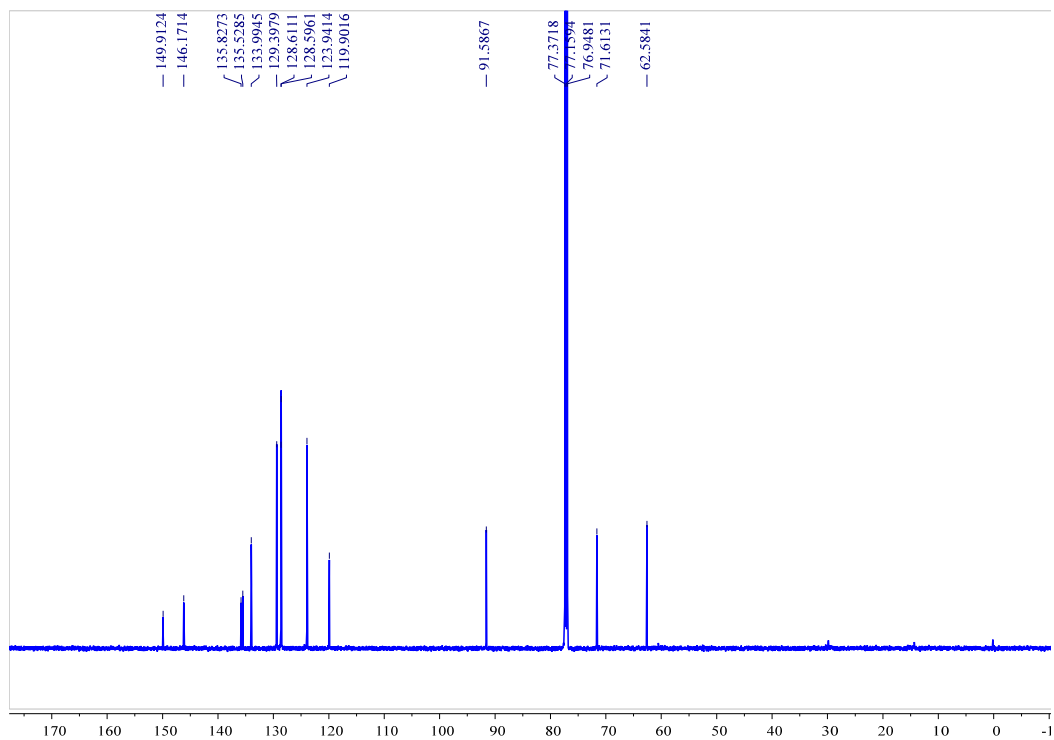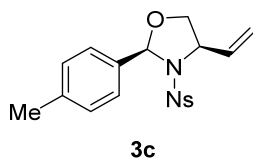



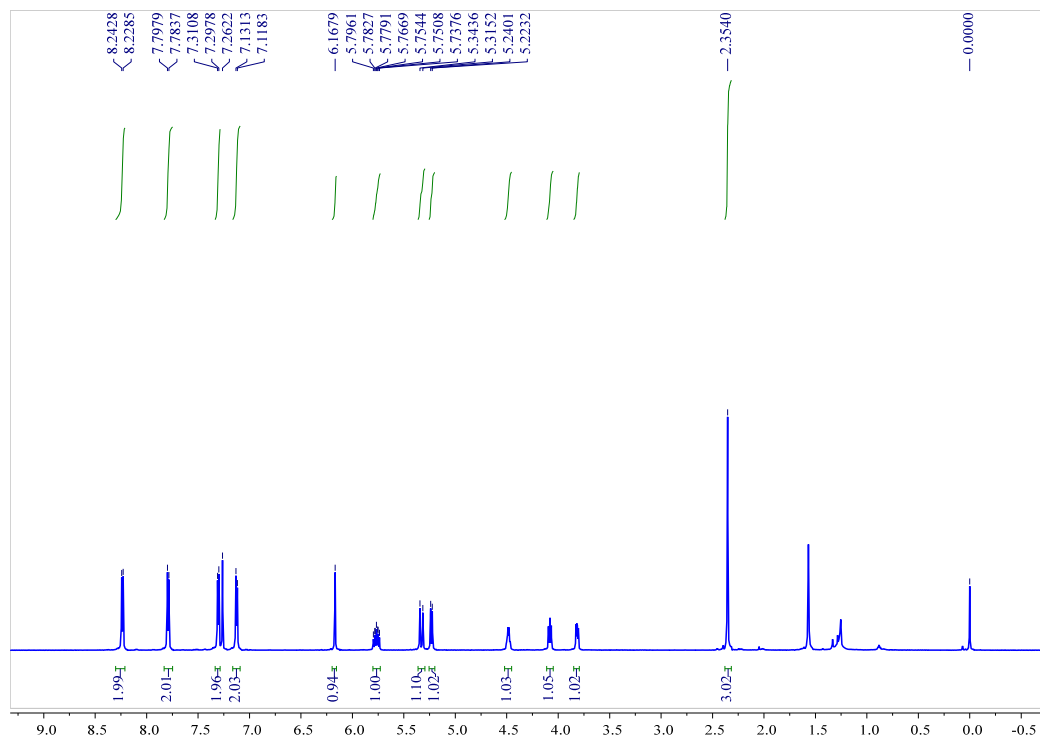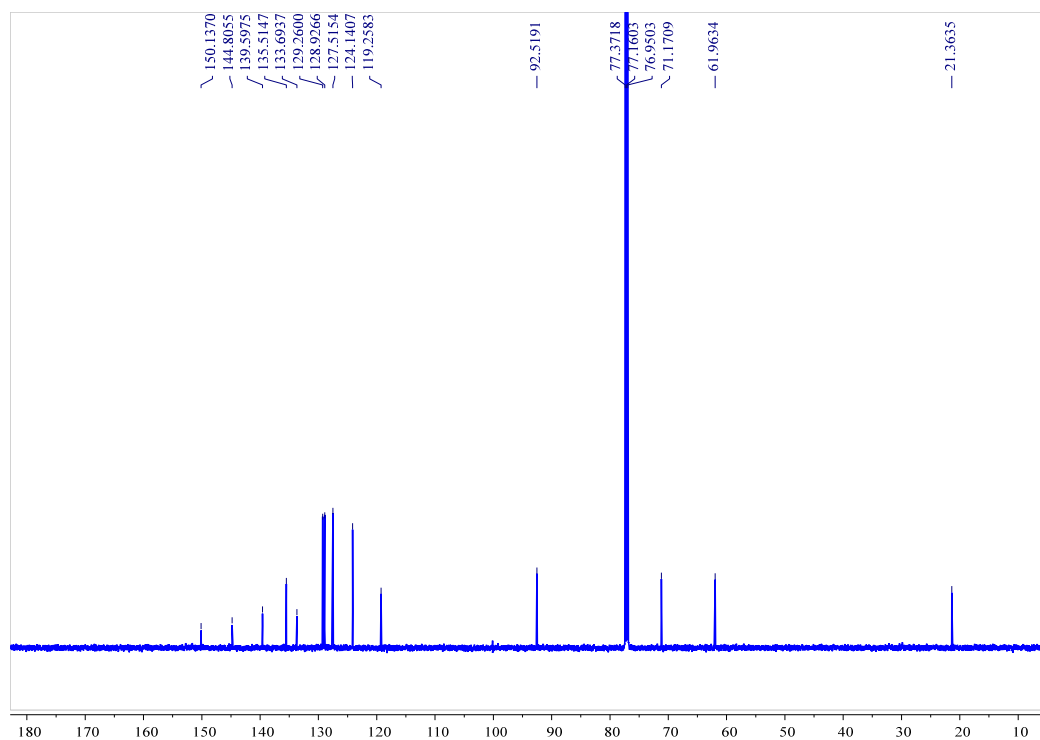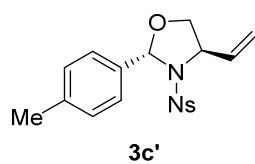

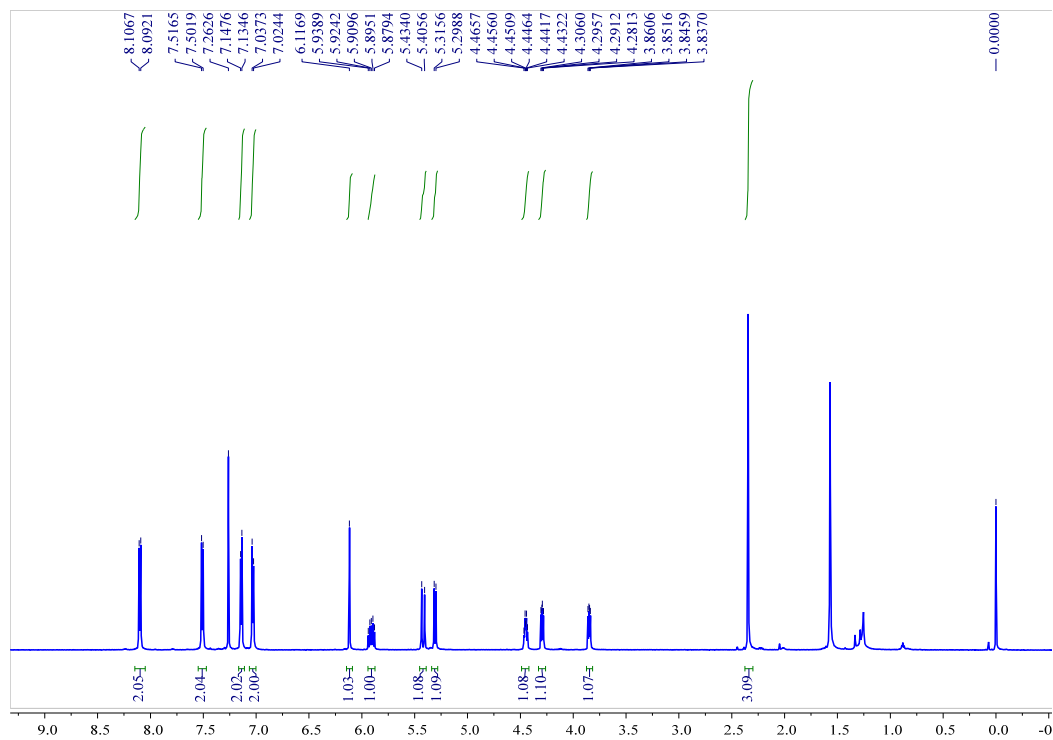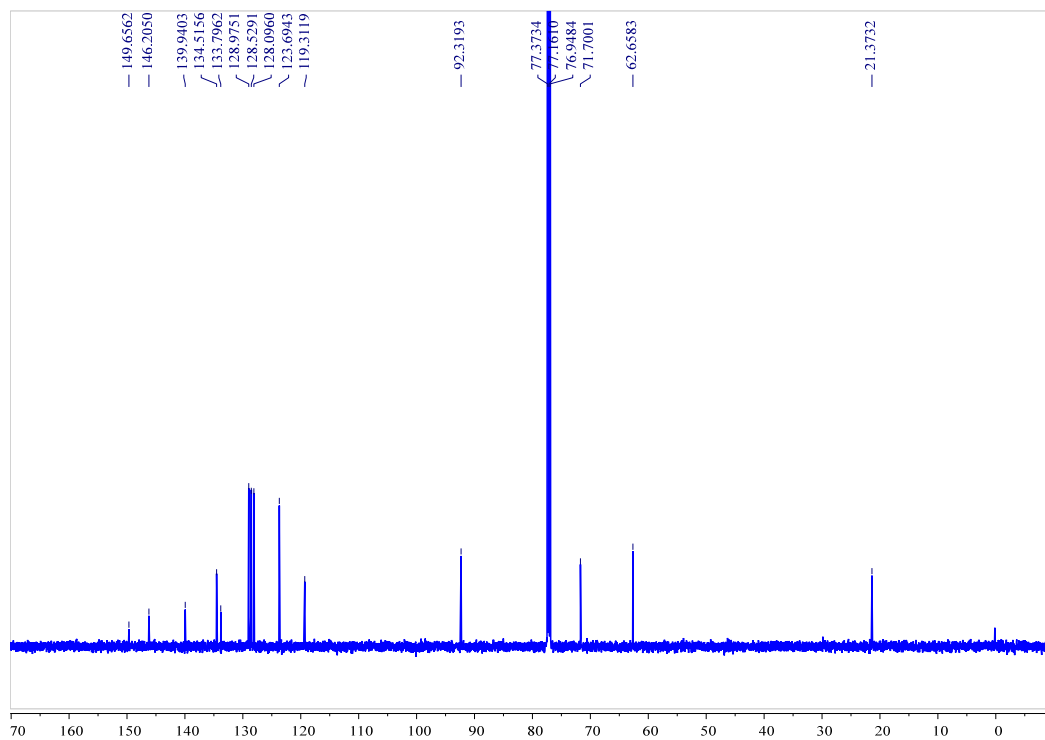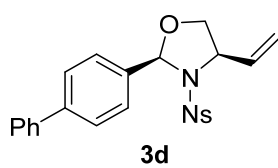

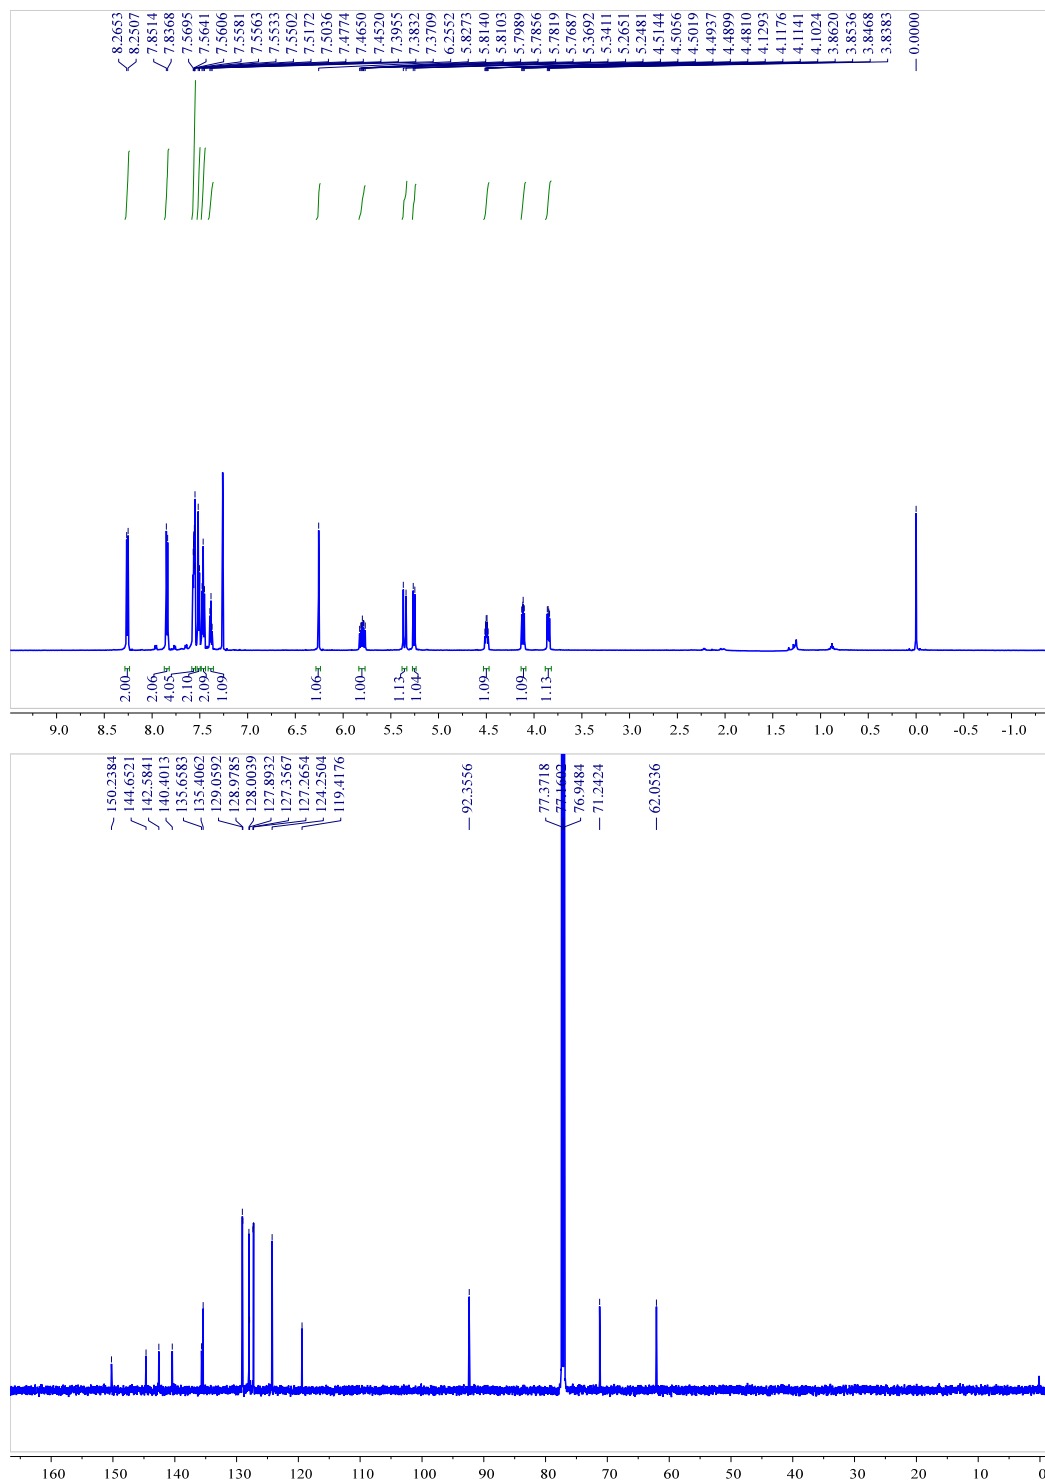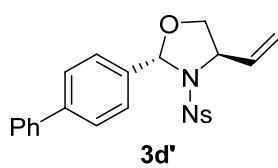

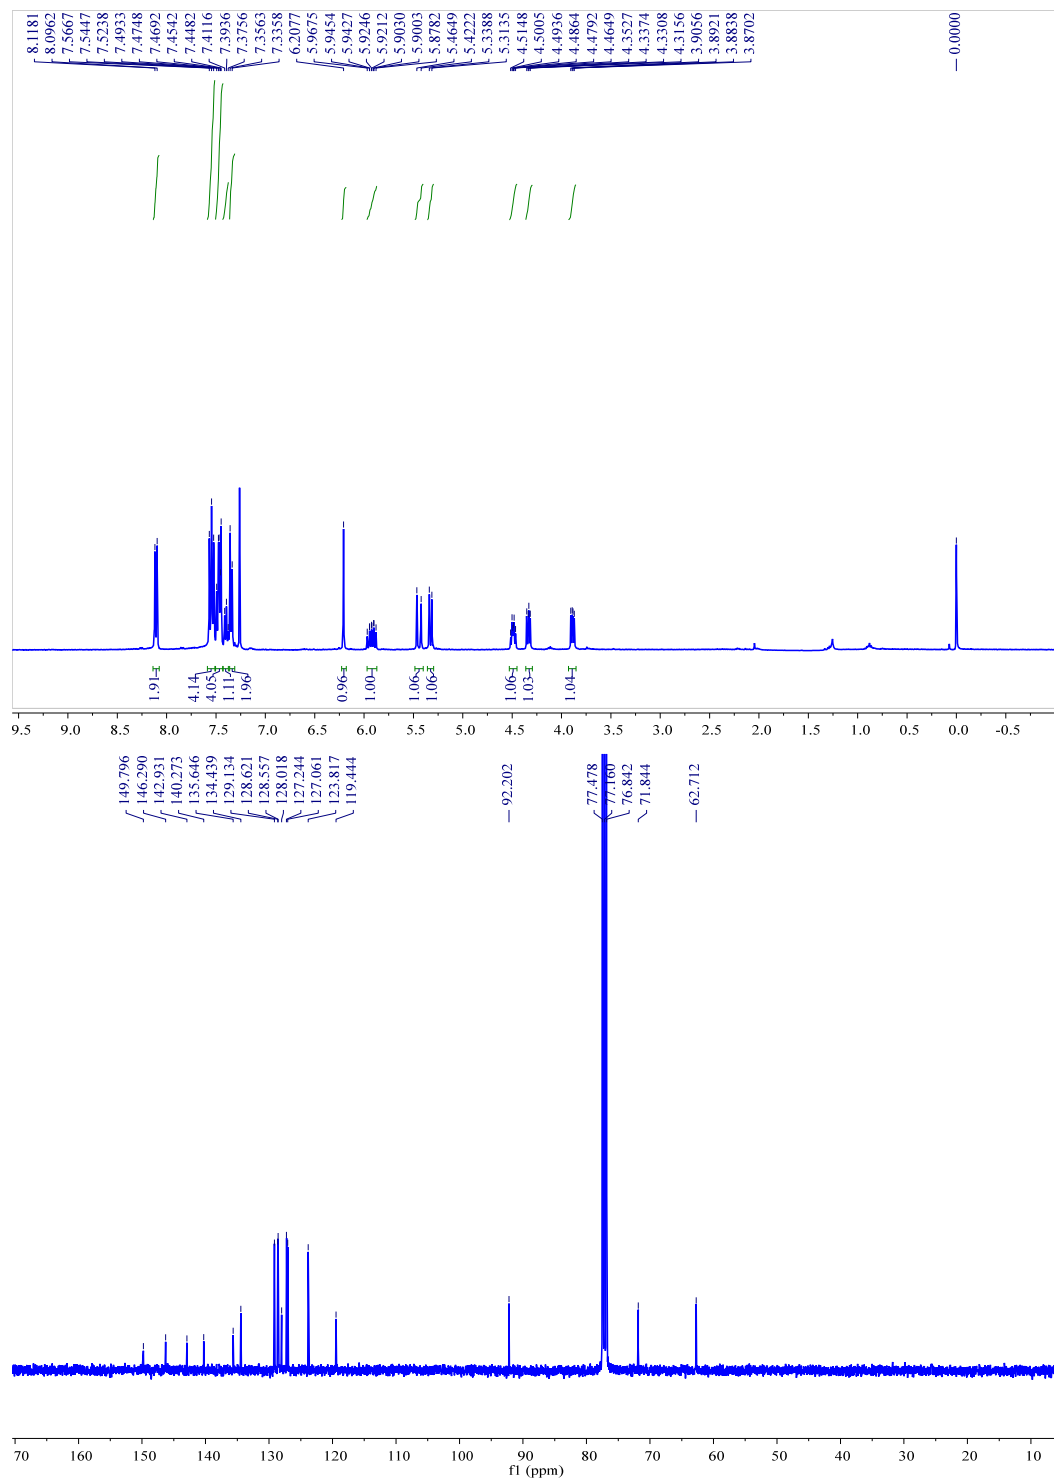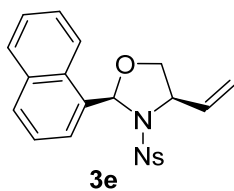

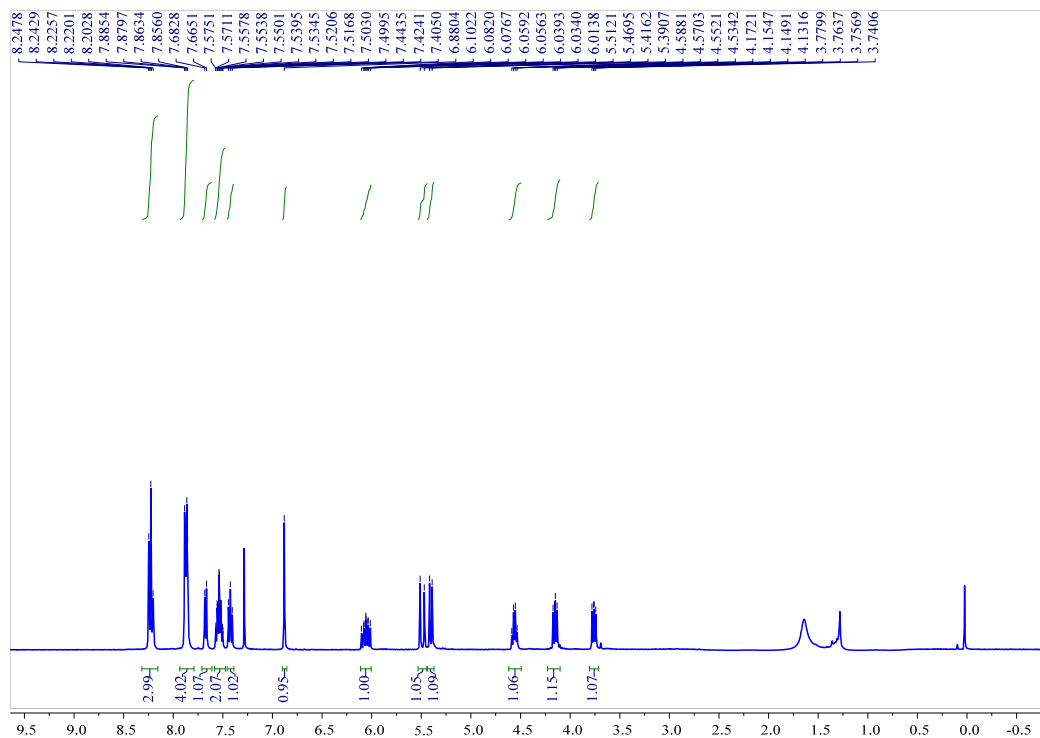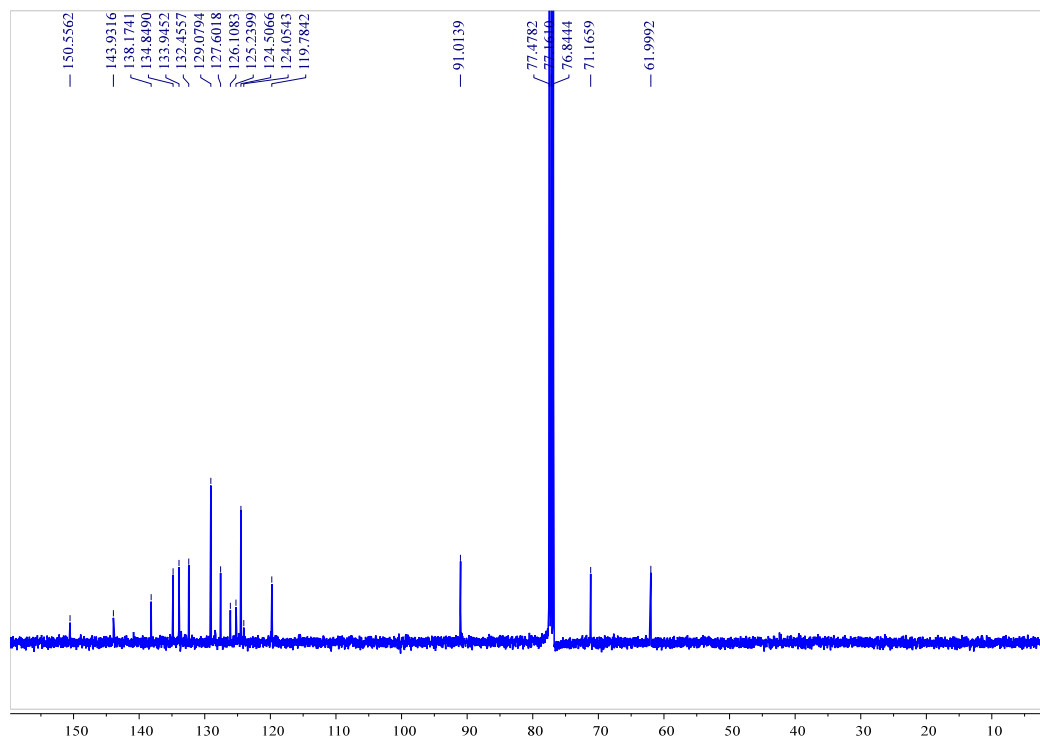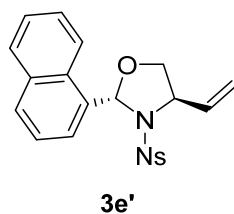

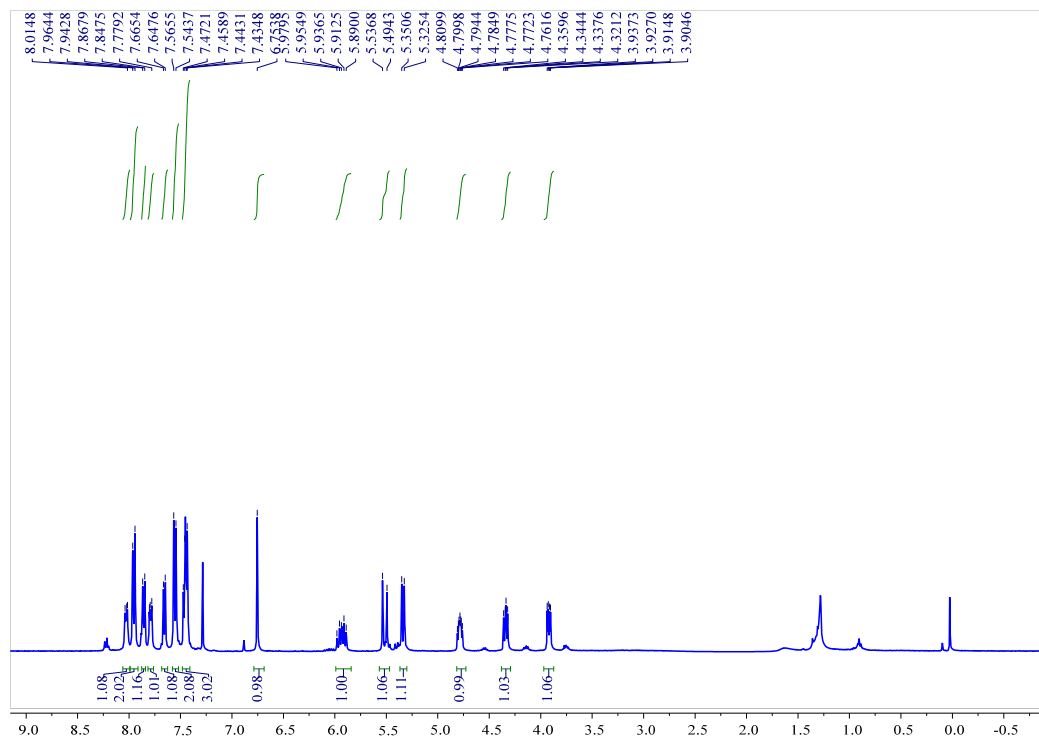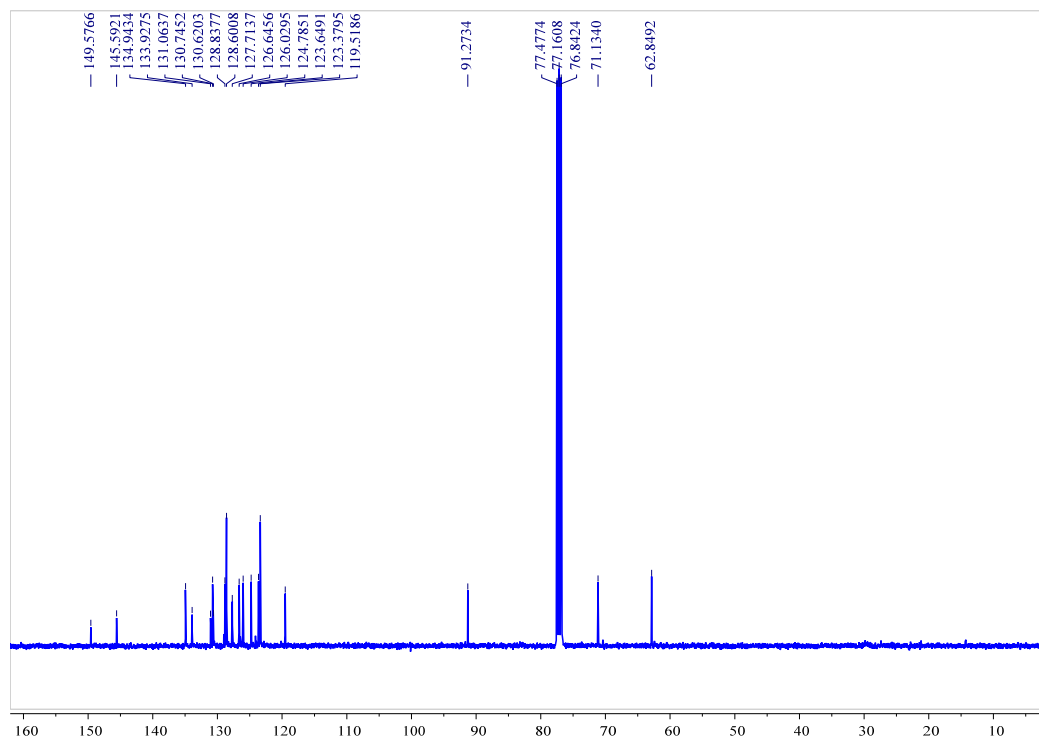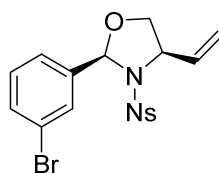

3f

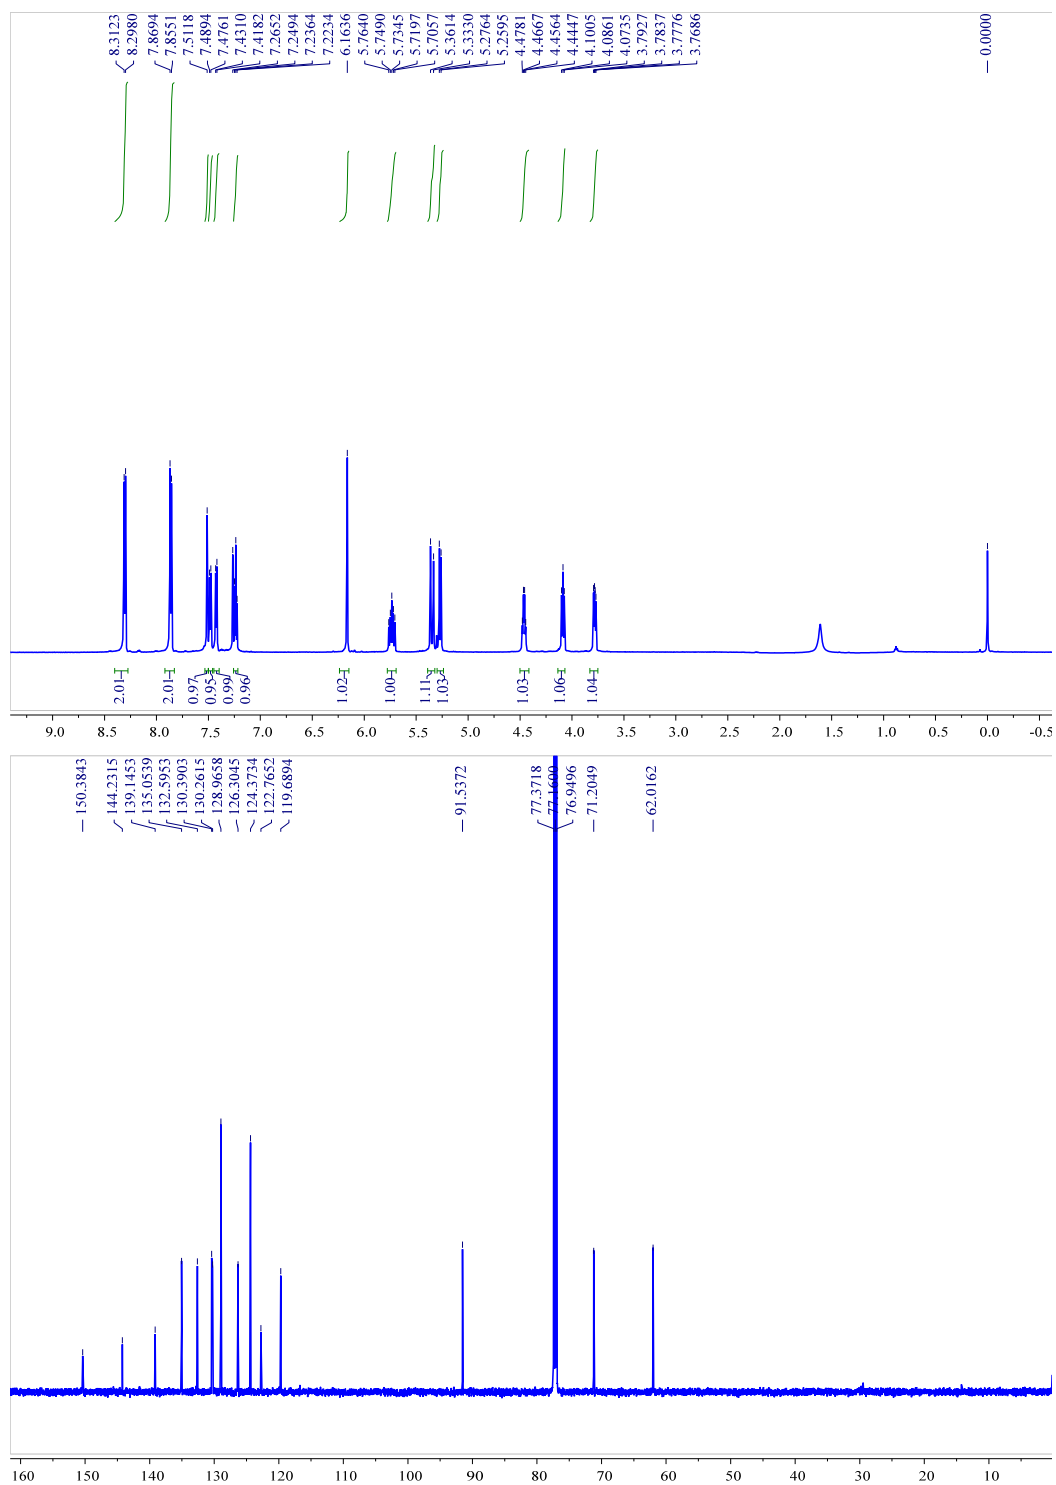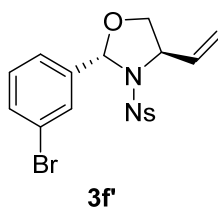

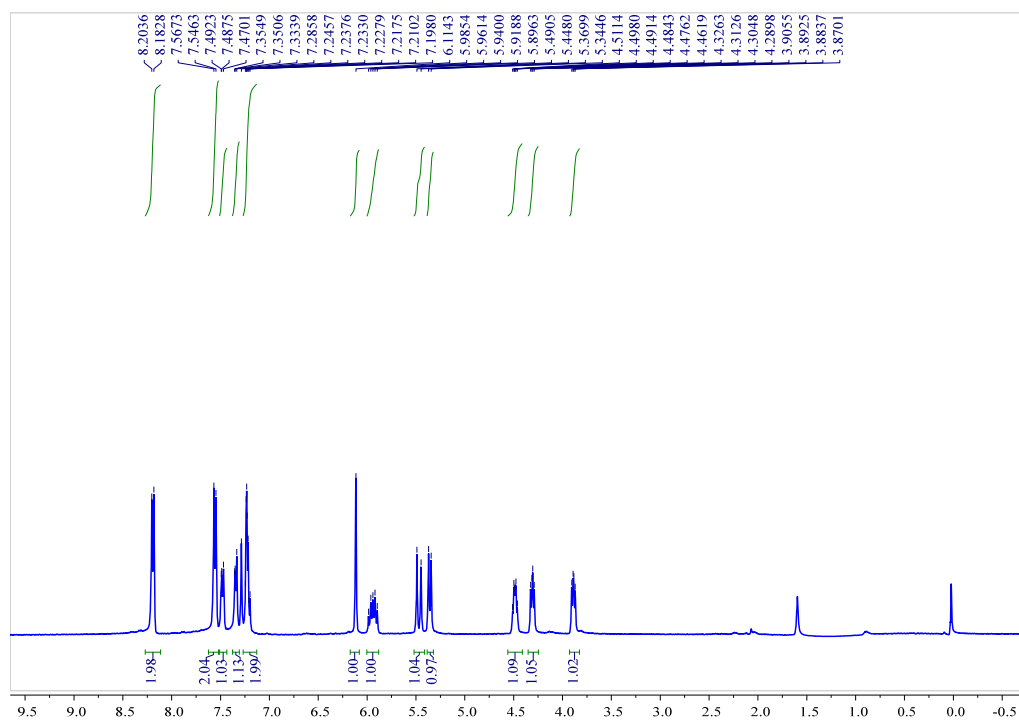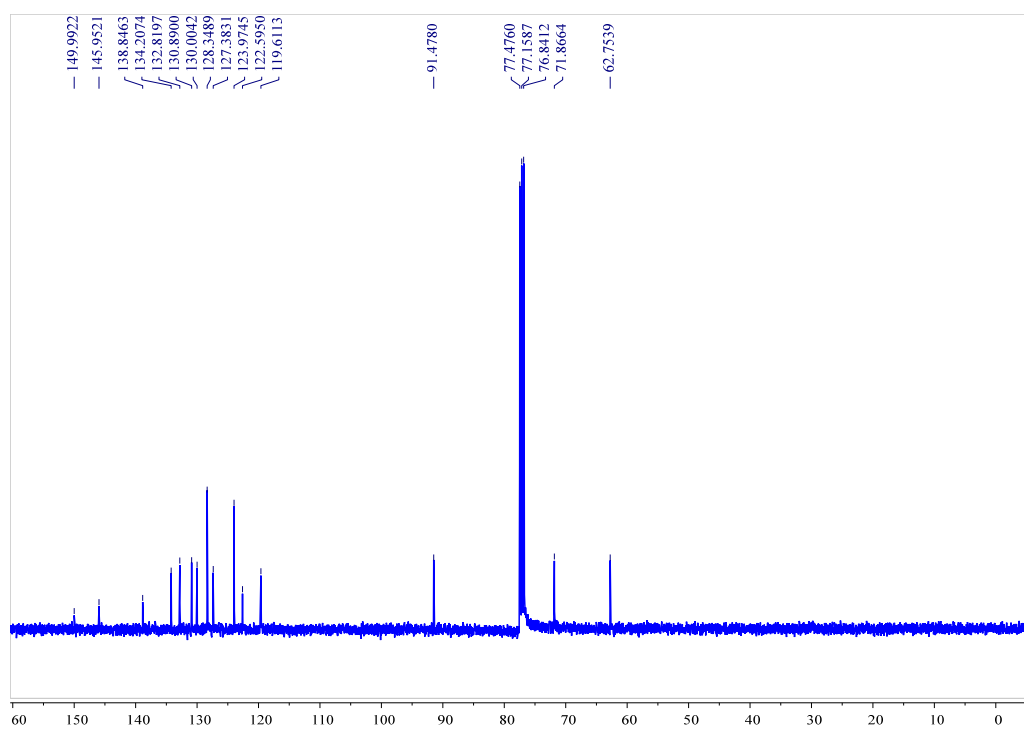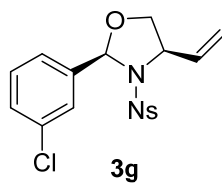



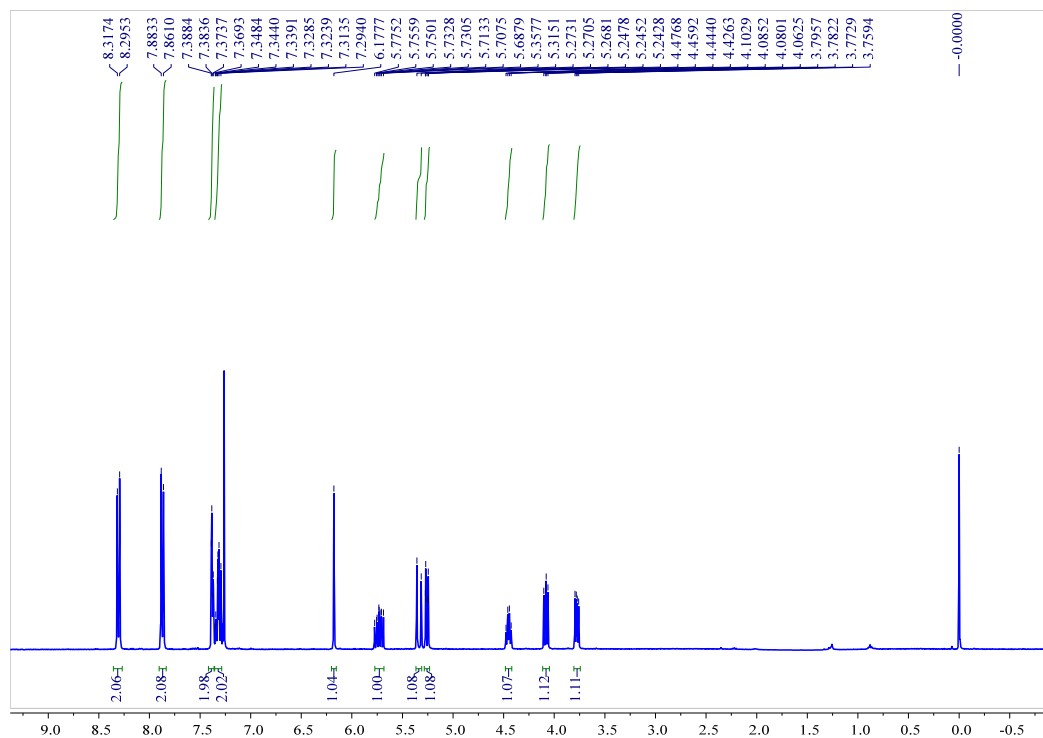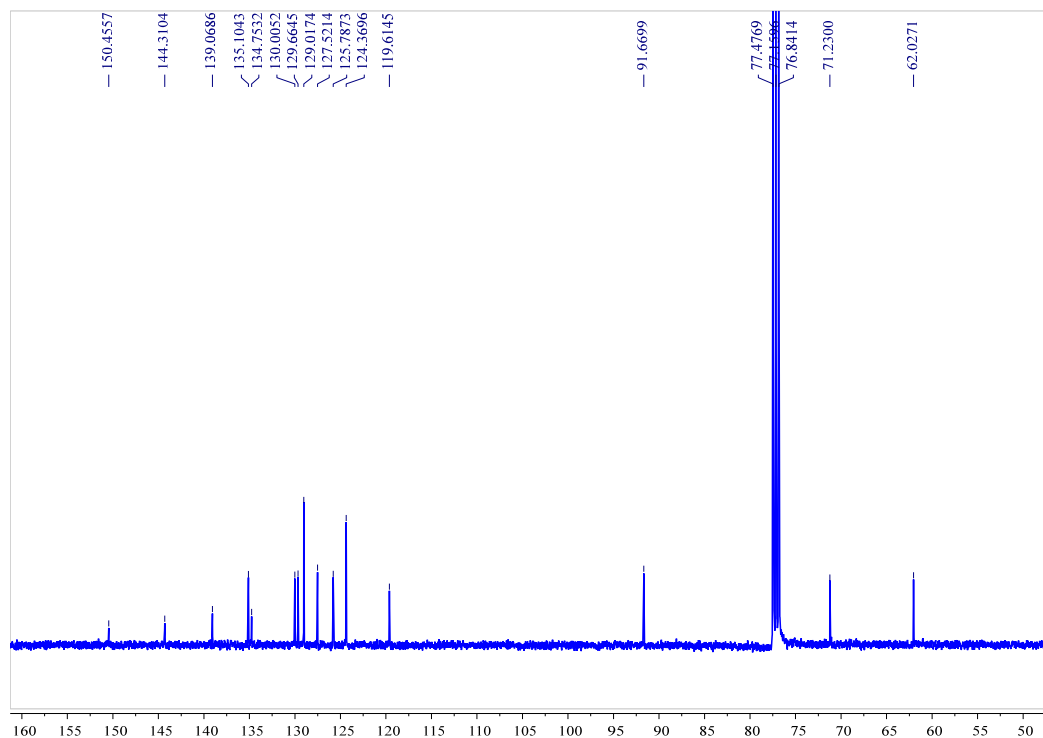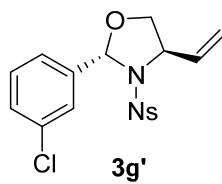

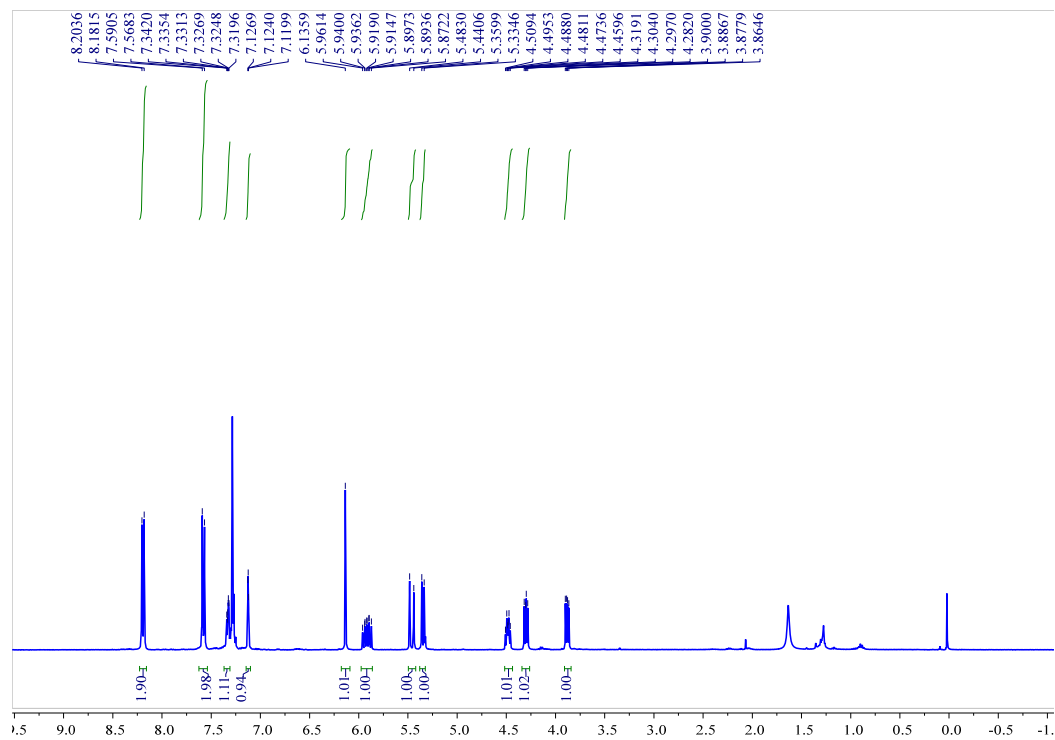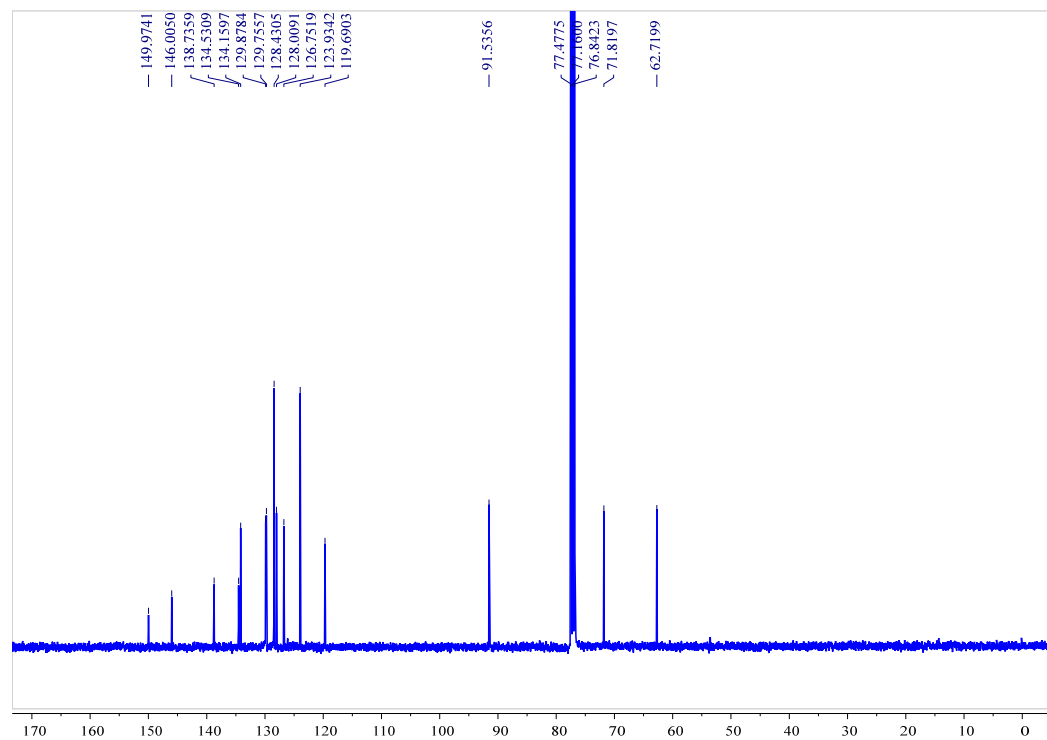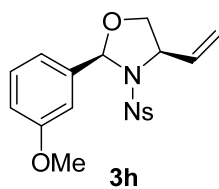

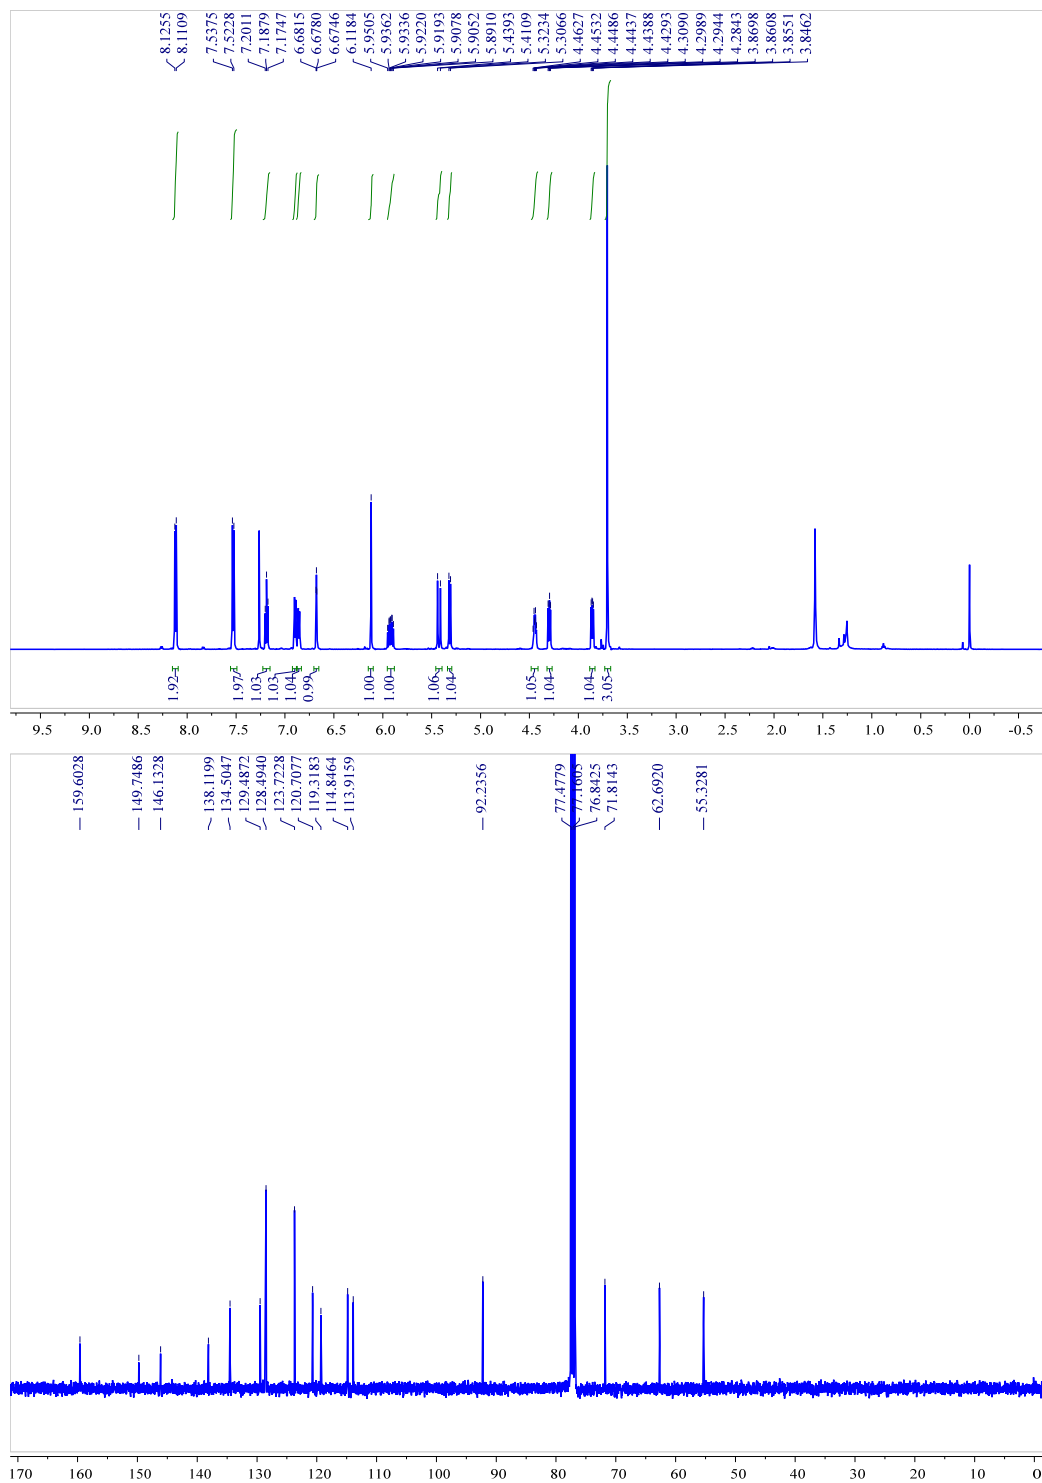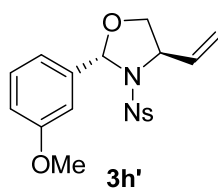

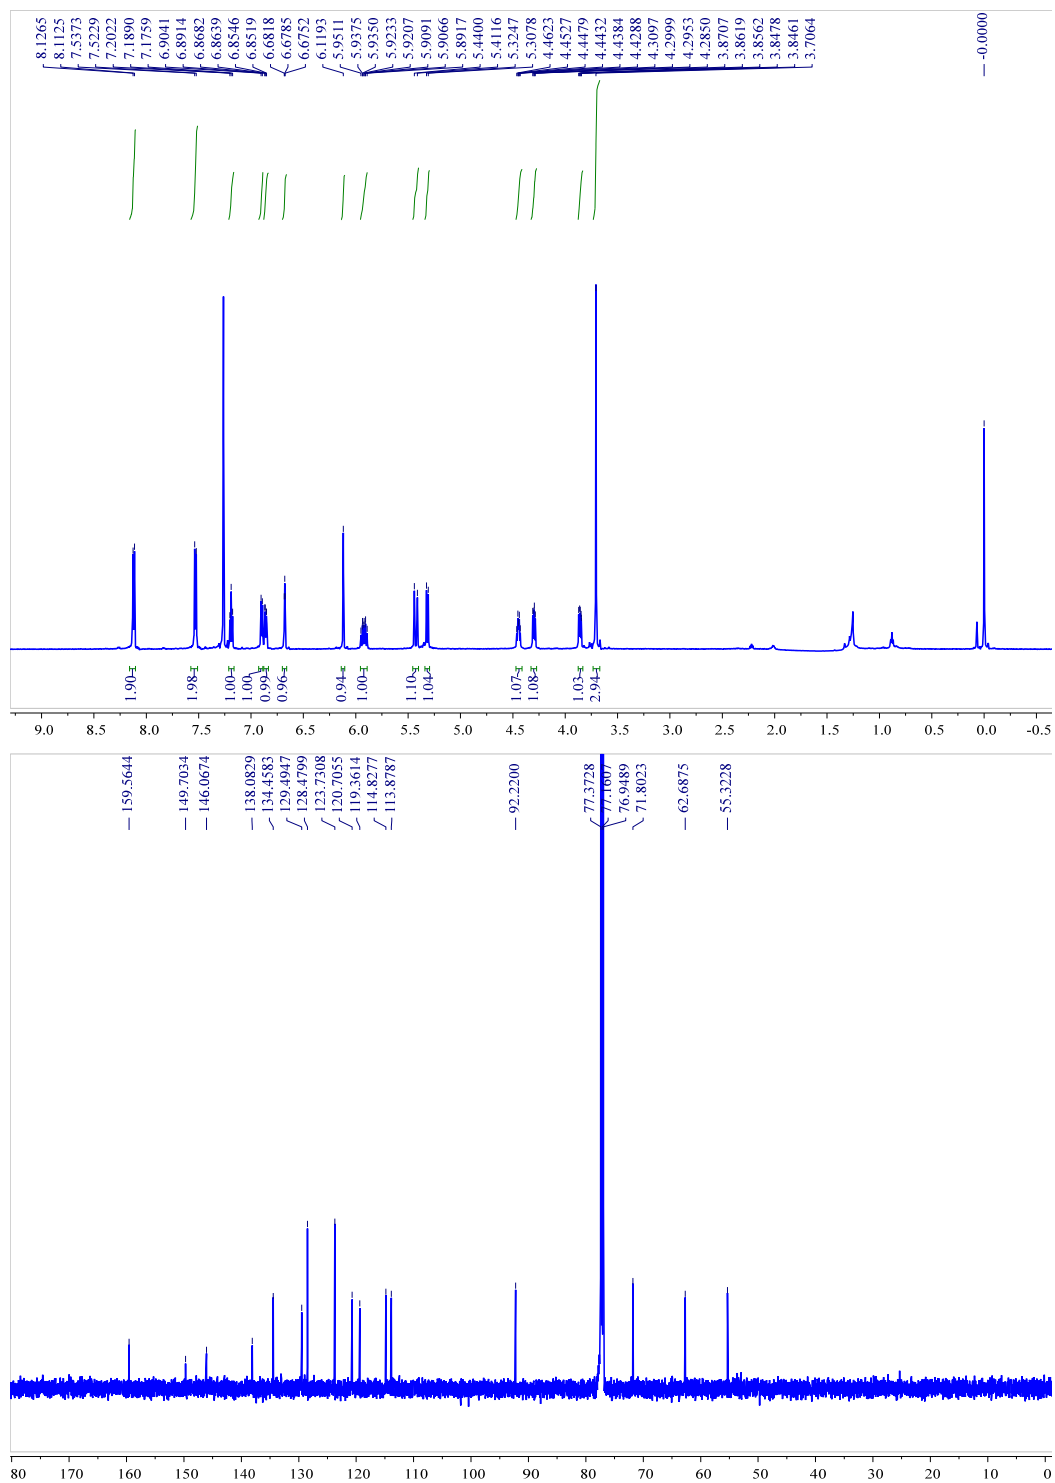

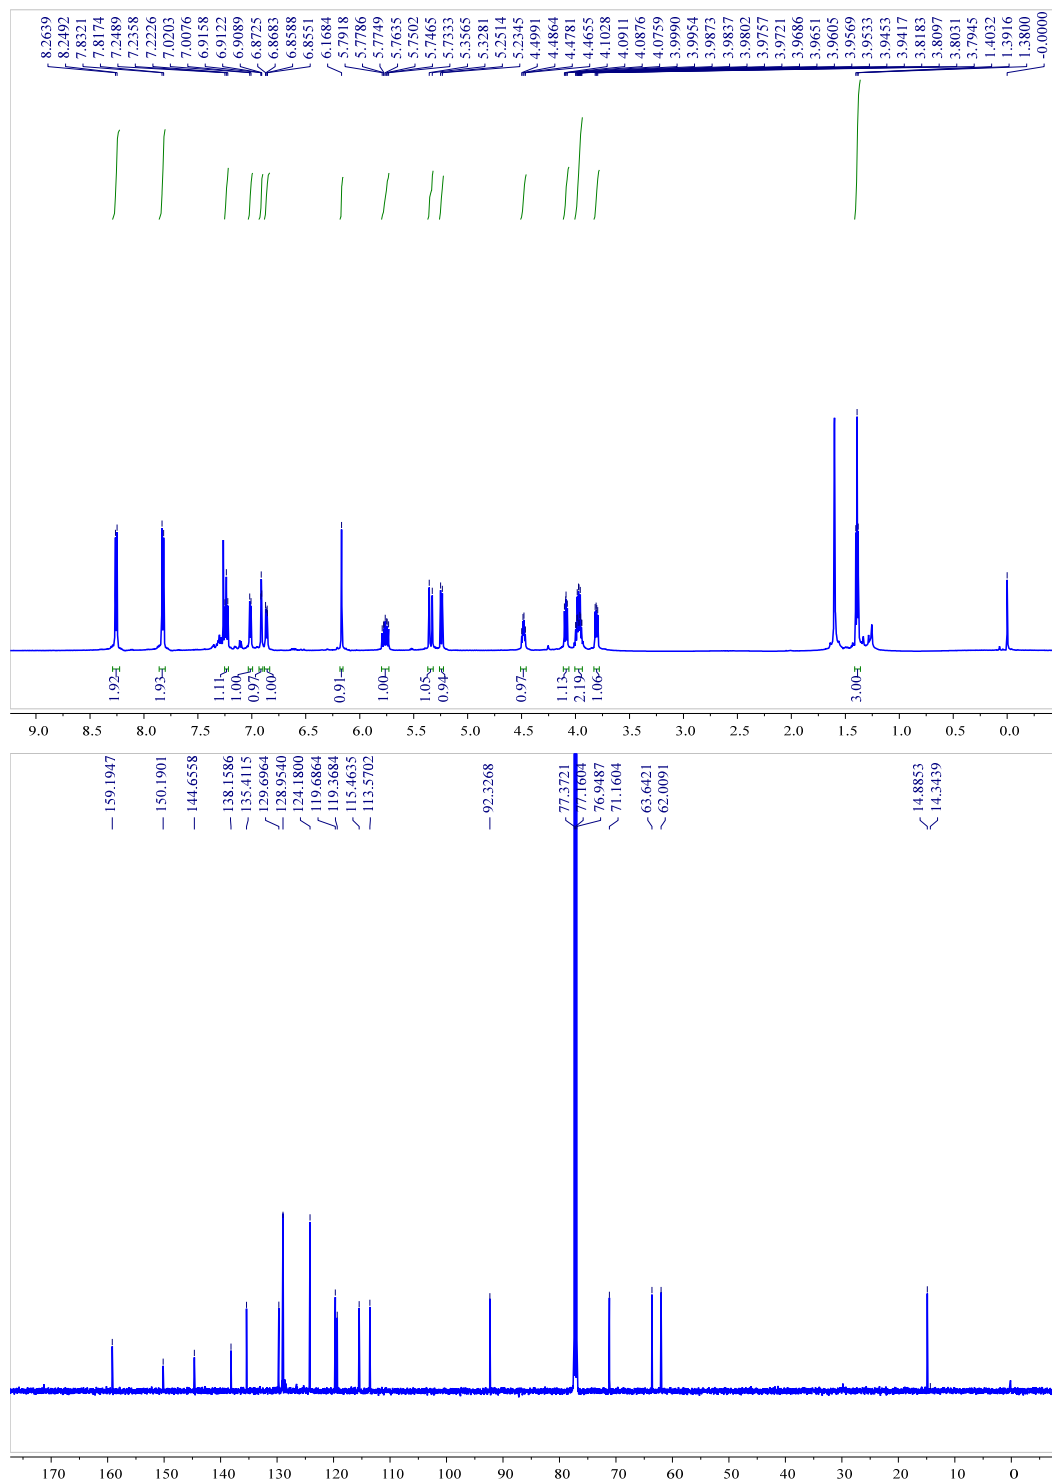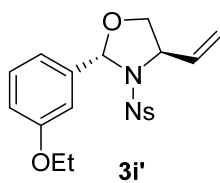

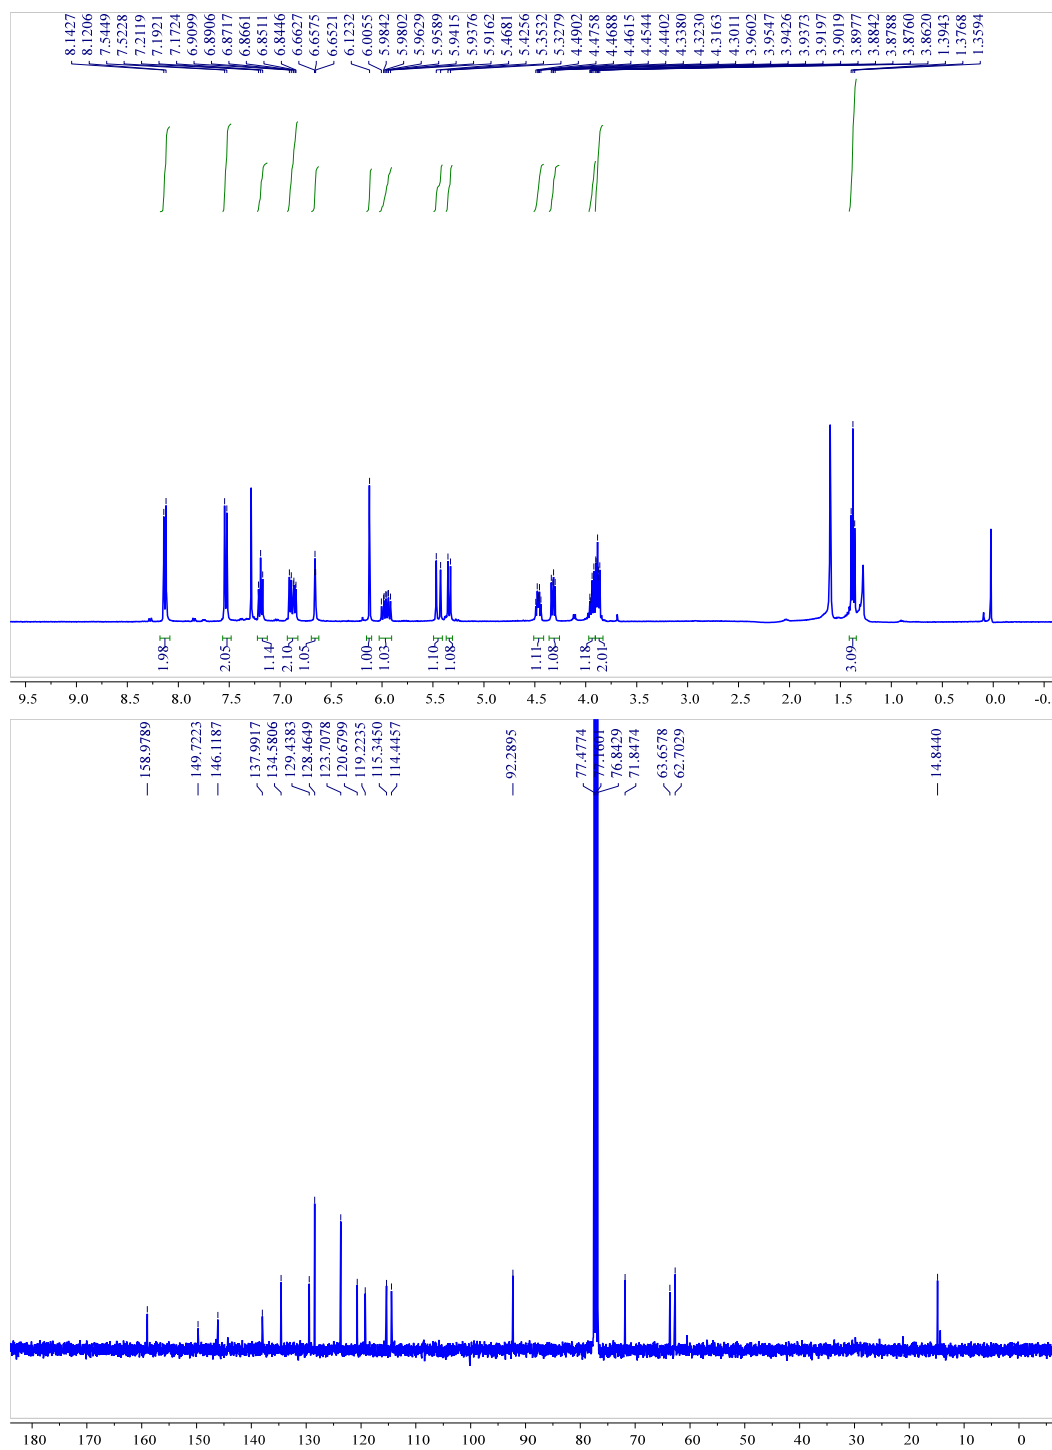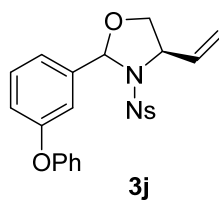

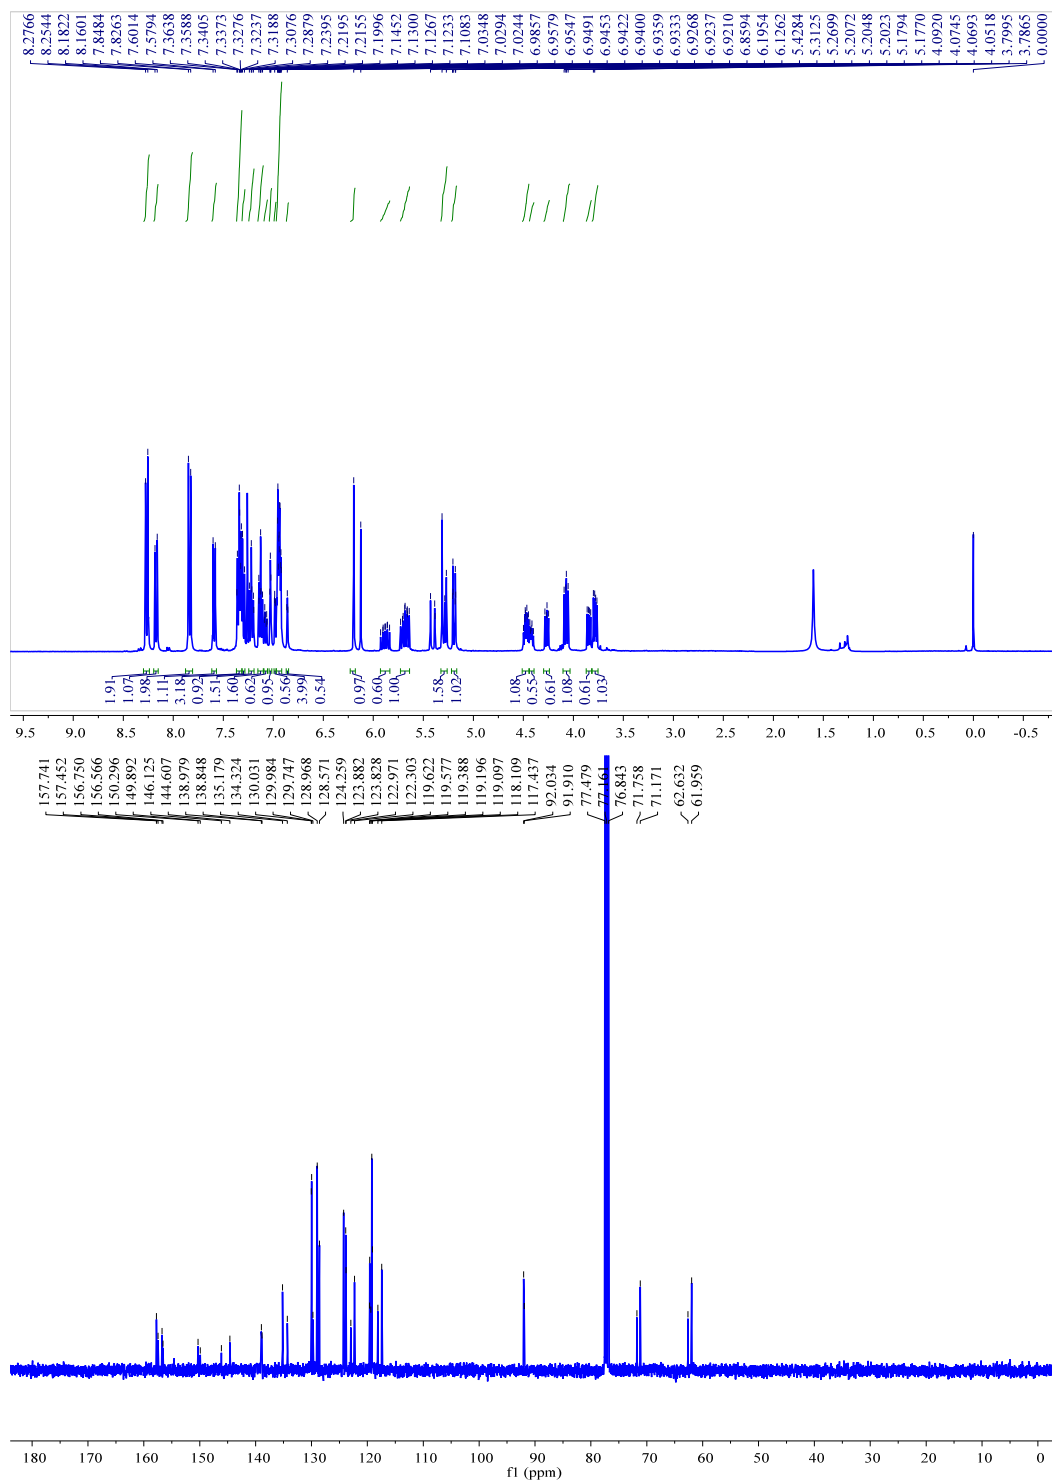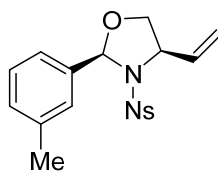

**3k**

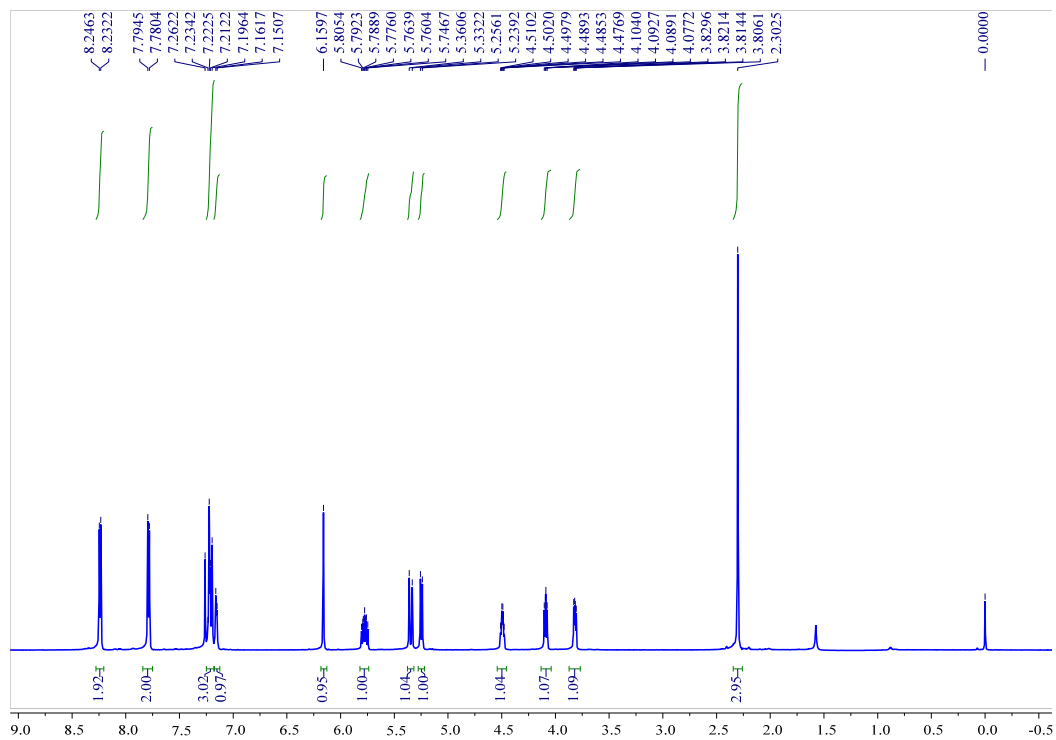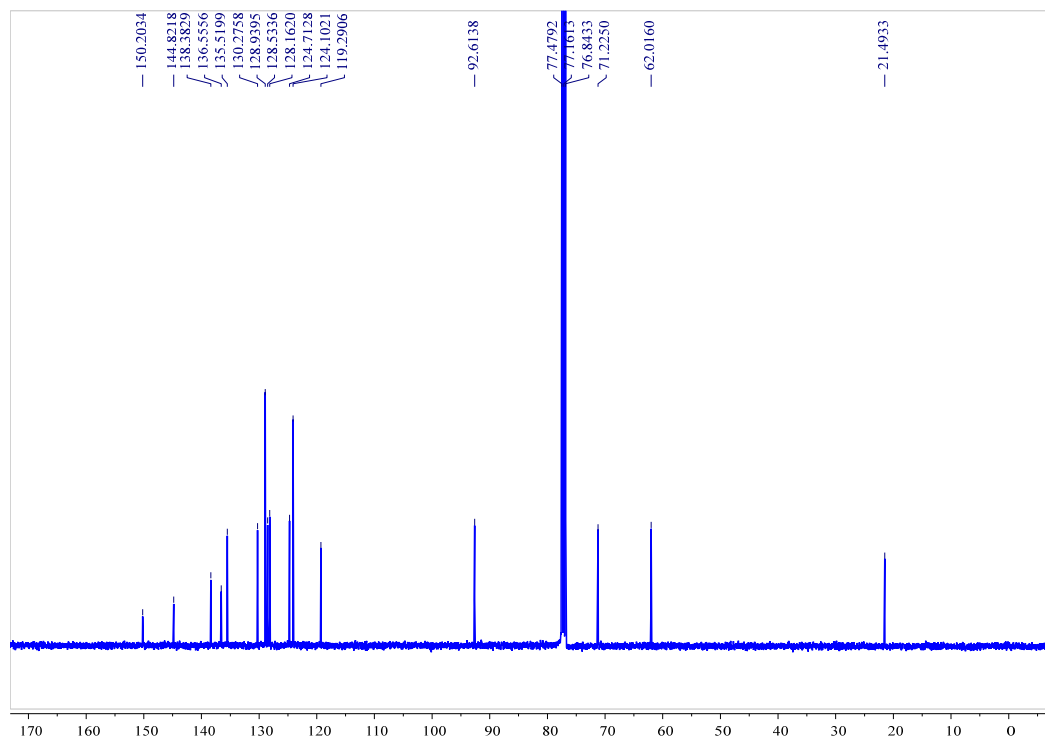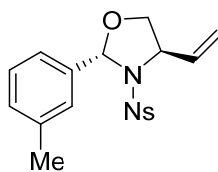

3k'



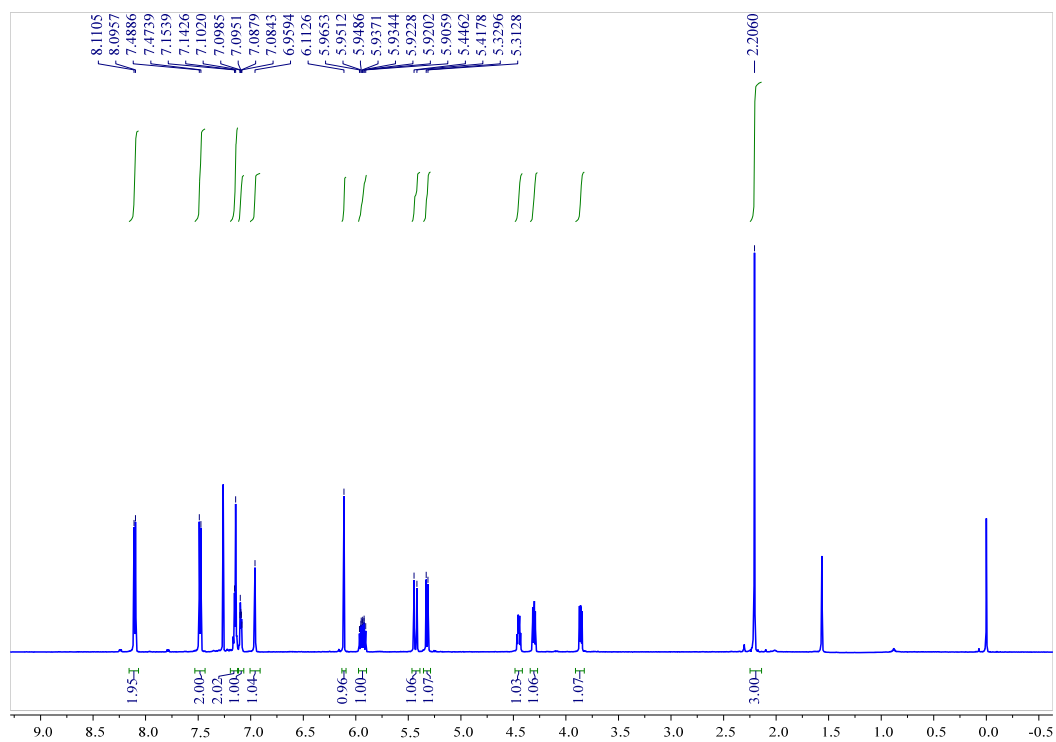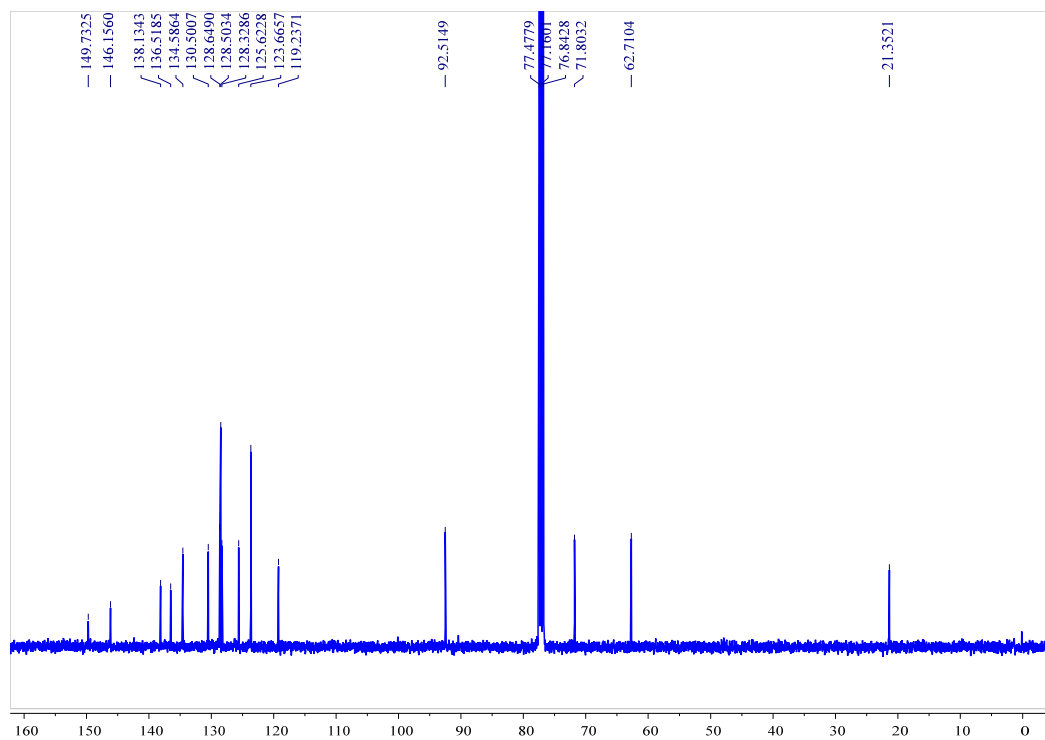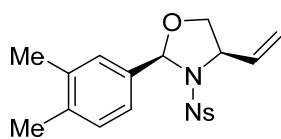

**31**

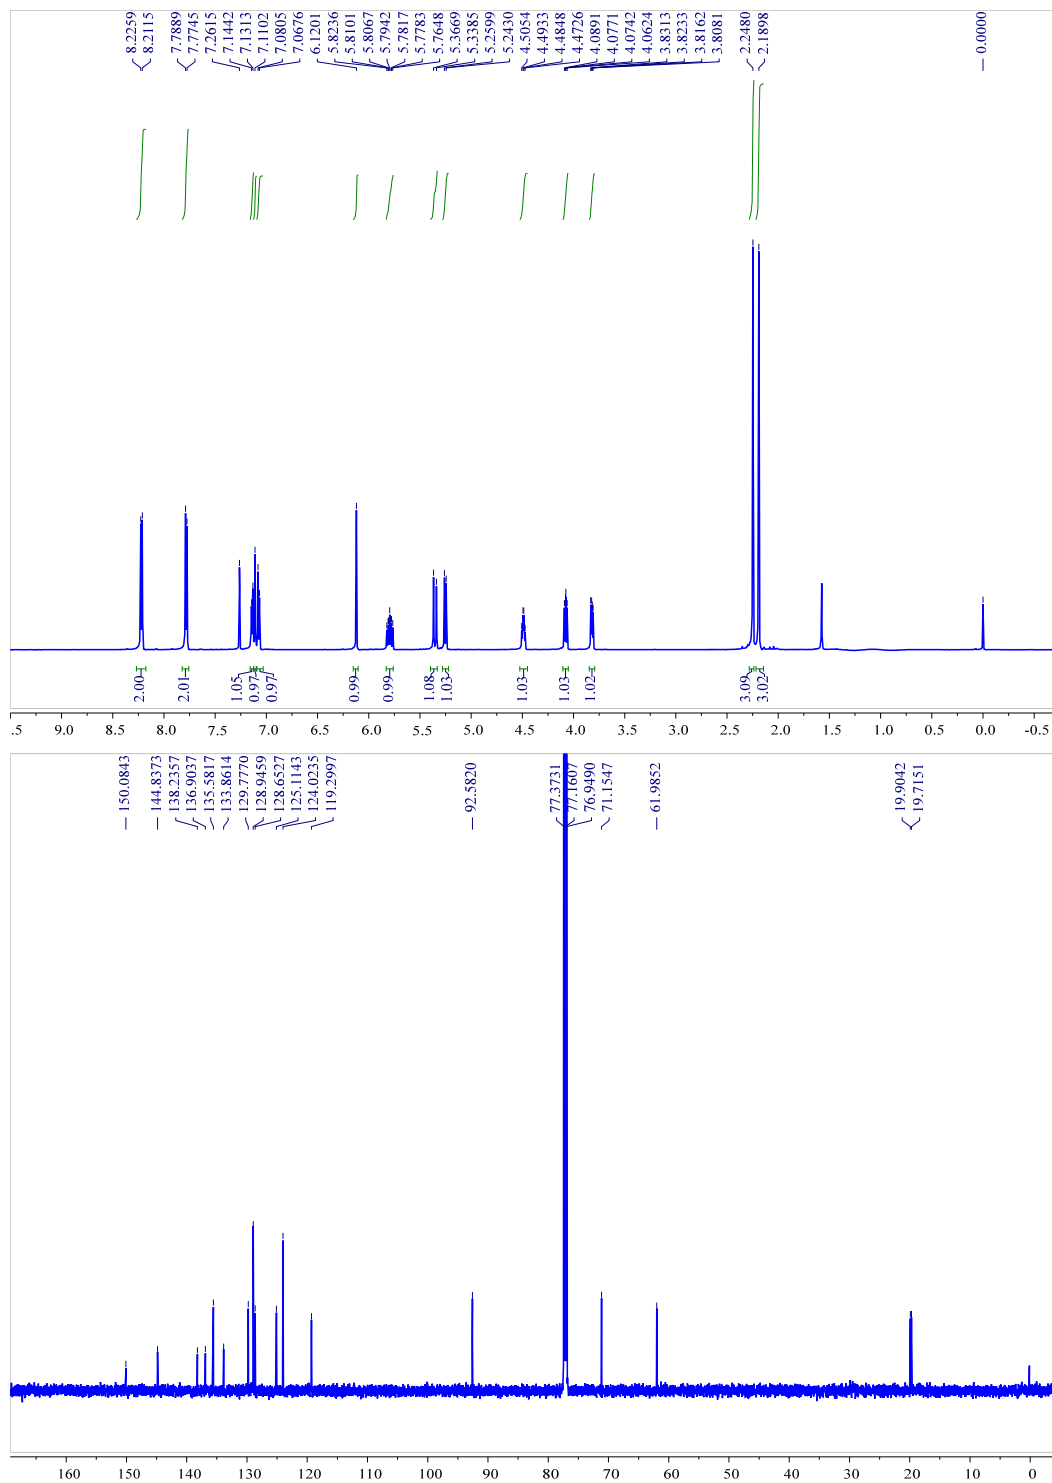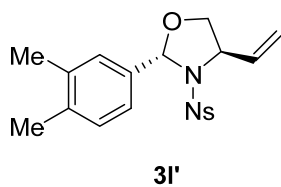

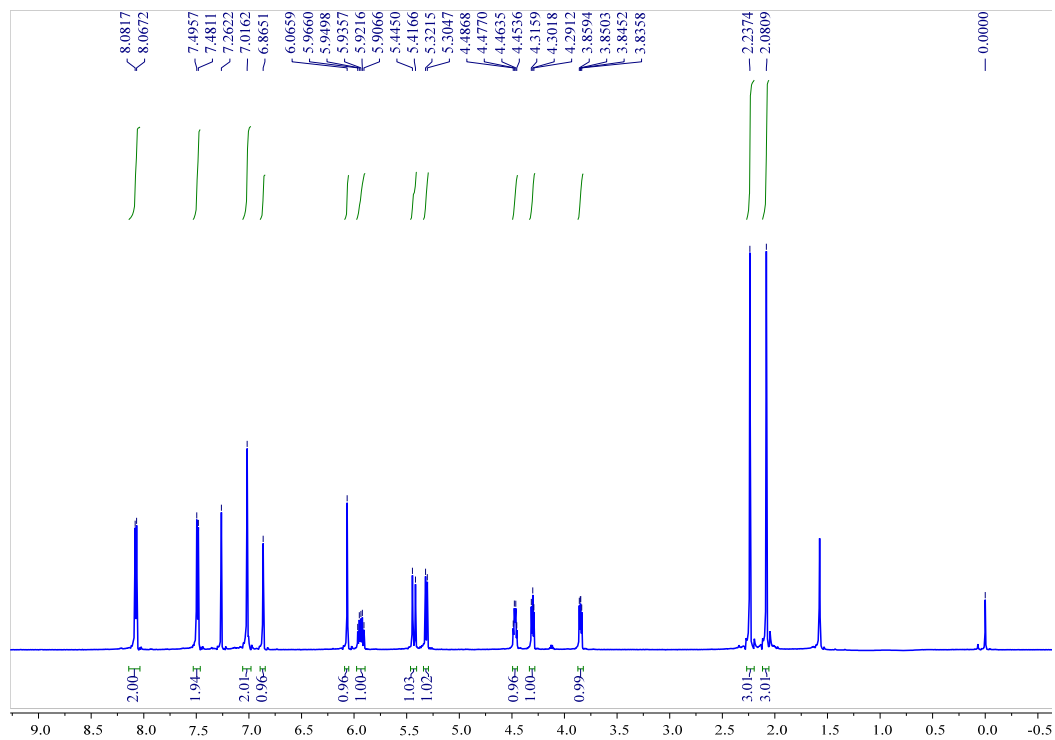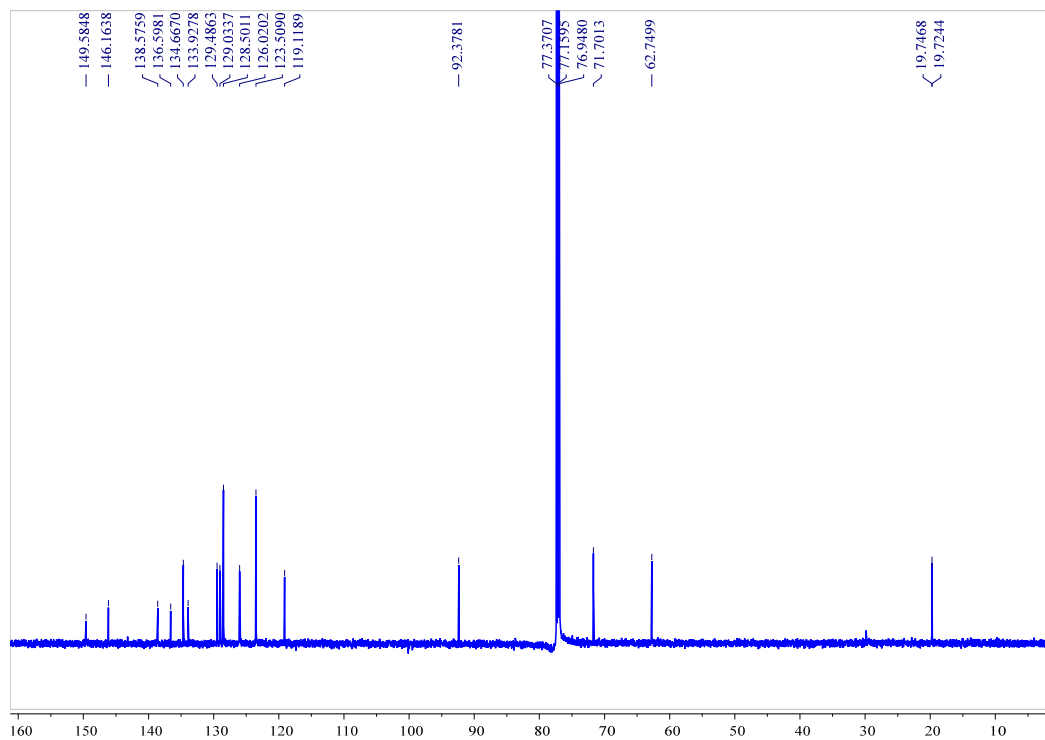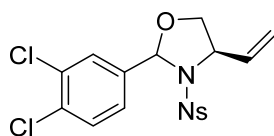

**3m**

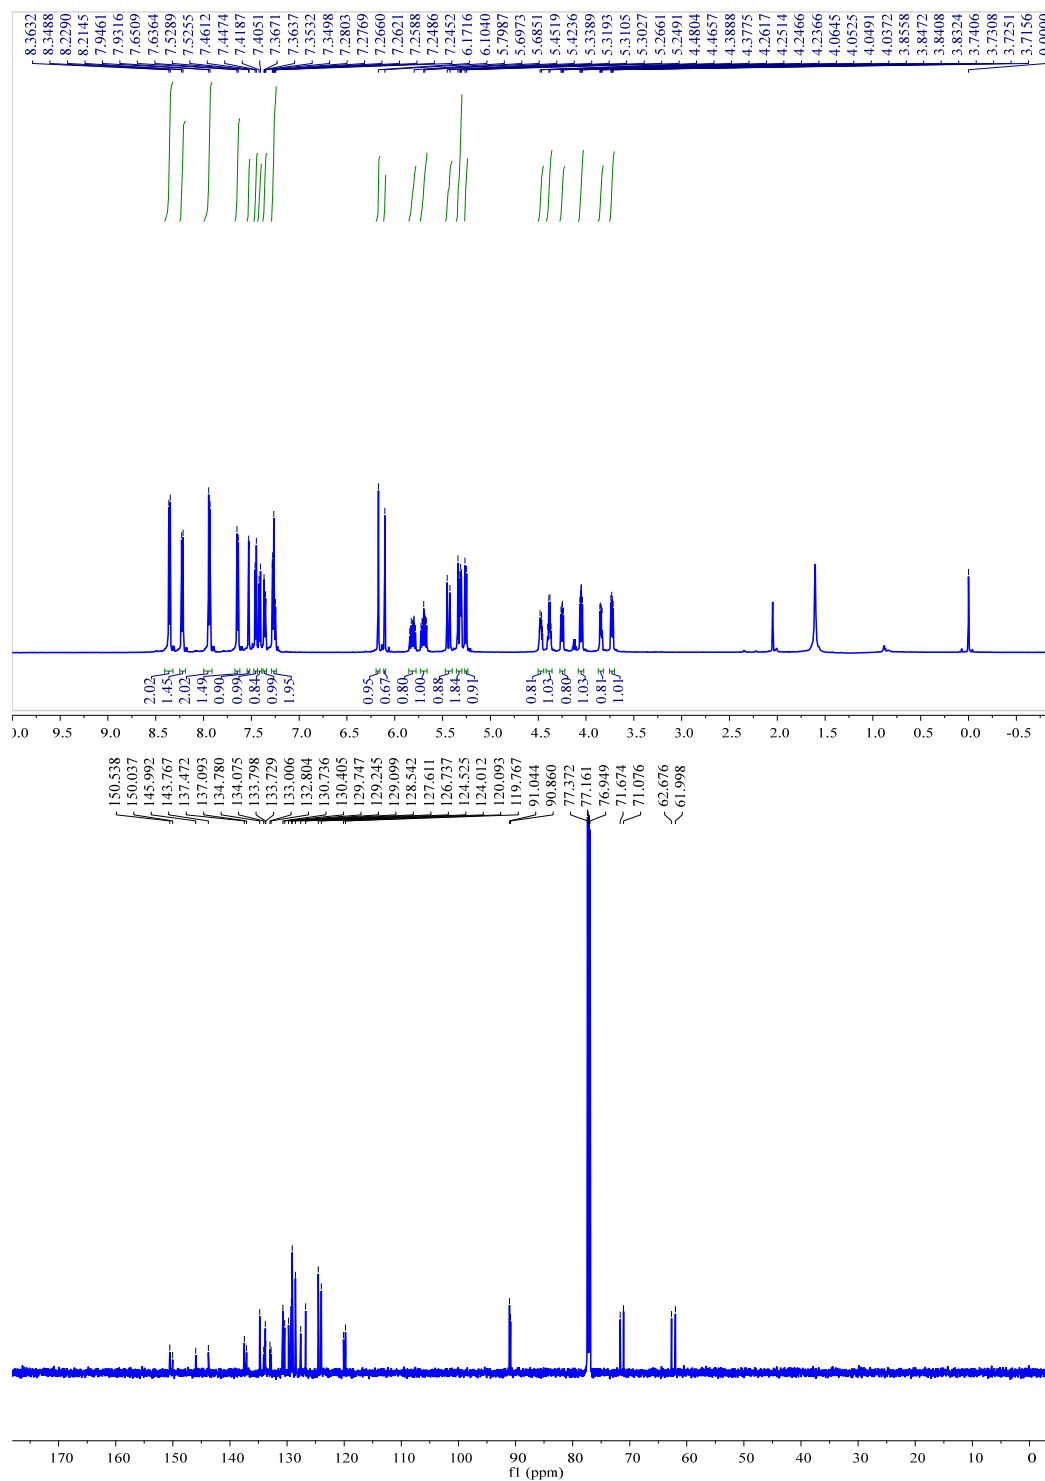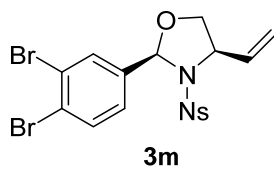

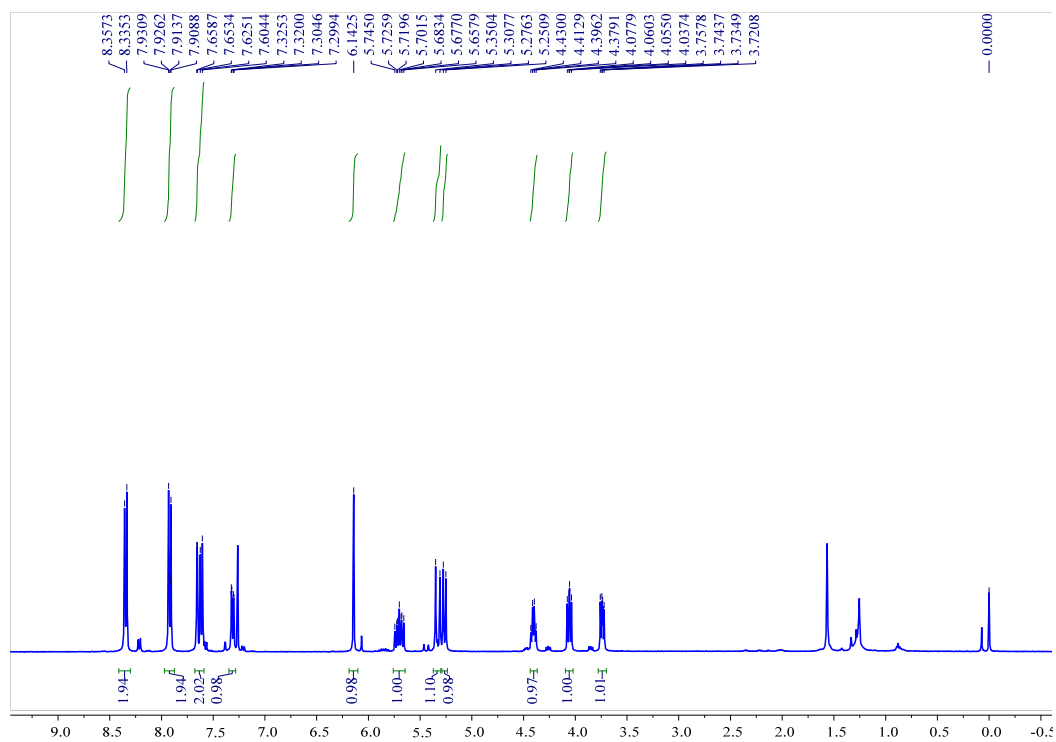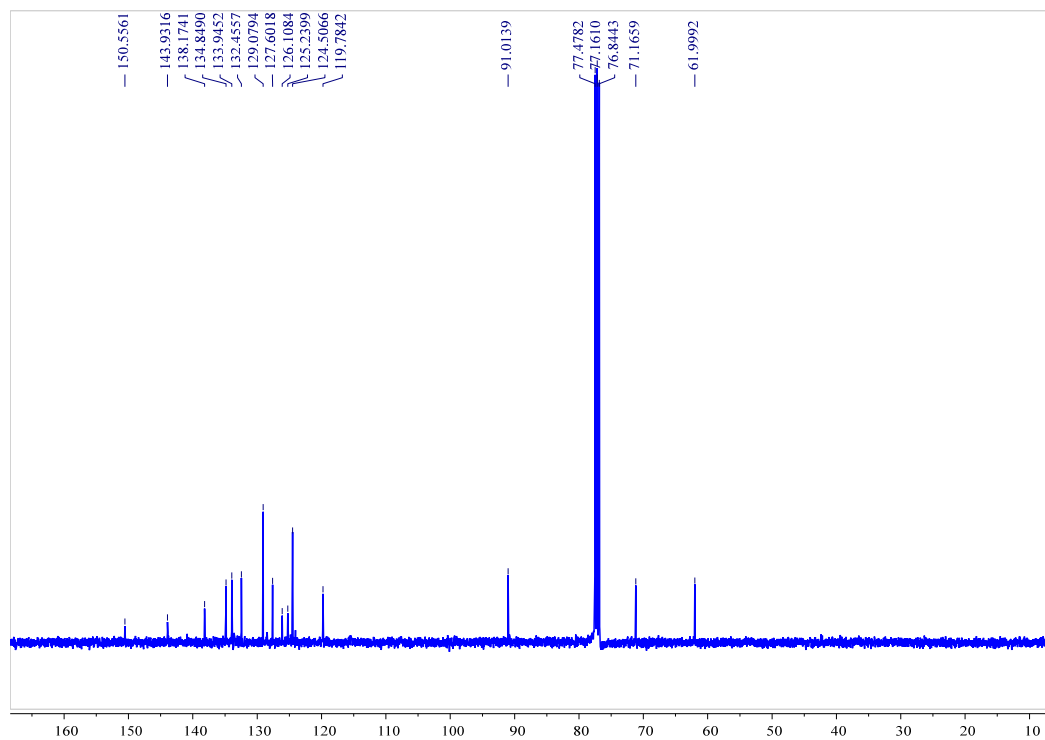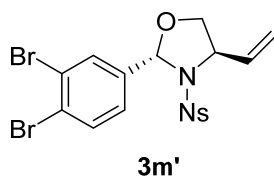

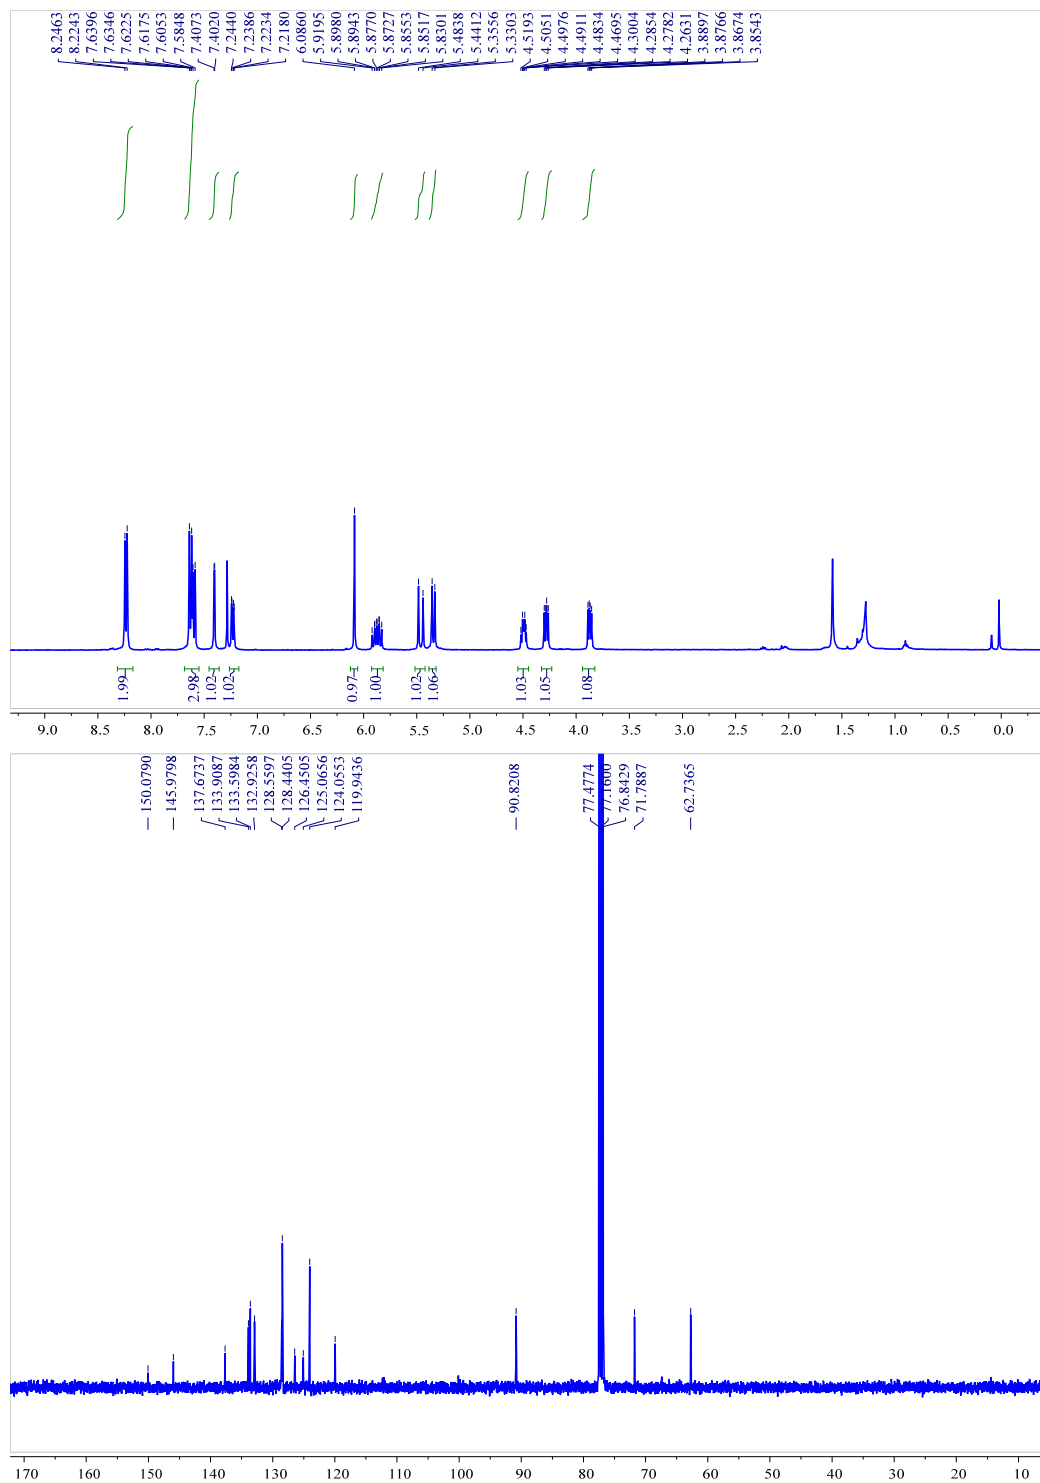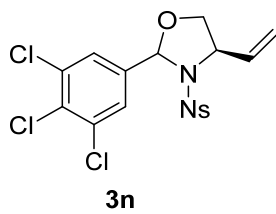

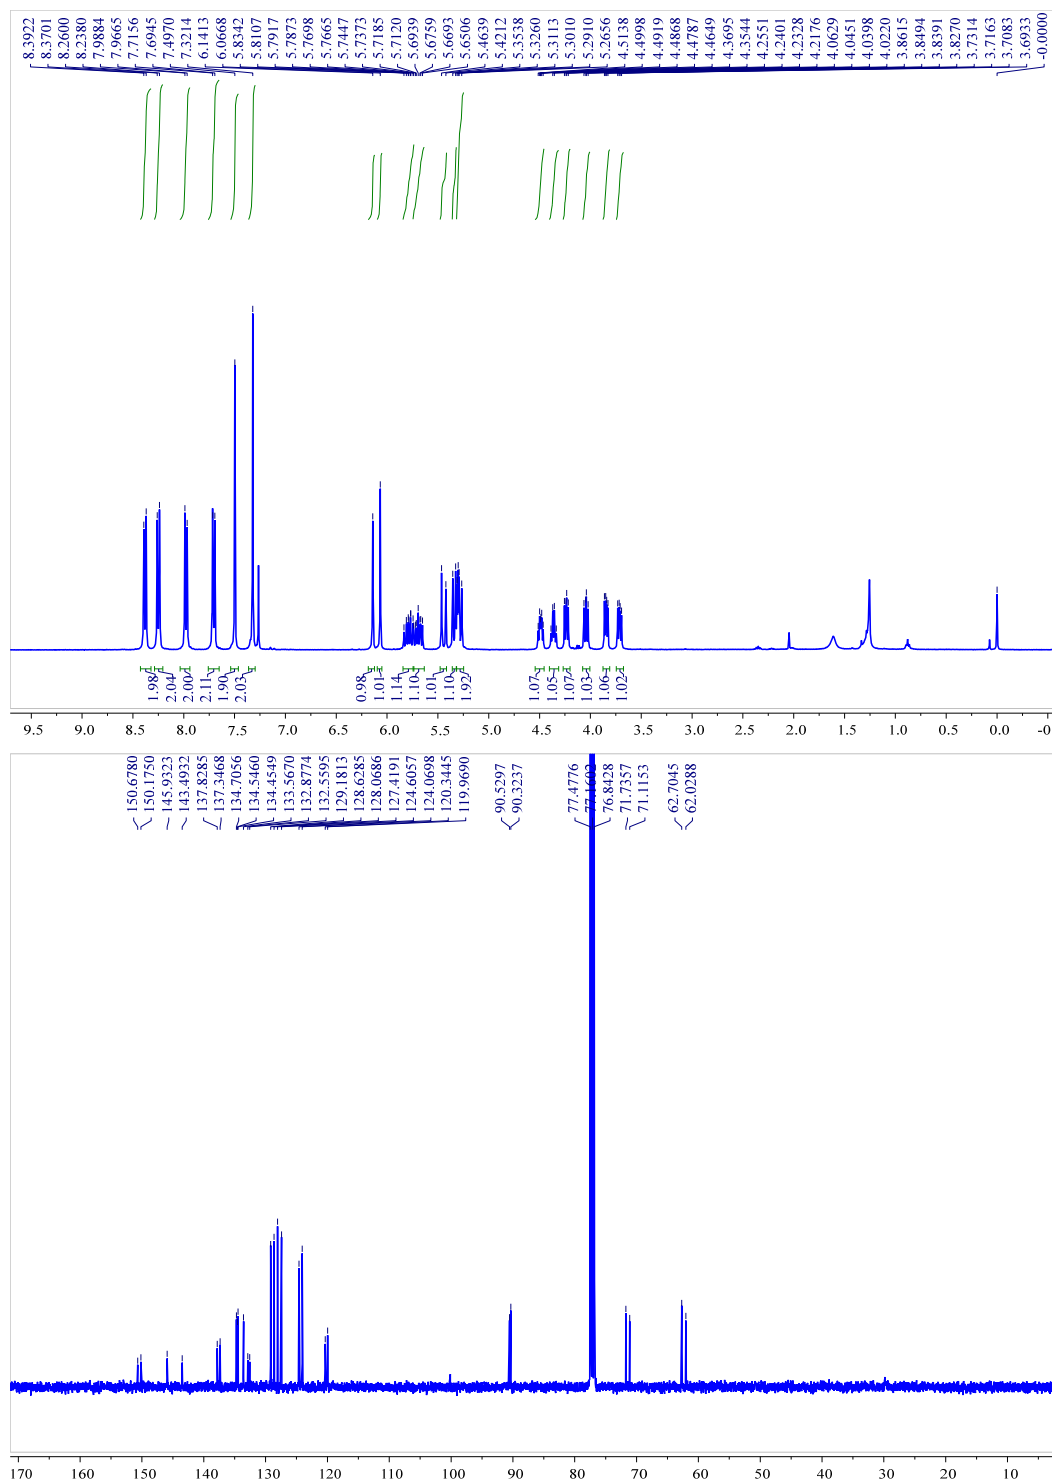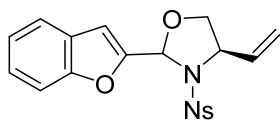

**3o**

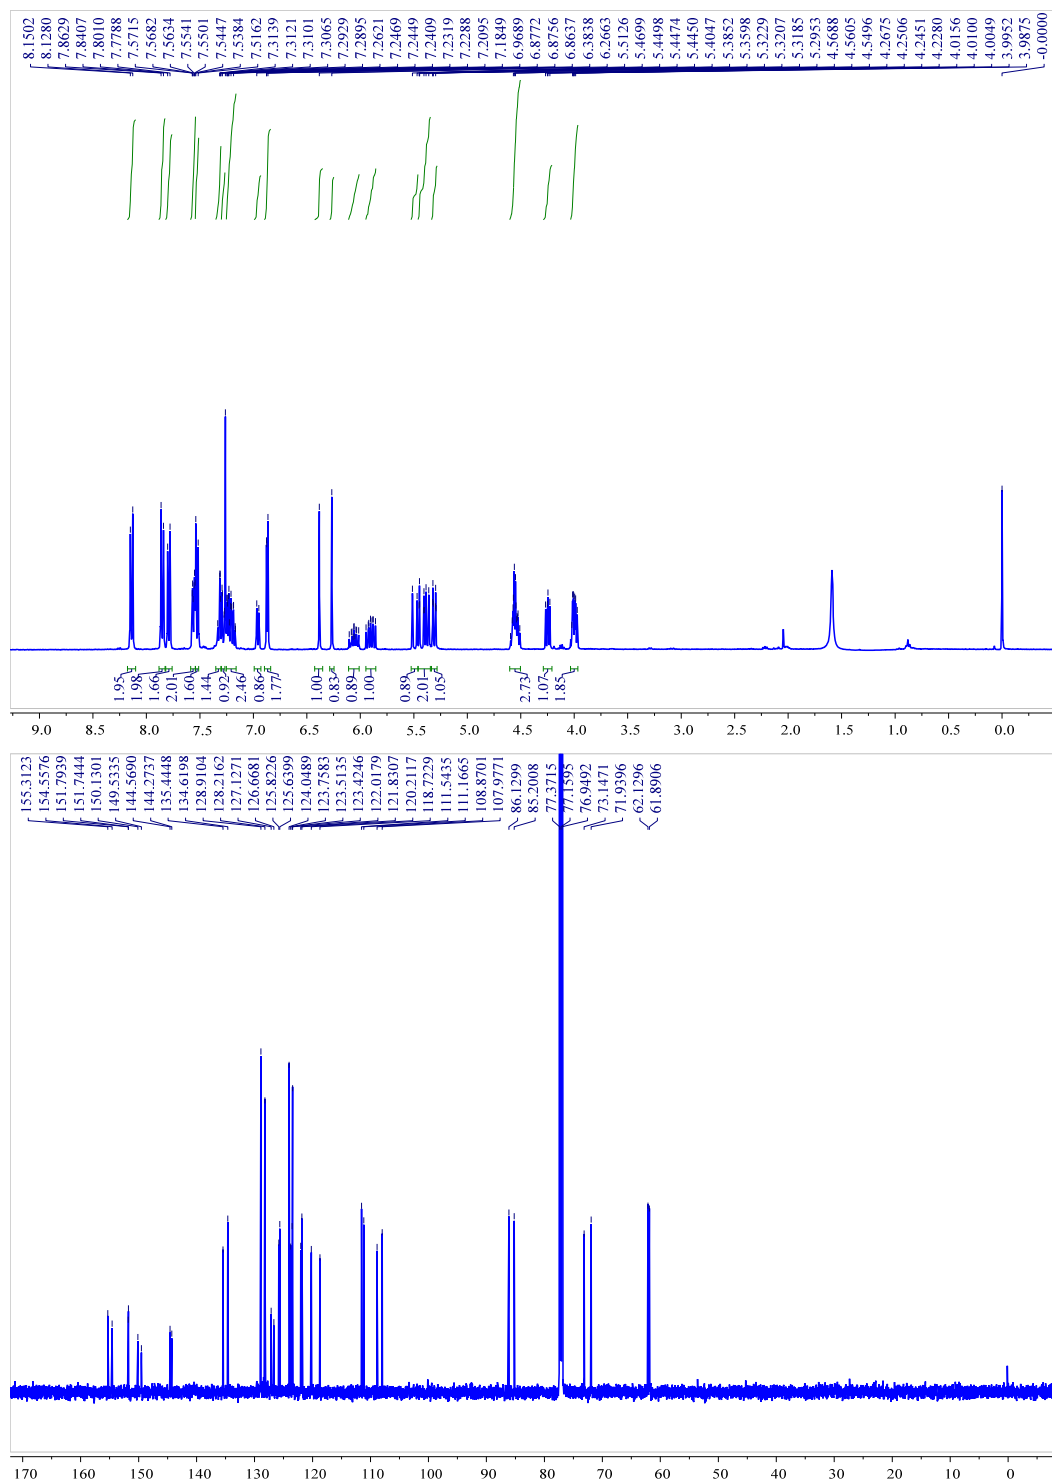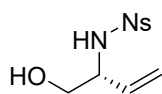

4



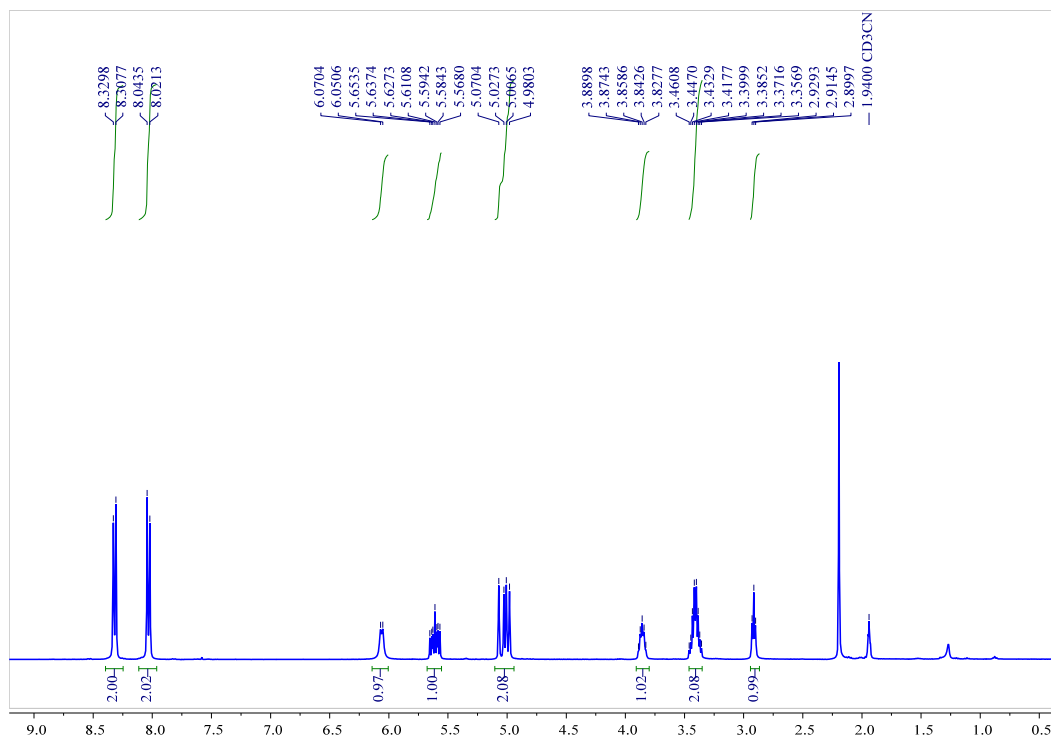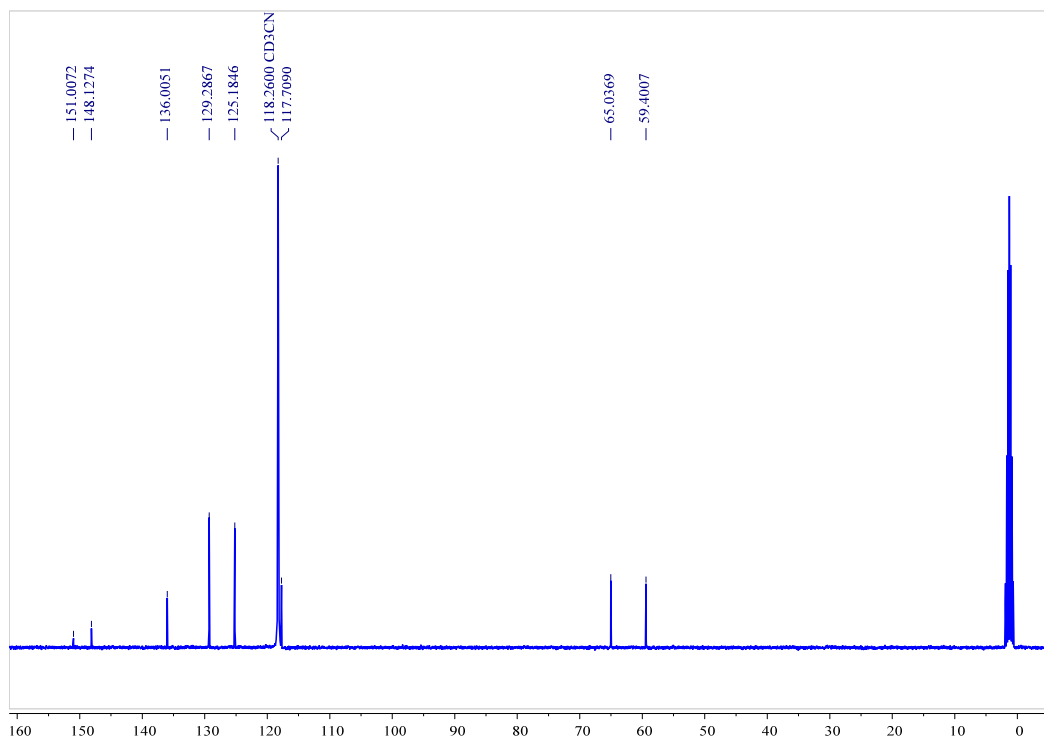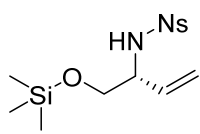

**5**

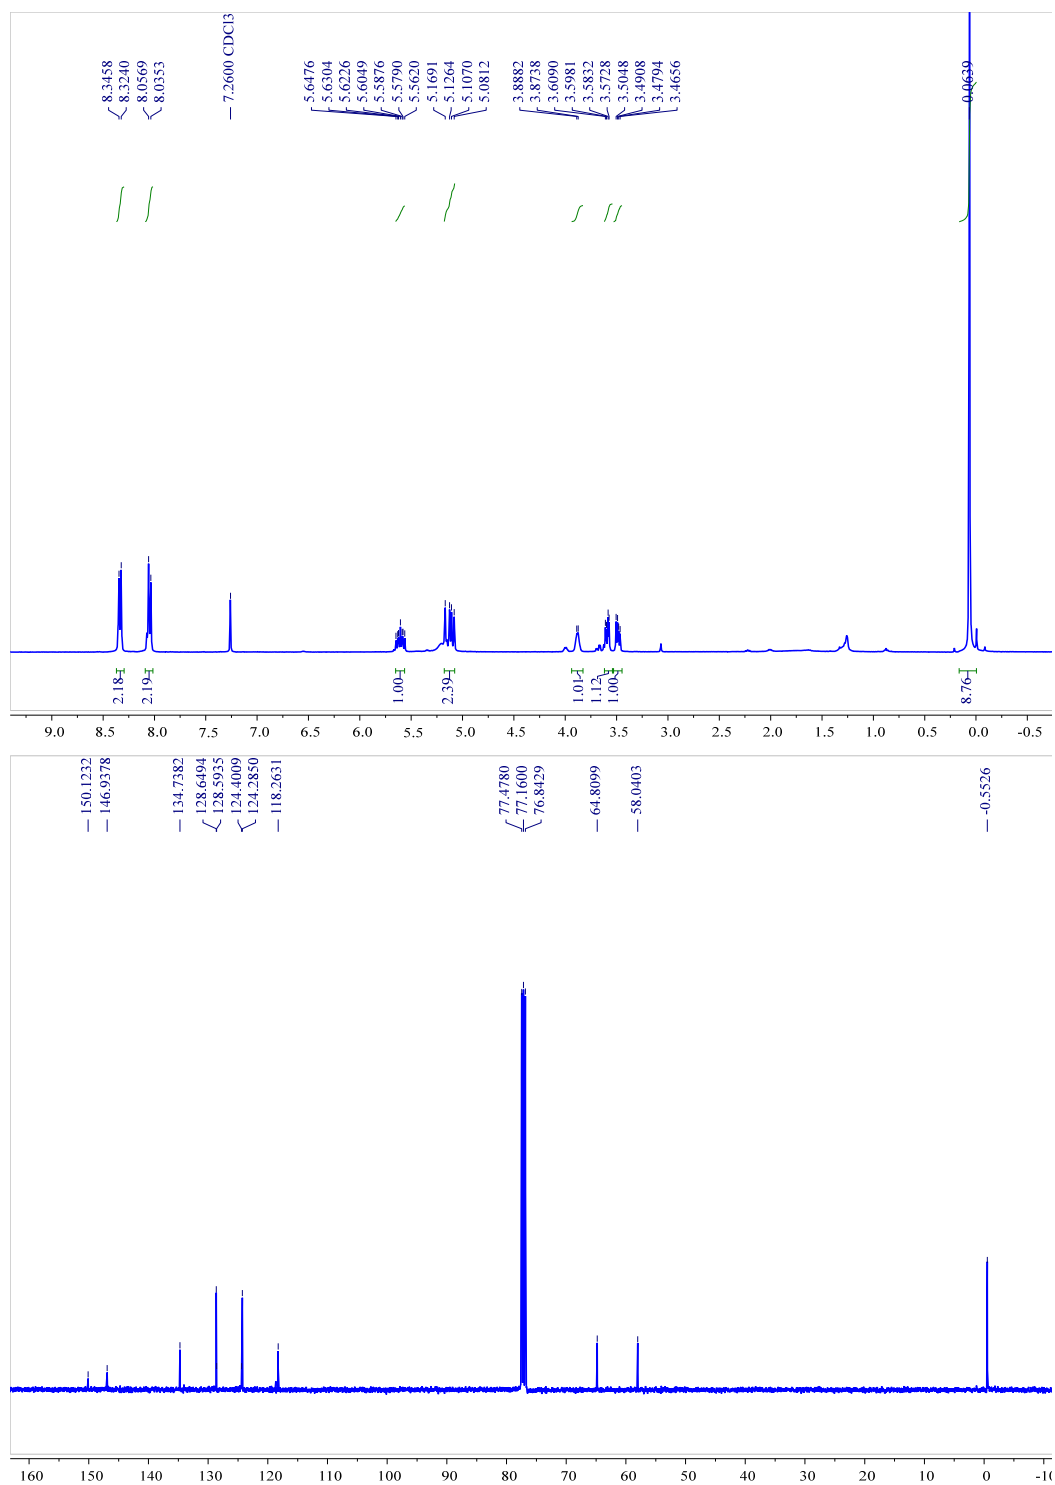

## 8. HPLC Spectra of compounds 3 / 3', 4 and 5

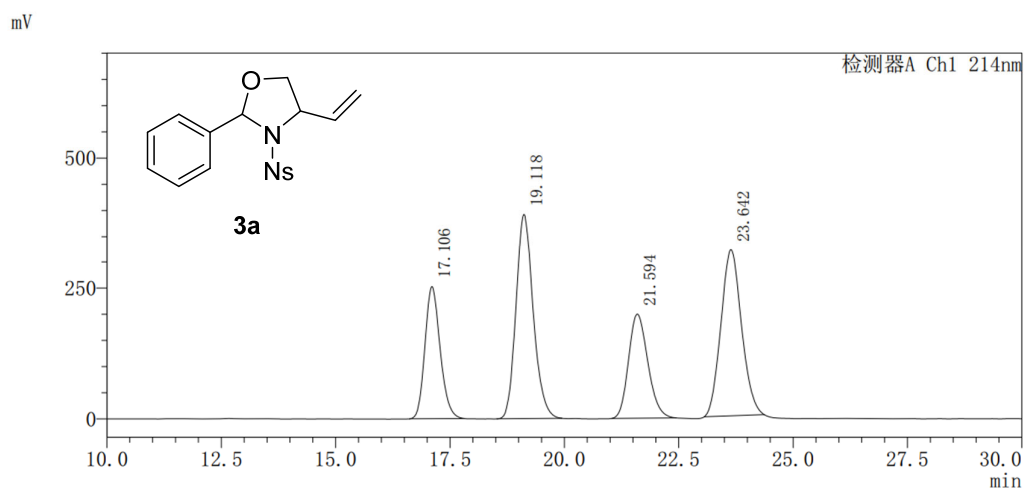

| Peak No.     | R. Time (min) | Peak Area (mV*min) | Percent (%) |
|--------------|---------------|--------------------|-------------|
| 1            | 17.106        | 5836701            | 18.343      |
| 2            | 19.118        | 10267306           | 32.267      |
| 3            | 21.594        | 5807382            | 18.251      |
| 4            | 23.642        | 9908455            | 31.139      |
| <b>Total</b> |               | 31819844           | 100.000     |

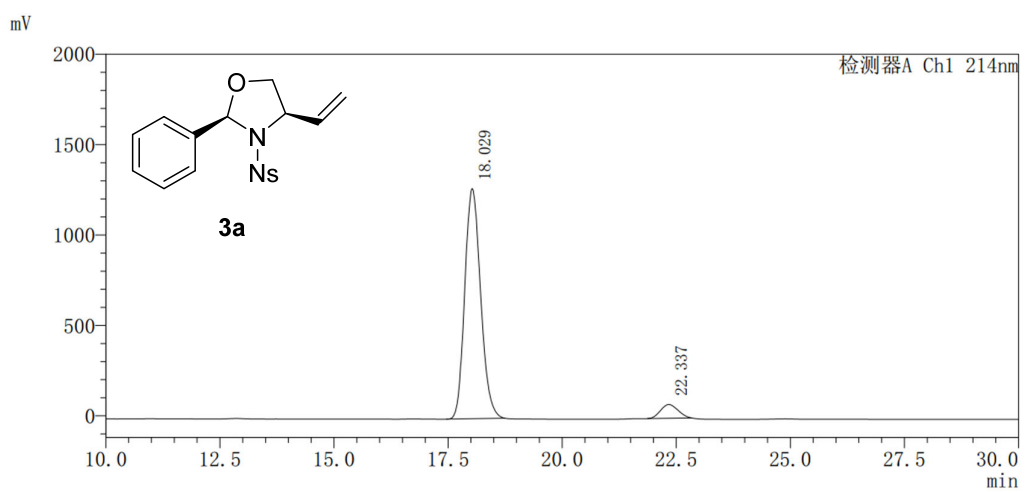

| Peak No.     | R. Time (min) | Peak Area (mV*min) | Percent (%) |
|--------------|---------------|--------------------|-------------|
| 1            | 18.029        | 30932429           | 93.854      |
| 2            | 22.337        | 2025483            | 6.146       |
| <b>Total</b> |               | 32957912           | 100.000     |

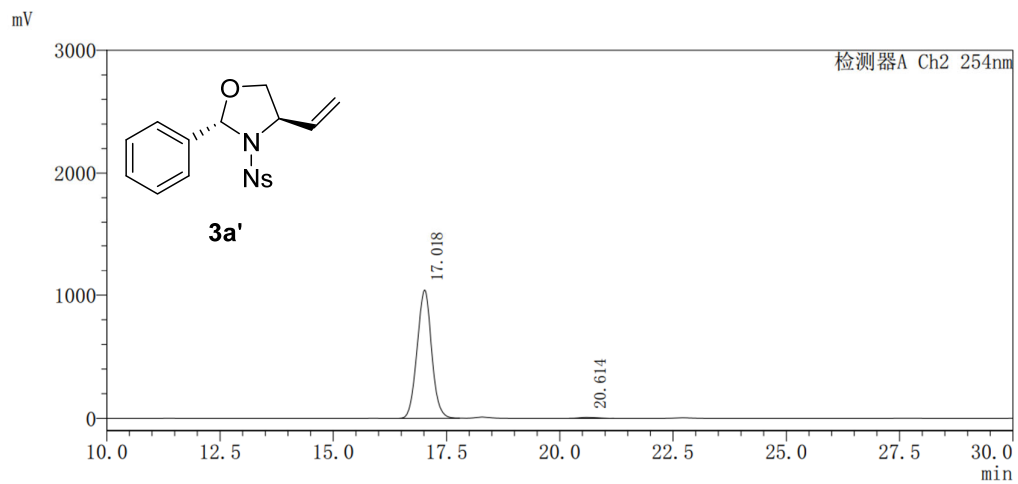

| Peak No.     | R. Time (min) | Peak Area (mV*min) | Percent (%) |
|--------------|---------------|--------------------|-------------|
| 1            | 17.016        | 42570141           | 99.232      |
| 2            | 20.610        | 329296             | 0.768       |
| <b>Total</b> |               | 42899437           | 100.000     |

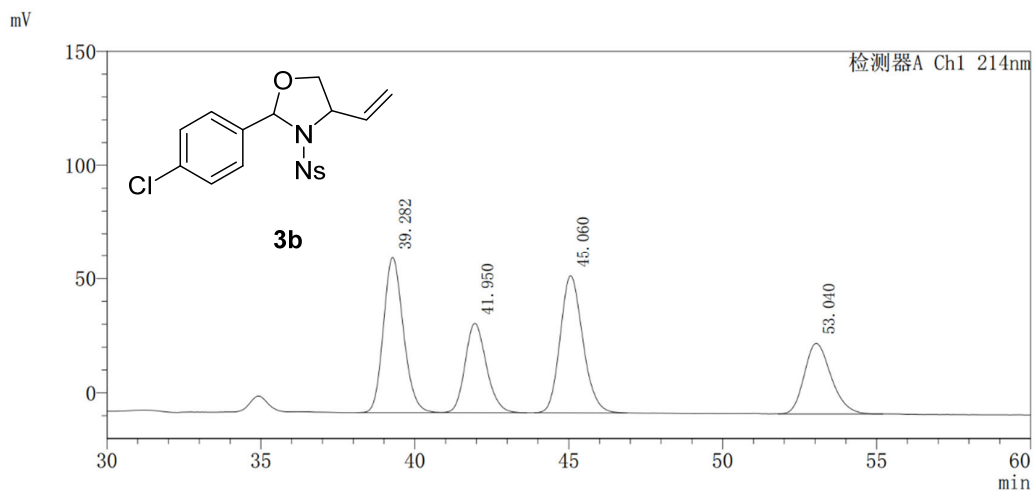

| Peak No.     | R. Time (min) | Peak Area (mV*min) | Percent (%) |
|--------------|---------------|--------------------|-------------|
| 1            | 39.282        | 3056421            | 30.884      |
| 2            | 41.950        | 1881503            | 19.012      |
| 3            | 45.060        | 3075031            | 31.072      |
| 4            | 53.040        | 1883632            | 19.033      |
| <b>Total</b> |               | 9896586            | 100.000     |

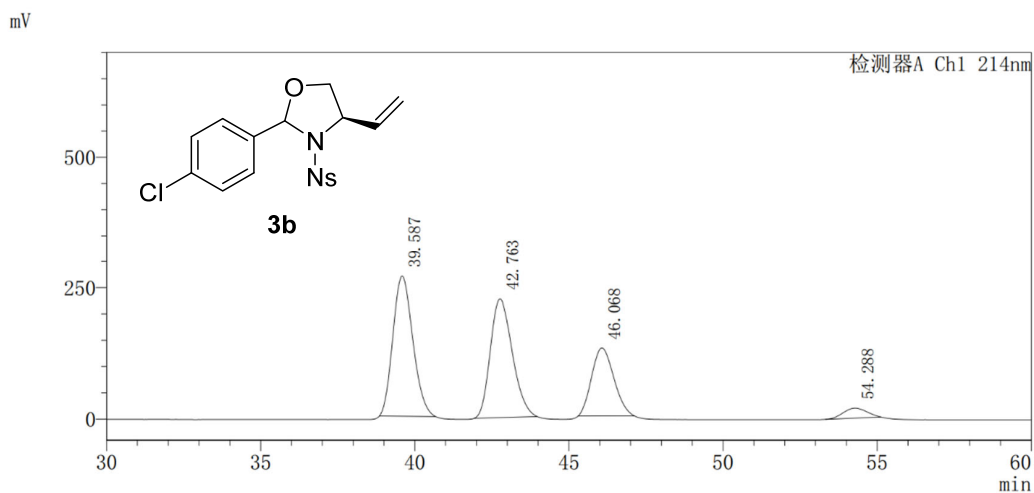

| Peak No.     | R. Time (min) | Peak Area (mV*min) | Percent (%) |
|--------------|---------------|--------------------|-------------|
| 1            | 39.587        | 11954001           | 39.080      |
| 2            | 42.763        | 11164872           | 36.500      |
| 3            | 46.068        | 6459749            | 21.118      |
| 4            | 54.288        | 1009853            | 3.301       |
| <b>Total</b> |               | 30588474           | 100.000     |

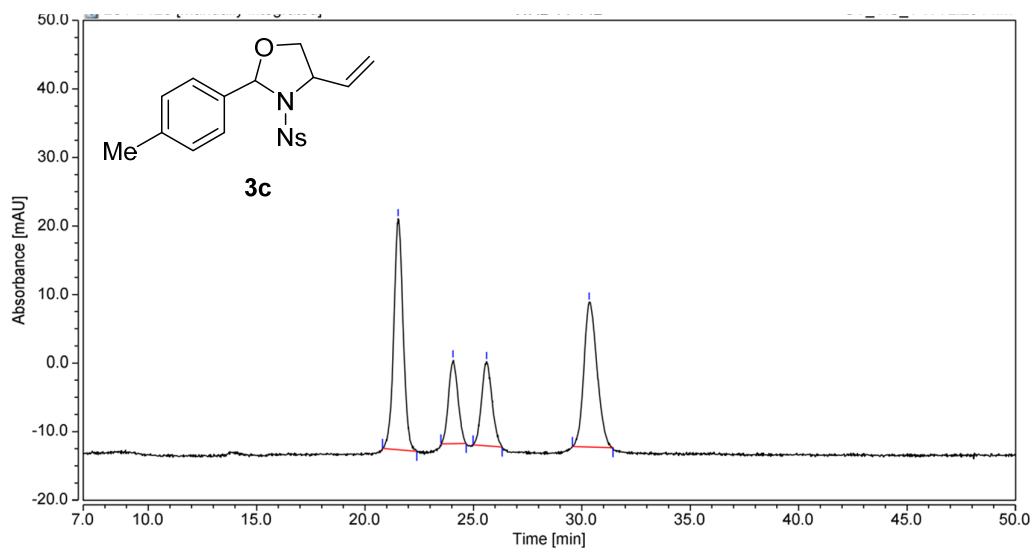

| Peak No.     | R. Time (min) | Peak Area (mAU*min) | Percent (%) |
|--------------|---------------|---------------------|-------------|
| 1            | 21.524        | 16.755              | 36.60       |
| 2            | 24.057        | 6.130               | 13.75       |
| 3            | 25.607        | 6.848               | 15.37       |
| 4            | 30.340        | 14.834              | 34.29       |
| <b>Total</b> |               | 44.567              | 100.000     |

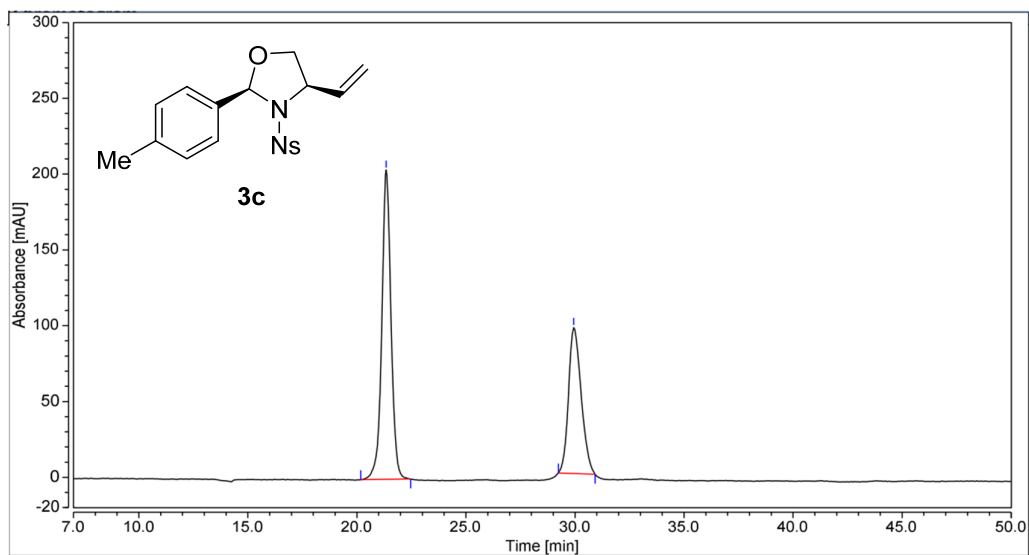

| Peak No.     | R. Time (min) | Peak Area<br>(mAU*min) | Percent (%) |
|--------------|---------------|------------------------|-------------|
| 1            | 21.337        | 100.227                | 60.74       |
| 2            | 29.945        | 64.786                 | 39.26       |
| <b>Total</b> |               | 165.013                | 100         |

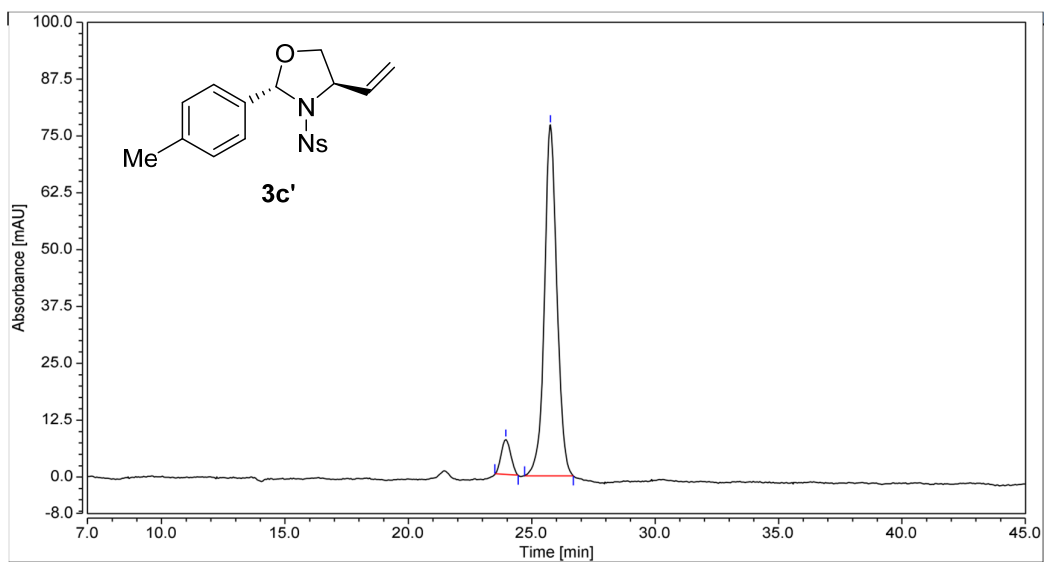

| Peak No.     | R. Time (min) | Peak Area<br>(mAU*min) | Percent (%) |
|--------------|---------------|------------------------|-------------|
| 1            | 23.945        | 3.478                  | 9.20        |
| 2            | 25.753        | 45.127                 | 90.80       |
| <b>Total</b> |               | 48.605                 | 100         |

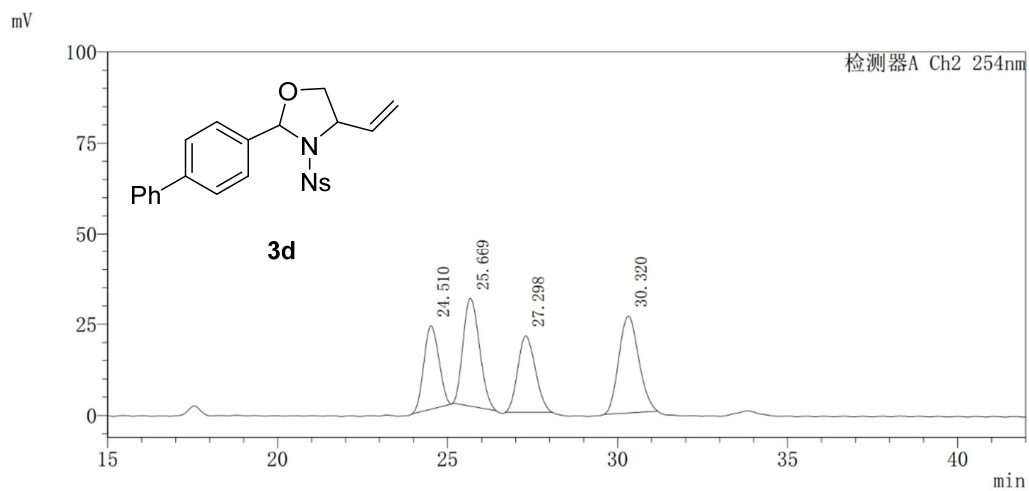

| Peak No.     | R. Time (min) | Peak Area (mV*min) | Percent (%) |
|--------------|---------------|--------------------|-------------|
| 1            | 24.510        | 704199             | 19.900      |
| 2            | 25.669        | 994826             | 28.112      |
| 3            | 27.298        | 755426             | 21.347      |
| 4            | 30.320        | 1084290            | 30.641      |
| <b>Total</b> |               | 3538742            | 100.000     |

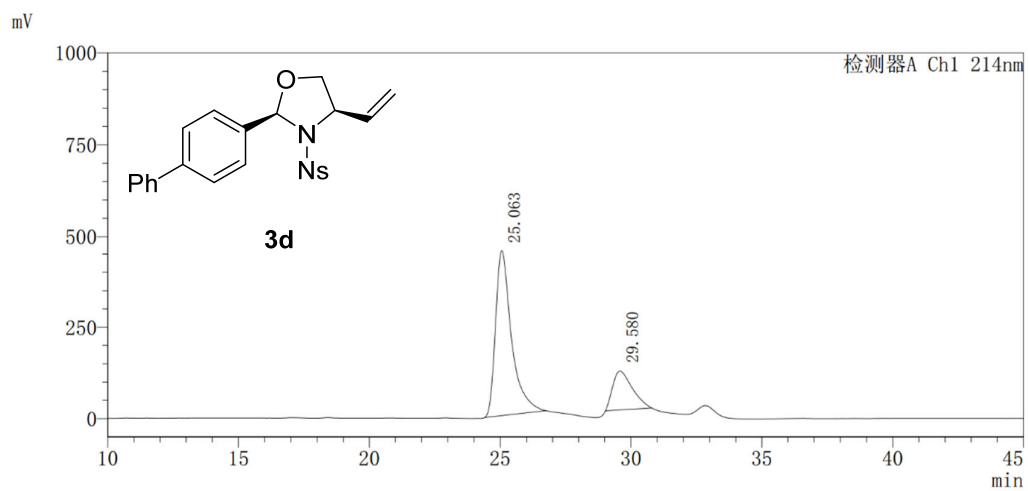

| Peak No.     | R. Time (min) | Peak Area (mV*min) | Percent (%) |
|--------------|---------------|--------------------|-------------|
| 1            | 25.063        | 19100735           | 77.582      |
| 2            | 29.580        | 5519236            | 22.418      |
| <b>Total</b> |               | 24619971           | 100.000     |

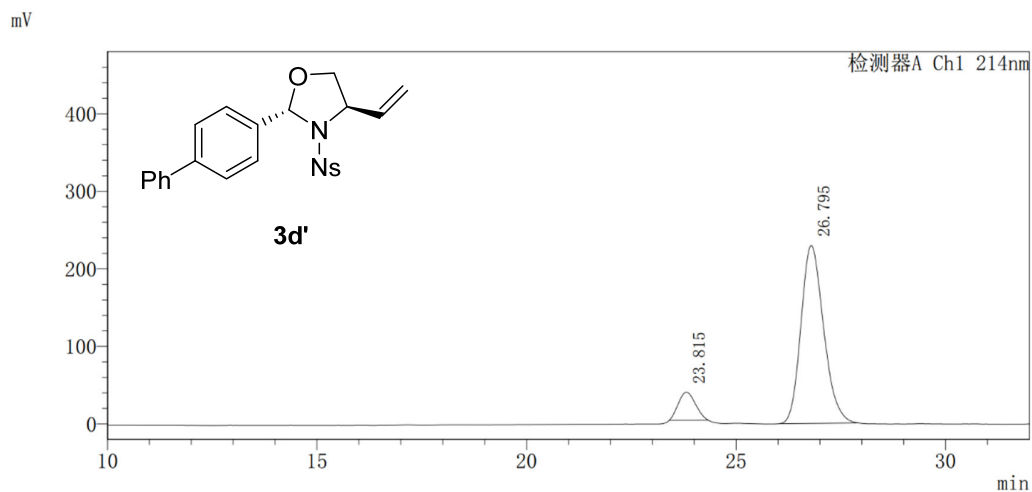

| Peak No.     | R. Time (min) | Peak Area (mV*min) | Percent (%) |
|--------------|---------------|--------------------|-------------|
| 1            | 23.815        | 975158             | 9.981       |
| 2            | 26.795        | 8794048            | 90.018      |
| <b>Total</b> |               | 9769206            | 100.000     |

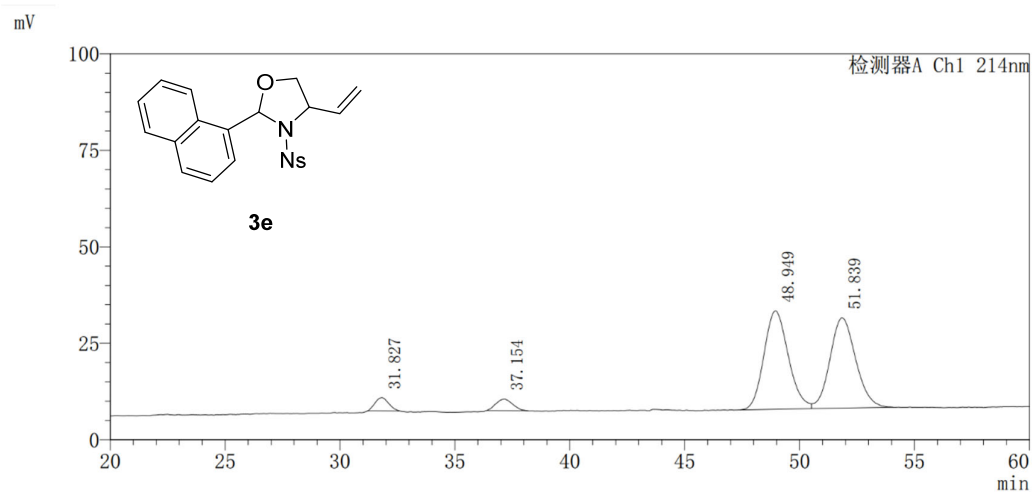

| Peak No.     | R. Time (min) | Peak Area (mV*min) | Percent (%) |
|--------------|---------------|--------------------|-------------|
| 1            | 31.827        | 142559             | 3.561       |
| 2            | 37.154        | 150352             | 3.756       |
| 3            | 48.949        | 1884274            | 47.074      |
| 4            | 51.839        | 1825607            | 45.608      |
| <b>Total</b> |               | 4002792            | 100.000     |



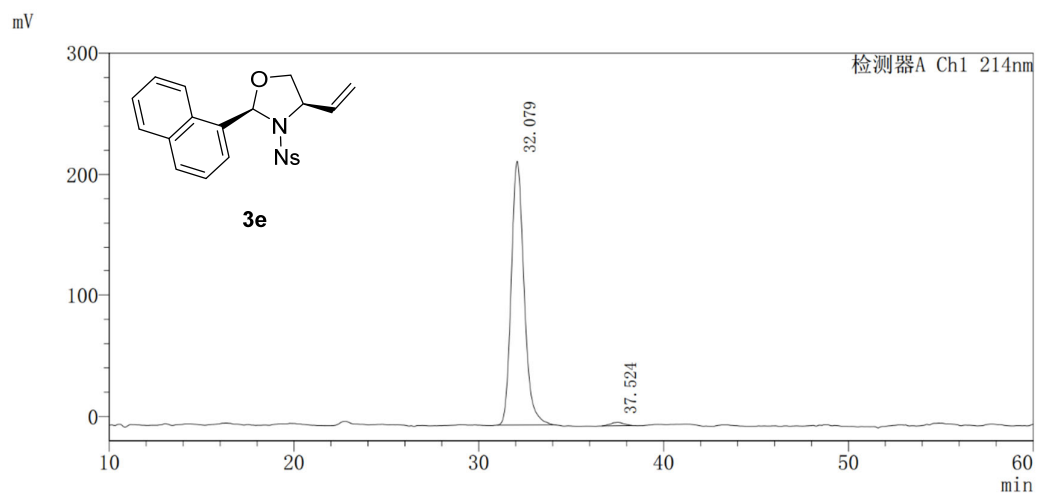

| Peak No.     | R. Time (min) | Peak Area (mV*min) | Percent (%) |
|--------------|---------------|--------------------|-------------|
| 1            | 32.079        | 10530438           | 98.747      |
| 2            | 37.524        | 133640             | 1.253       |
| <b>Total</b> |               | 10664077           | 100.000     |

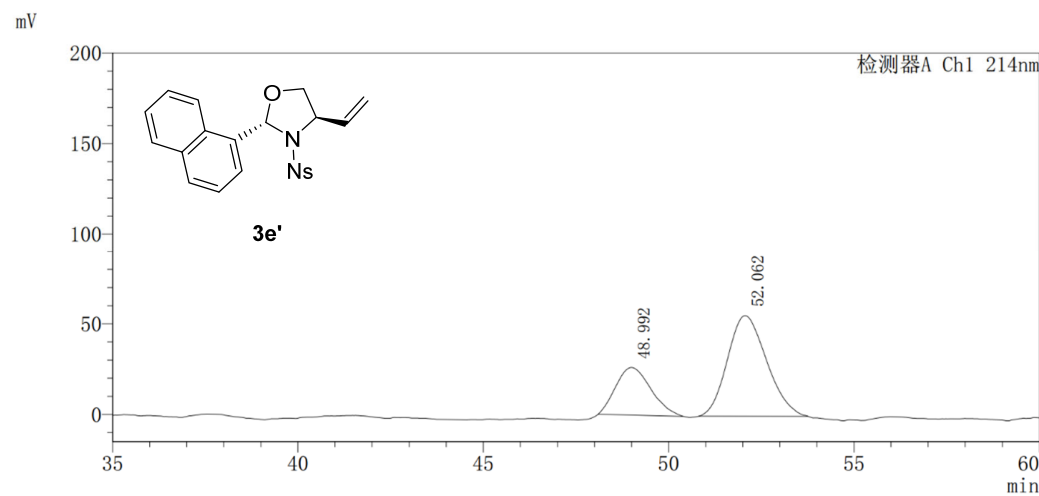

| Peak No.     | R. Time (min) | Peak Area (mV*min) | Percent (%) |
|--------------|---------------|--------------------|-------------|
| 1            | 48.992        | 1731676            | 29.833      |
| 2            | 52.062        | 4072936            | 70.167      |
| <b>Total</b> |               | 5804612            | 100.000     |

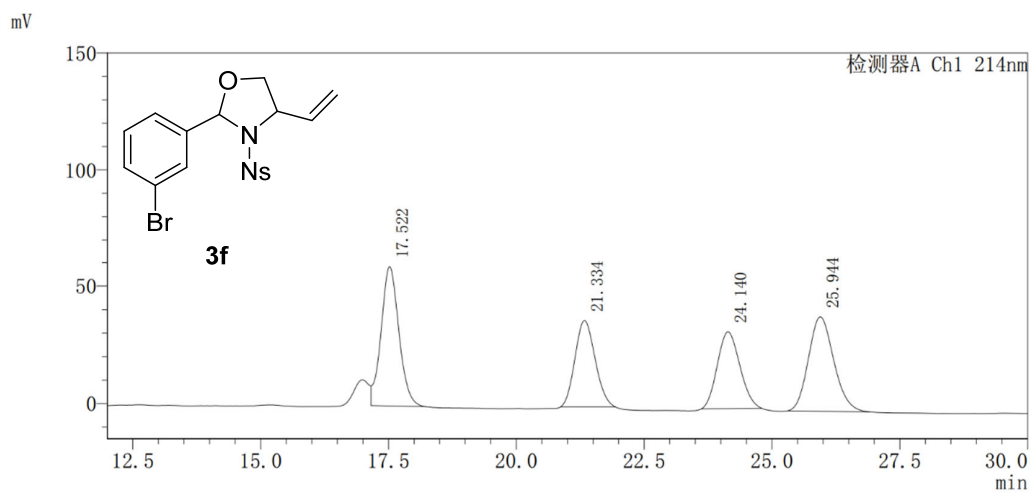

| Peak No.     | R. Time (min) | Peak Area (mV*min) | Percent (%) |
|--------------|---------------|--------------------|-------------|
| 1            | 17.522        | 1435080            | 29.716      |
| 2            | 21.334        | 1004127            | 20.792      |
| 3            | 24.140        | 1003009            | 20.769      |
| 4            | 25.944        | 1387090            | 28.722      |
| <b>Total</b> |               | 4829306            | 100.000     |

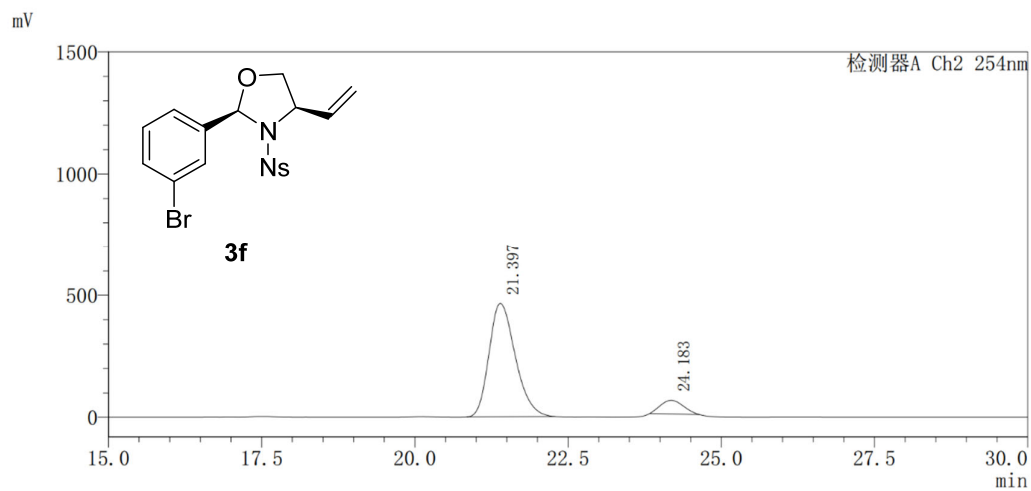

| Peak No.     | R. Time (min) | Peak Area (mV*min) | Percent (%) |
|--------------|---------------|--------------------|-------------|
| 1            | 21.397        | 13839602           | 90.482      |
| 2            | 24.183        | 1455838            | 9.518       |
| <b>Total</b> |               | 15295440           | 100.000     |

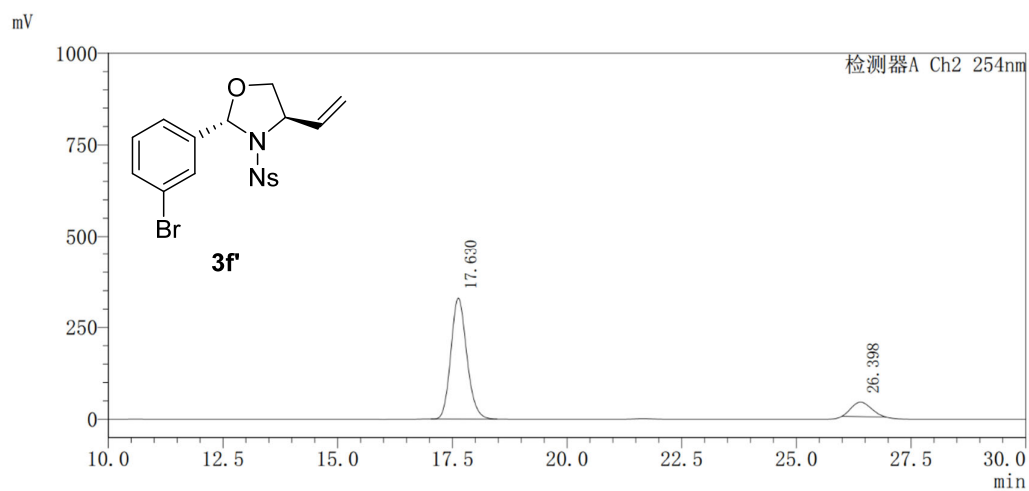

| Peak No.     | R. Time (min) | Peak Area (mV*min) | Percent (%) |
|--------------|---------------|--------------------|-------------|
| 1            | 17.630        | 7960221            | 87.138      |
| 2            | 26.398        | 1174972            | 12.862      |
| <b>Total</b> |               | 9135193            | 100.000     |

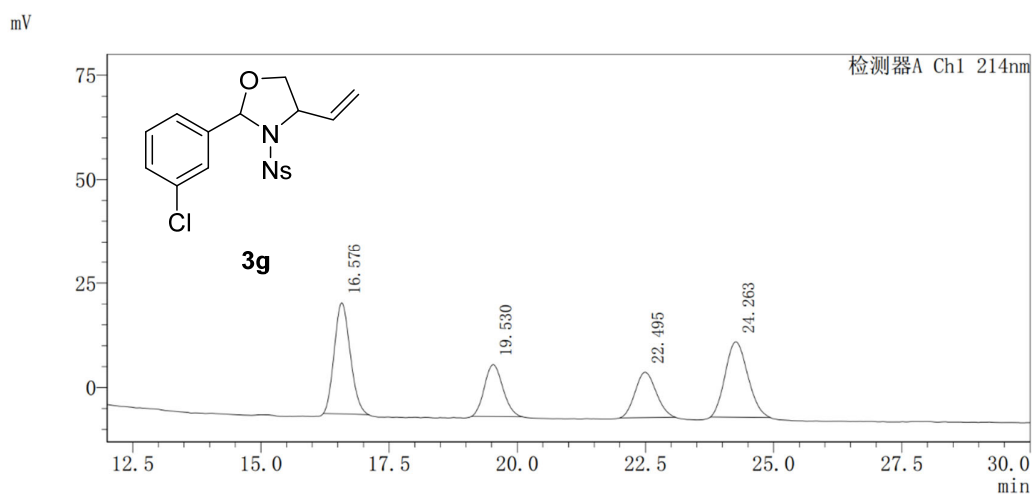

| Peak No.     | R. Time (min) | Peak Area (mV*min) | Percent (%) |
|--------------|---------------|--------------------|-------------|
| 1            | 16.576        | 576484             | 32.894      |
| 2            | 19.530        | 312817             | 17.849      |
| 3            | 22.495        | 310431             | 17.713      |
| 4            | 24.263        | 552821             | 31.544      |
| <b>Total</b> |               | 1752554            | 100.000     |

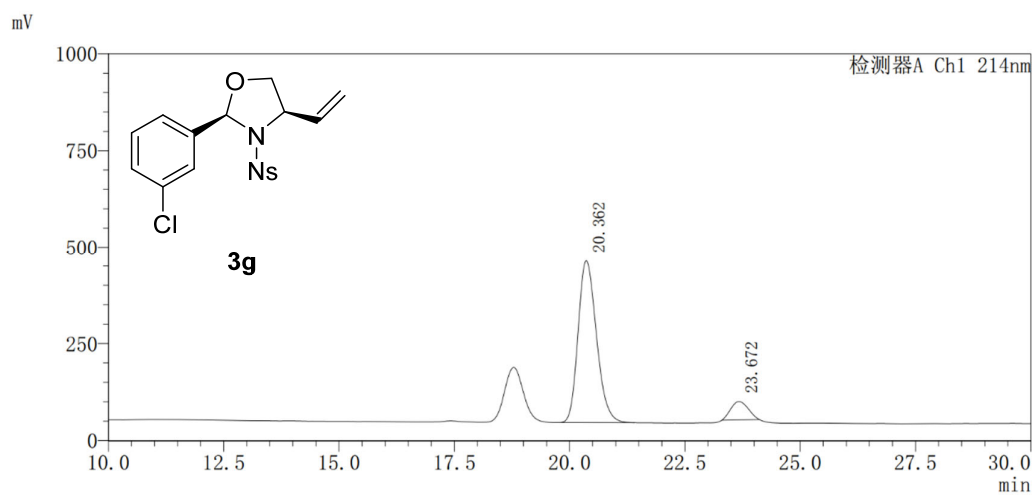

| Peak No.     | R. Time (min) | Peak Area (mV*min) | Percent (%) |
|--------------|---------------|--------------------|-------------|
| 1            | 20.362        | 11548122           | 90.231      |
| 2            | 23.672        | 1250333            | 9.769       |
| <b>Total</b> |               | 12798455           | 100.000     |

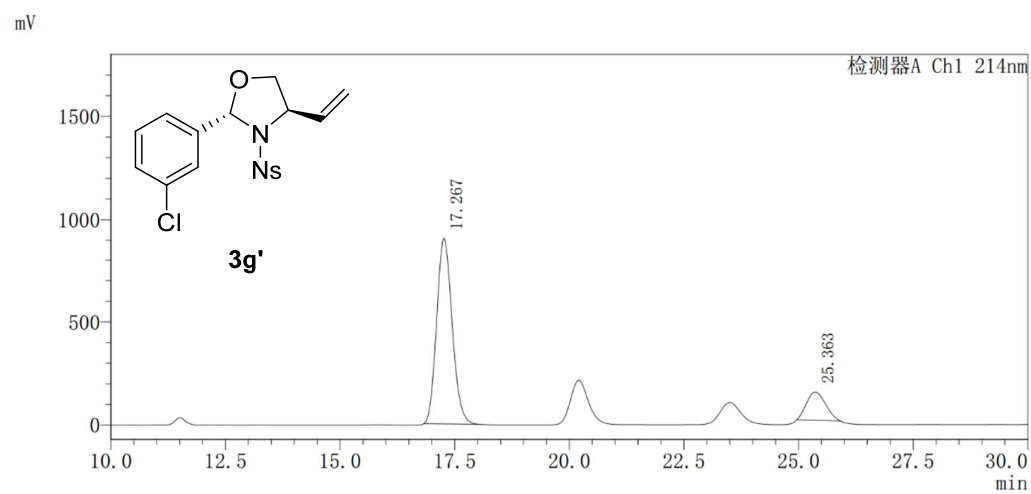

| Peak No.     | R. Time (min) | Peak Area (mV*min) | Percent (%) |
|--------------|---------------|--------------------|-------------|
| 1            | 17.267        | 21150588           | 84.228      |
| 2            | 25.363        | 3960574            | 15.772      |
| <b>Total</b> |               | 25111163           | 100.000     |

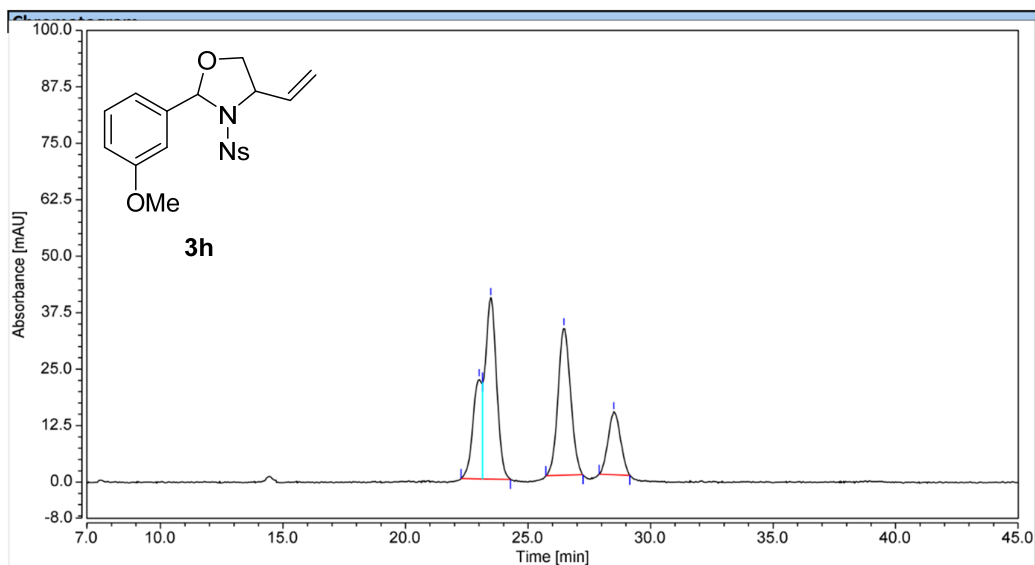

| Peak No.     | R. Time (min) | Peak Area<br>(mAU*min) | Percent (%)    |
|--------------|---------------|------------------------|----------------|
| 1            | 23.012        | 9.484                  | 15.21          |
| 2            | 23.485        | 21.466                 | 35.68          |
| 3            | 26.465        | 19.433                 | 34.21          |
| 4            | 28.505        | 8.139                  | 14.91          |
| <b>Total</b> |               | <b>58.521</b>          | <b>100.000</b> |

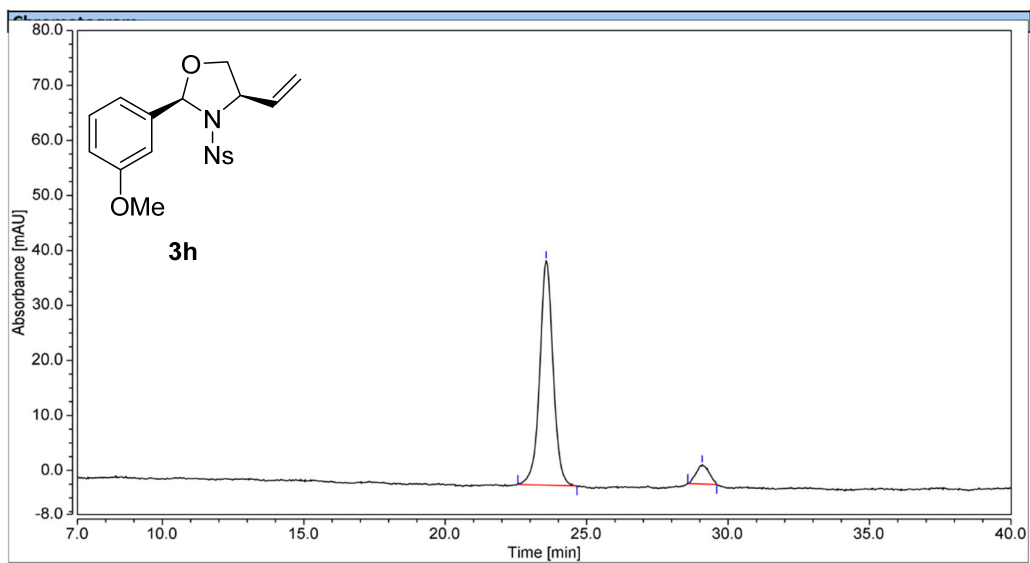

| Peak No.     | R. Time (min) | Peak Area<br>(mAU*min) | Percent (%)    |
|--------------|---------------|------------------------|----------------|
| 1            | 23.566        | 22.356                 | 92.39          |
| 2            | 29.086        | 1.841                  | 7.61           |
| <b>Total</b> |               | <b>24.197</b>          | <b>100.000</b> |

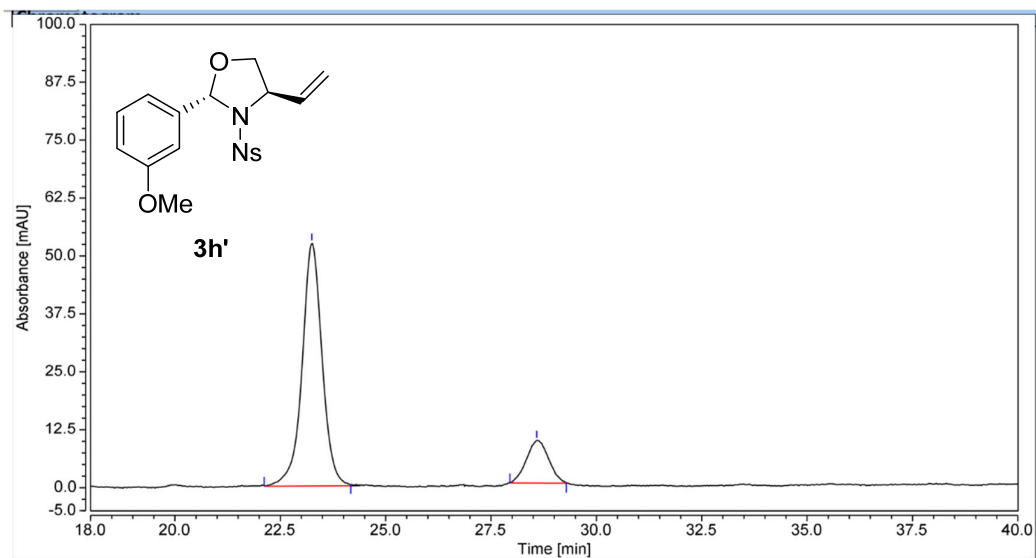

| Peak No.     | R. Time (min) | Peak Area<br>(mAU*min) | Percent (%) |
|--------------|---------------|------------------------|-------------|
| 1            | 23.246        | 28.958                 | 83.79       |
| 2            | 28.586        | 5.604                  | 16.21       |
| <b>Total</b> |               | 34.562                 | 100.000     |

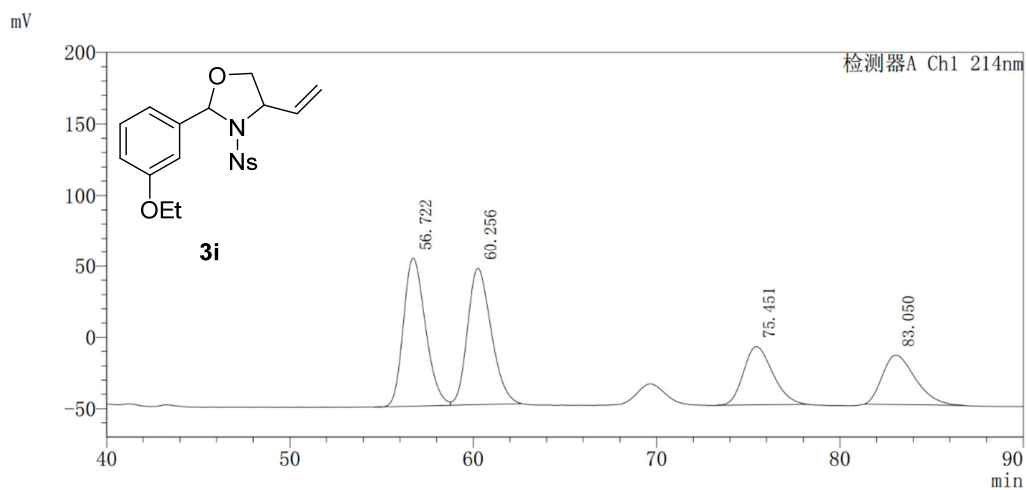

| Peak No.     | R. Time (min) | Peak Area (mV*min) | Percent (%) |
|--------------|---------------|--------------------|-------------|
| 1            | 56.722        | 8718047            | 33.238      |
| 2            | 60.256        | 8613710            | 32.840      |
| 3            | 75.451        | 4553943            | 17.362      |
| 4            | 83.050        | 4343843            | 16.561      |
| <b>Total</b> |               | 26229542           | 100.000     |

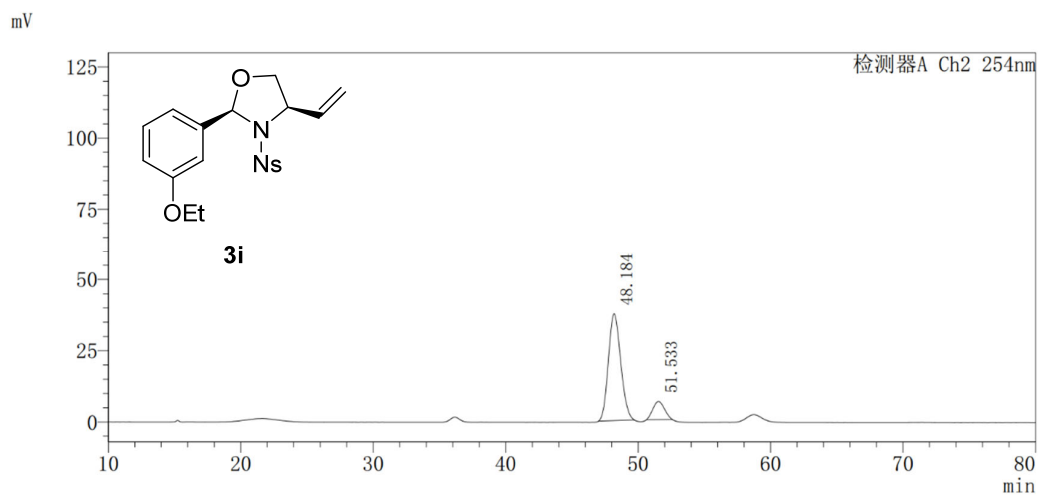

| Peak No.     | R. Time (min) | Peak Area (mV*min) | Percent (%) |
|--------------|---------------|--------------------|-------------|
| 1            | 48.184        | 2425553            | 86.347      |
| 2            | 51.533        | 383534             | 13.653      |
| <b>Total</b> |               | 2809087            | 100.000     |

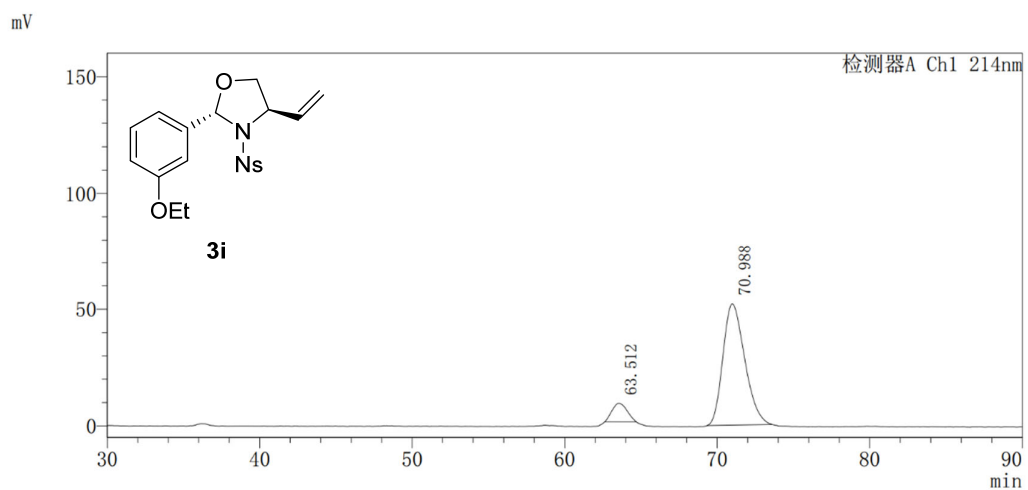

| Peak No.     | R. Time (min) | Peak Area (mV*min) | Percent (%) |
|--------------|---------------|--------------------|-------------|
| 1            | 63.512        | 551111             | 9.653       |
| 2            | 70.988        | 5158395            | 90.347      |
| <b>Total</b> |               | 5709507            | 100.000     |

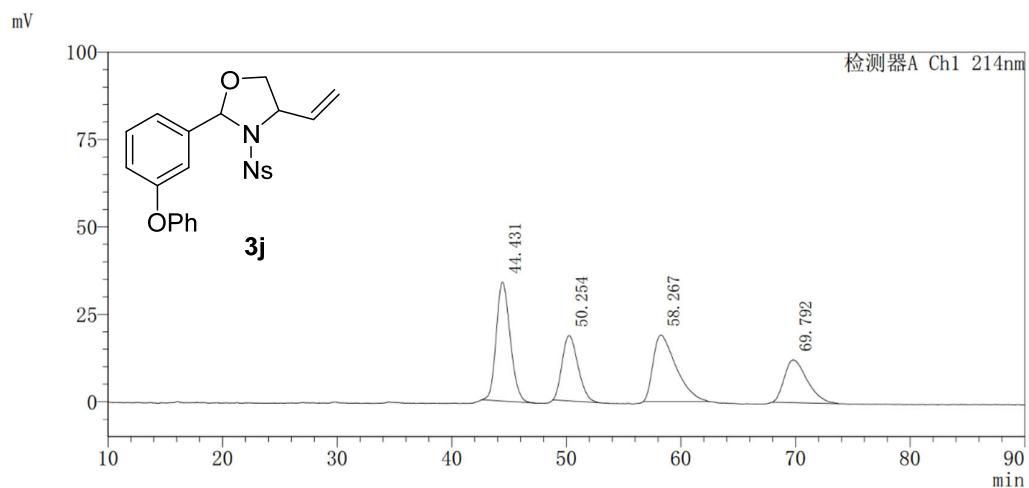

| Peak No.     | R. Time (min) | Peak Area (mV*min) | Percent (%) |
|--------------|---------------|--------------------|-------------|
| 1            | 44.431        | 2886227            | 31.910      |
| 2            | 50.254        | 1800761            | 19.909      |
| 3            | 58.267        | 2655459            | 29.359      |
| 4            | 69.792        | 1702331            | 18.821      |
| <b>Total</b> |               | 9044778            | 100.000     |

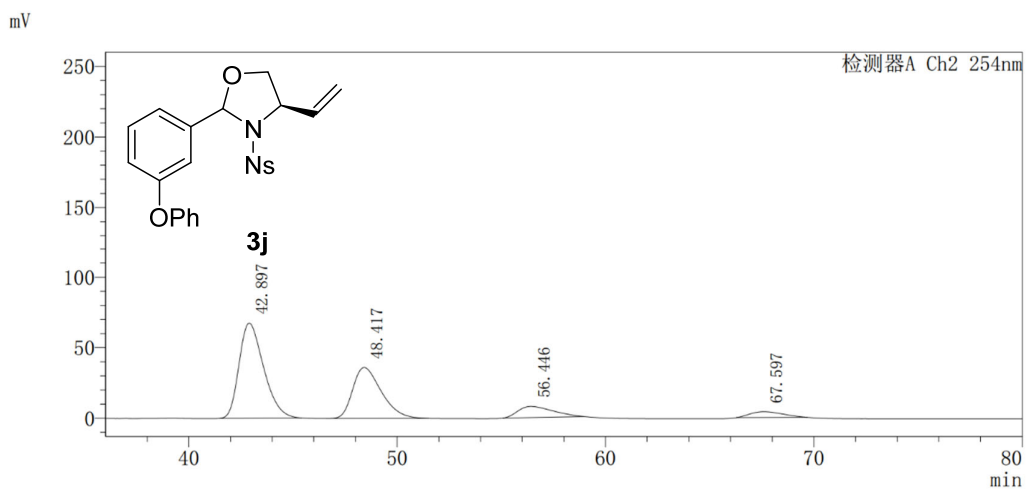

| Peak No.     | R. Time (min) | Peak Area (mAU*min) | Percent (%) |
|--------------|---------------|---------------------|-------------|
| 1            | 42.897        | 5519302             | 53.380      |
| 2            | 48.417        | 3445528             | 33.324      |
| 3            | 56.446        | 921351              | 8.911       |
| 4            | 67.597        | 453378              | 4.385       |
| <b>Total</b> |               | 10339559            | 100.000     |



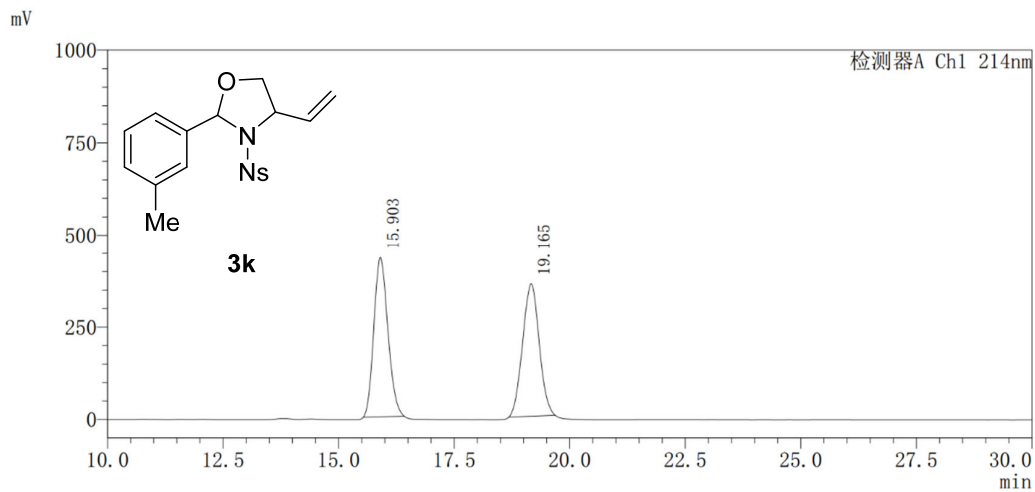

| Peak No.     | R. Time (min) | Peak Area (mV*min) | Percent (%) |
|--------------|---------------|--------------------|-------------|
| 1            | 15.903        | 9136961            | 50.489      |
| 2            | 19.165        | 8959816            | 49.511      |
| <b>Total</b> |               | 18096777           | 100.000     |

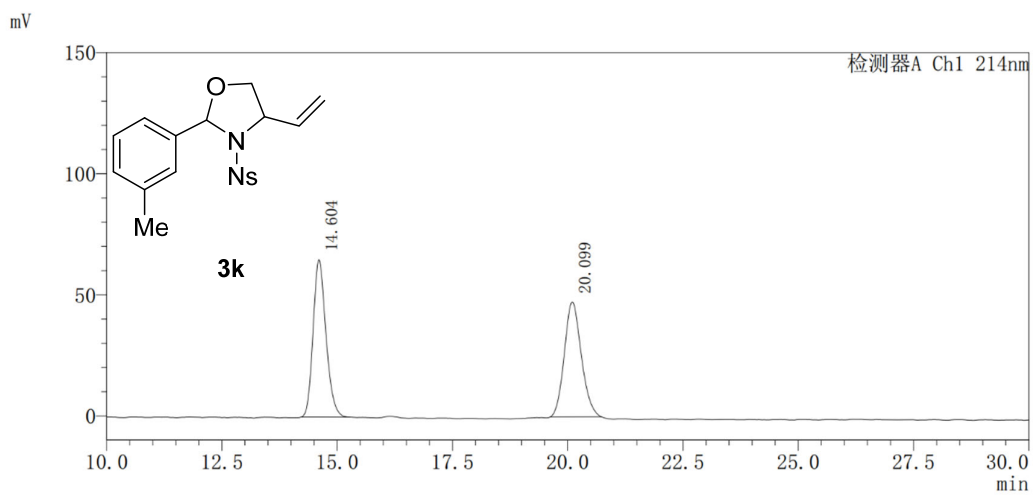

| Peak No.     | R. Time (min) | Peak Area (mV*min) | Percent (%) |
|--------------|---------------|--------------------|-------------|
| 1            | 14.604        | 1264614            | 50.954      |
| 2            | 20.099        | 1217248            | 49.046      |
| <b>Total</b> |               | 2481861            | 100.000     |

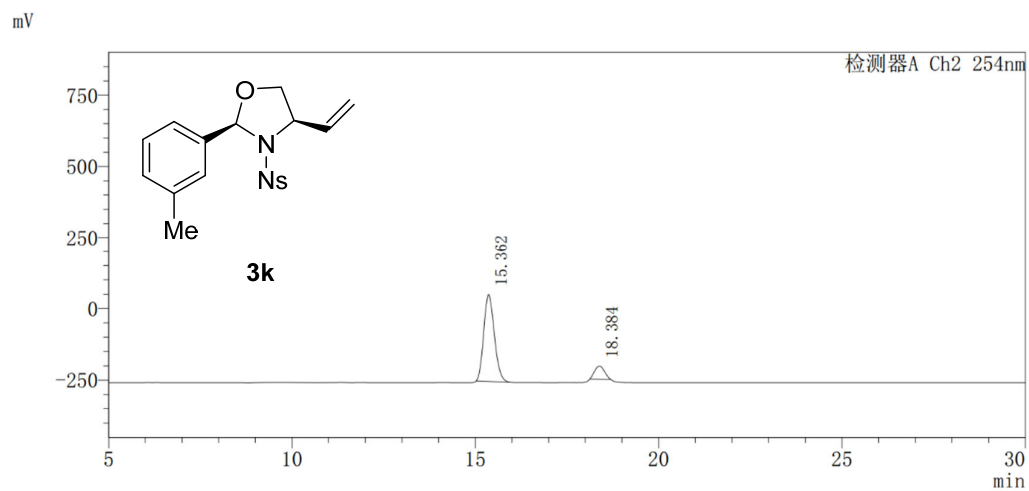

| Peak No.     | R. Time (min) | Peak Area (mV*min) | Percent (%) |
|--------------|---------------|--------------------|-------------|
| 1            | 15.362        | 6113905            | 87.668      |
| 2            | 18.384        | 860035             | 12.332      |
| <b>Total</b> |               | 6973940            | 100.000     |

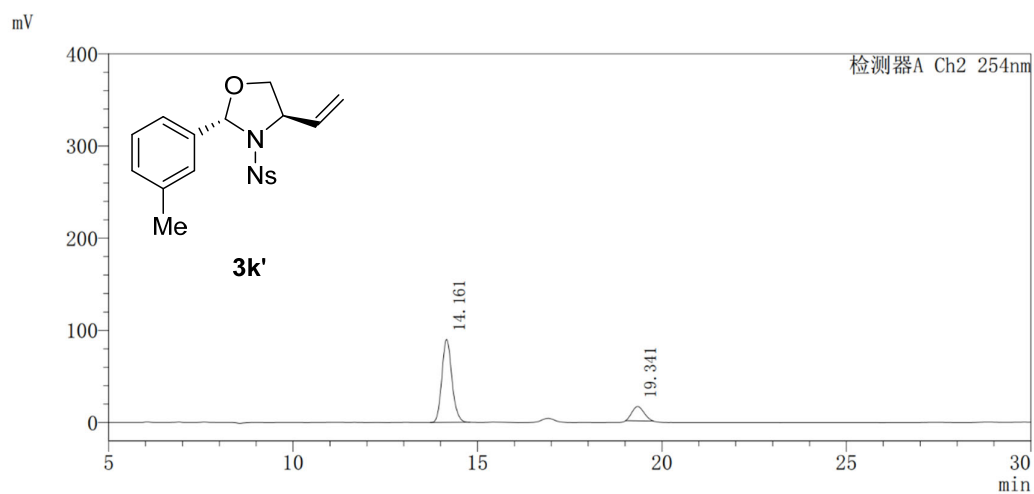

| Peak No.     | R. Time (min) | Peak Area (mV*min) | Percent (%) |
|--------------|---------------|--------------------|-------------|
| 1            | 14.161        | 1713244            | 83.017      |
| 2            | 19.341        | 350476             | 16.983      |
| <b>Total</b> |               | 2063720            | 100.000     |

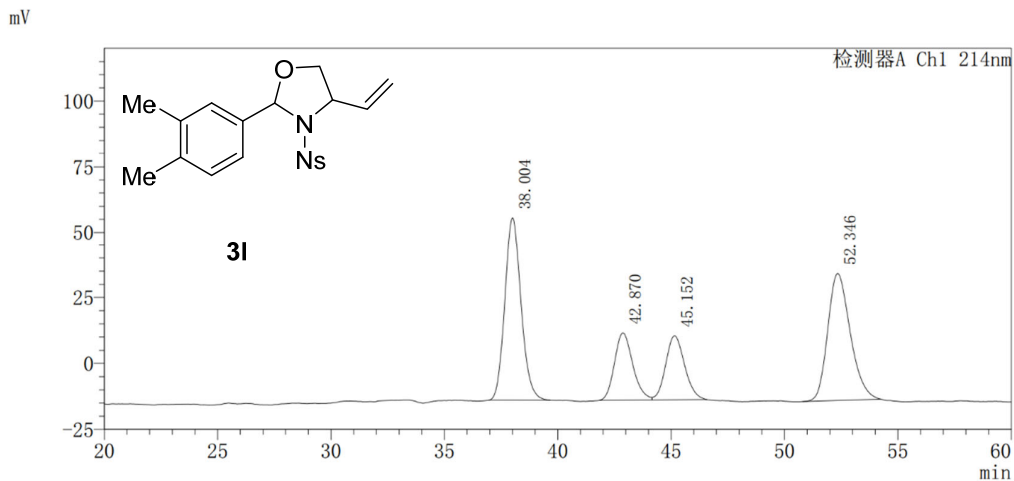

| Peak No.     | R. Time (min) | Peak Area<br>(mAU*min) | Percent (%) |
|--------------|---------------|------------------------|-------------|
| 1            | 38.004        | 3449617                | 35.892      |
| 2            | 42.870        | 1429065                | 14.869      |
| 3            | 45.152        | 1406736                | 14.636      |
| 4            | 52.346        | 3325763                | 34.603      |
| <b>Total</b> |               | 9611181                | 100.000     |

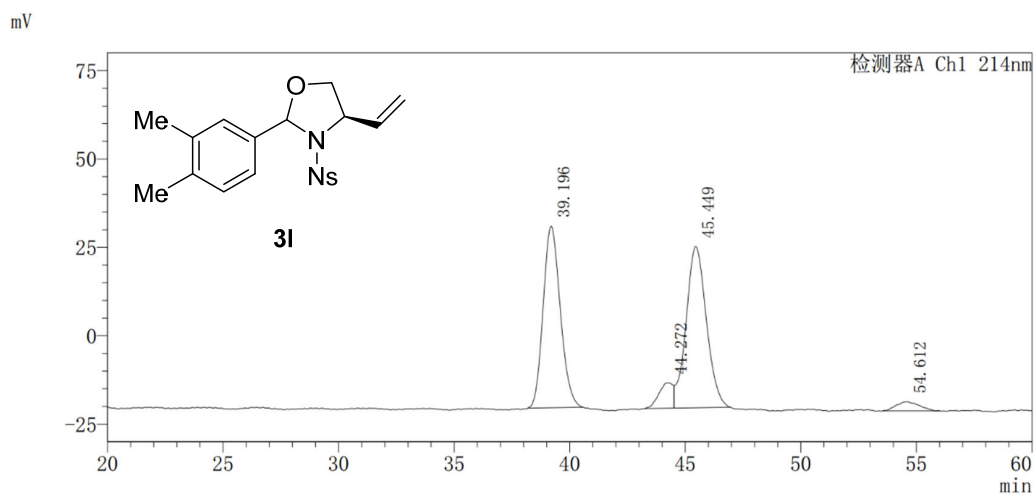

| Peak No.     | R. Time (min) | Peak Area (mV*min) | Percent (%) |
|--------------|---------------|--------------------|-------------|
| 1            | 39.196        | 2643867            | 44.656      |
| 2            | 44.272        | 306555             | 5.178       |
| 3            | 45.449        | 2793066            | 47.176      |
| 4            | 54.612        | 177080             | 2.991       |
| <b>Total</b> |               | 5920568            | 100.000     |

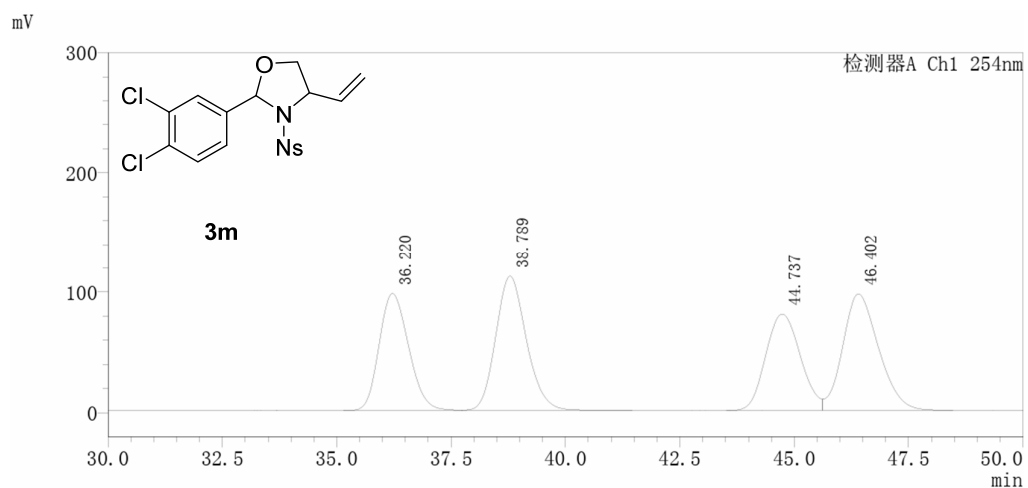

| Peak No.     | R. Time (min) | Peak Area (mV*min) | Percent (%) |
|--------------|---------------|--------------------|-------------|
| 1            | 36.220        | 4302473            | 22.744      |
| 2            | 38.789        | 5167317            | 27.316      |
| 3            | 44.737        | 4199722            | 22.201      |
| 4            | 46.402        | 5247190            | 27.738      |
| <b>Total</b> |               | 18916701           | 100.000     |

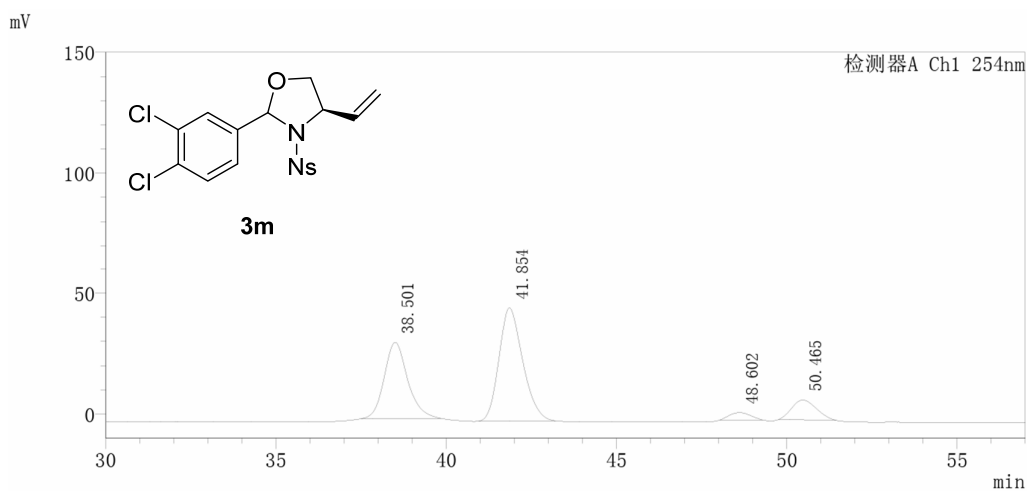

| Peak No.     | R. Time (min) | Peak Area (mV*min) | Percent (%) |
|--------------|---------------|--------------------|-------------|
| 1            | 38.501        | 1504615            | 34.933      |
| 2            | 41.854        | 2262281            | 52.523      |
| 3            | 48.602        | 129457             | 3.006       |
| 4            | 50.465        | 410846             | 9.539       |
| <b>Total</b> |               | 4307200            | 100.000     |

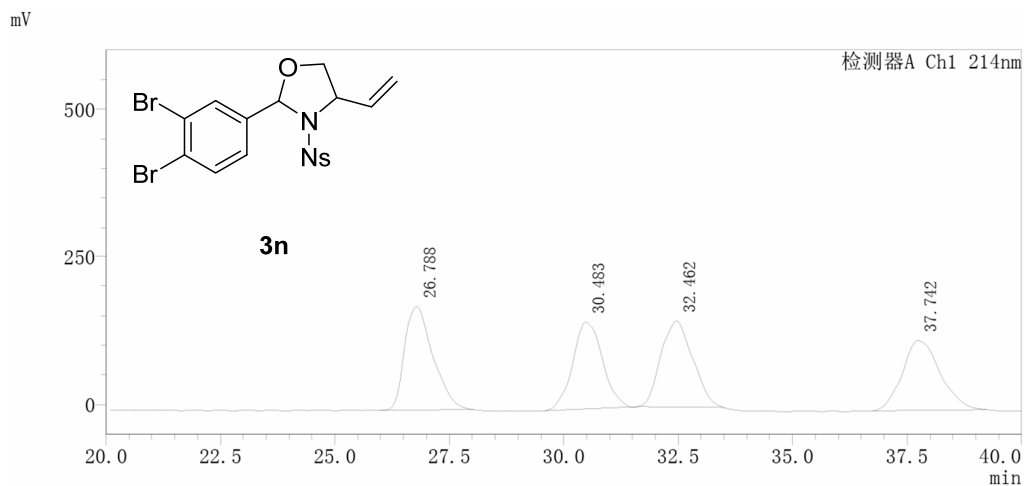

| Peak No.     | R. Time (min) | Peak Area (mV*min) | Percent (%) |
|--------------|---------------|--------------------|-------------|
| 1            | 26.788        | 7500028            | 26.962      |
| 2            | 30.483        | 6589142            | 23.688      |
| 3            | 32.462        | 6990842            | 25.132      |
| 4            | 37.742        | 6736615            | 24.218      |
| <b>Total</b> |               | 27816627           | 100.000     |

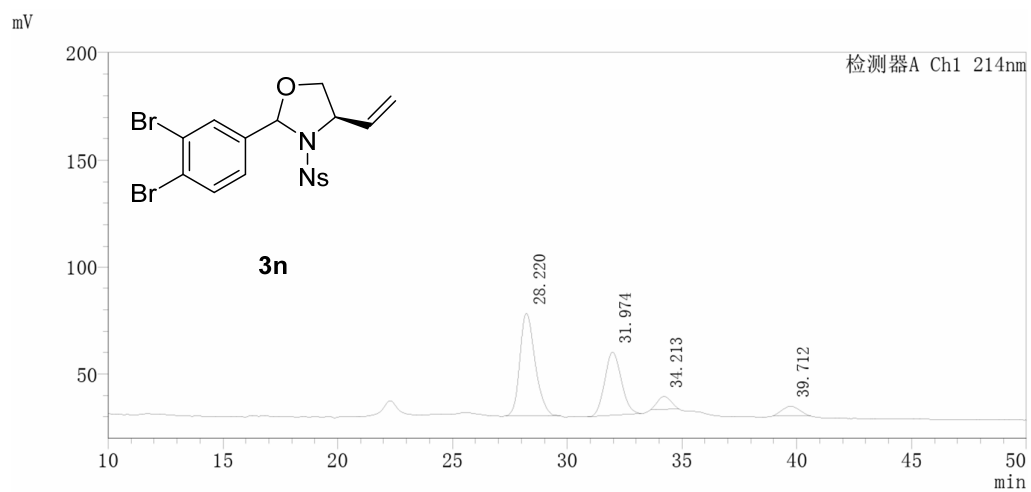

| Peak No.     | R. Time (min) | Peak Area (mV*min) | Percent (%) |
|--------------|---------------|--------------------|-------------|
| 1            | 28.220        | 2215831            | 53.194      |
| 2            | 31.974        | 1472320            | 35.345      |
| 3            | 34.213        | 242395             | 5.819       |
| 4            | 39.712        | 234984             | 5.641       |
| <b>Total</b> |               | 4165530            | 100.000     |

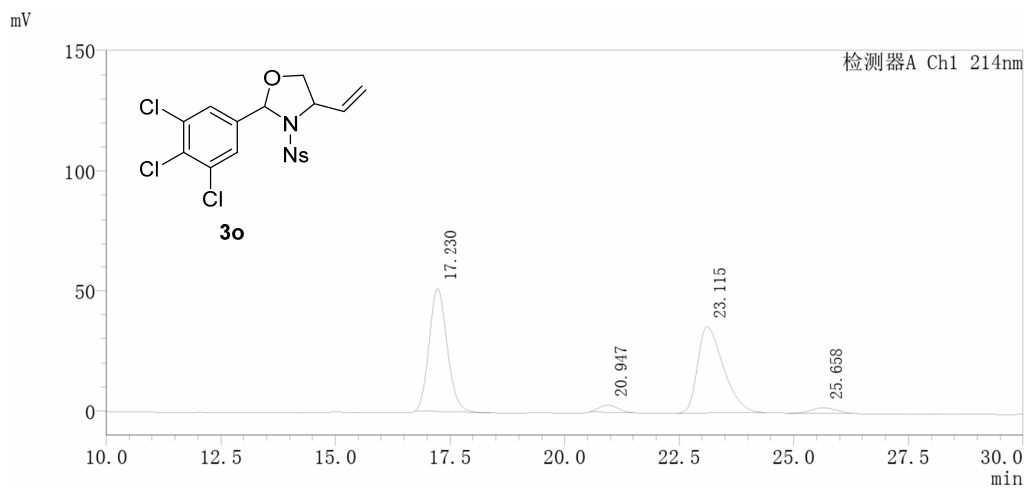

| Peak No.     | R. Time (min) | Peak Area (mV*min) | Percent (%) |
|--------------|---------------|--------------------|-------------|
| 1            | 17.230        | 1392884            | 47.040      |
| 2            | 20.947        | 85491              | 2.887       |
| 3            | 23.115        | 1403079            | 47.385      |
| 4            | 25.658        | 79585              | 2.688       |
| <b>Total</b> |               | 2961039            | 100.000     |

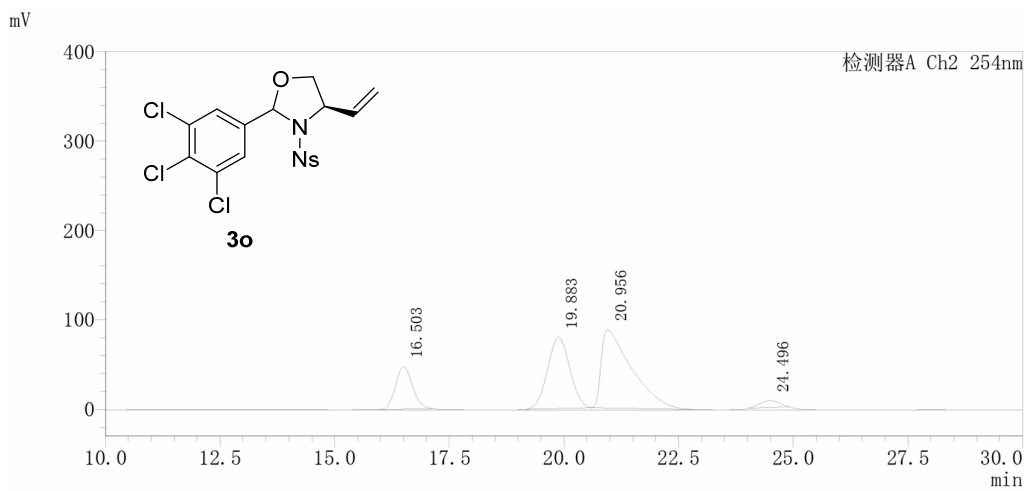

| Peak No.     | R. Time (min) | Peak Area (mV*min) | Percent (%) |
|--------------|---------------|--------------------|-------------|
| 1            | 16.503        | 1207558            | 14.961      |
| 2            | 19.883        | 2664472            | 33.011      |
| 3            | 20.956        | 3976378            | 49.264      |
| 4            | 24.496        | 223123             | 2.764       |
| <b>Total</b> |               | 8071531            | 100.000     |

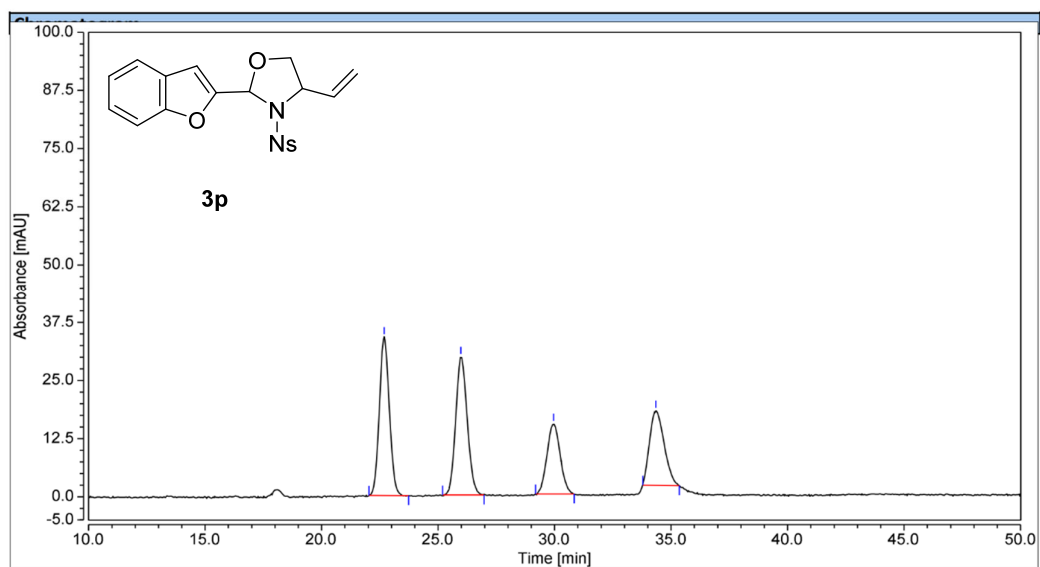

| Peak No.     | R. Time (min) | Peak Area<br>(mAU*min) | Percent (%) |
|--------------|---------------|------------------------|-------------|
| 1            | 22.685        | 16.958                 | 30.50       |
| 2            | 25.979        | 17.106                 | 30.76       |
| 3            | 29.952        | 9.891                  | 17.79       |
| 4            | 34.345        | 11.653                 | 20.96       |
| <b>Total</b> |               | 55.608                 | 100.000     |

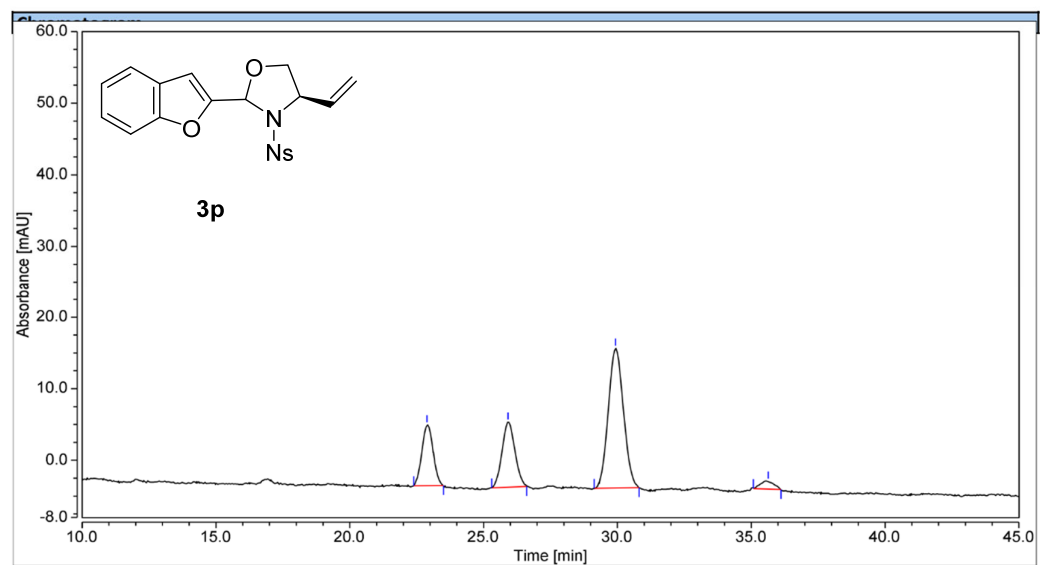

| Peak No. | R. Time (min) | Peak Area<br>(mAU*min) | Percent (%) |
|----------|---------------|------------------------|-------------|
| 1        | 22.886        | 4.089                  | 18.06       |
| 2        | 25.913        | 5.111                  | 22.58       |
| 3        | 29.926        | 12.791                 | 56.51       |
| 4        | 34.639        | 0.645                  | 2.85        |

Total

22.635

100.000

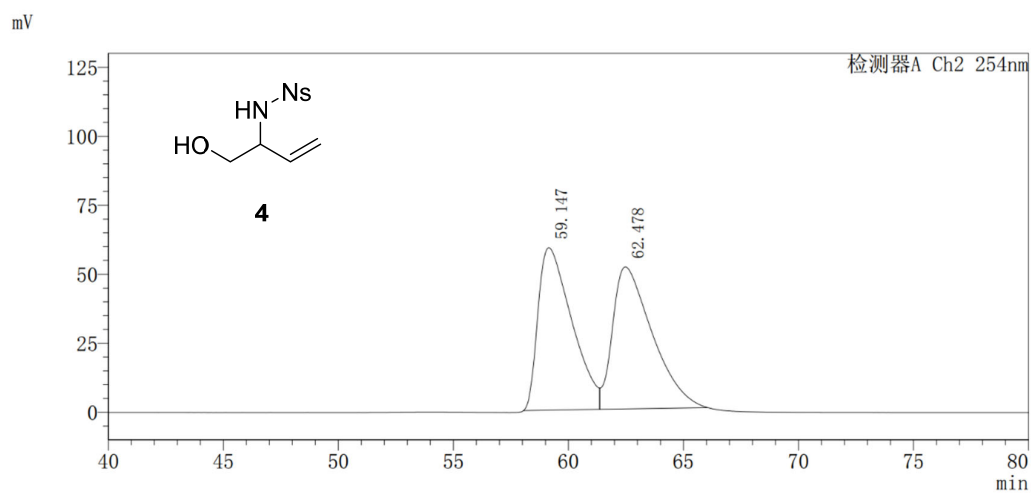

| Peak No. | R. Time (min) | Peak Area (mV *min) | Percent (%) |
|----------|---------------|---------------------|-------------|
| 1        | 59.147        | 6009579             | 49.280      |
| 2        | 62.478        | 6185224             | 50.720      |
| Total    |               | 12194803            | 100.000     |

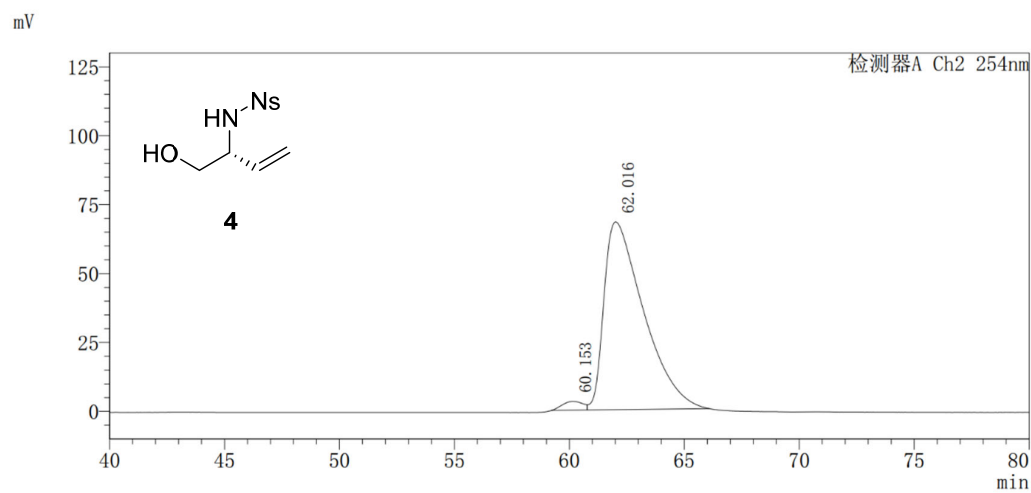

| Peak No. | R. Time (min) | Peak Area (mV *min) | Percent (%) |
|----------|---------------|---------------------|-------------|
| 1        | 60.153        | 200264              | 2.386       |
| 2        | 62.016        | 8193184             | 97.614      |
| Total    |               | 8393448             | 100.000     |



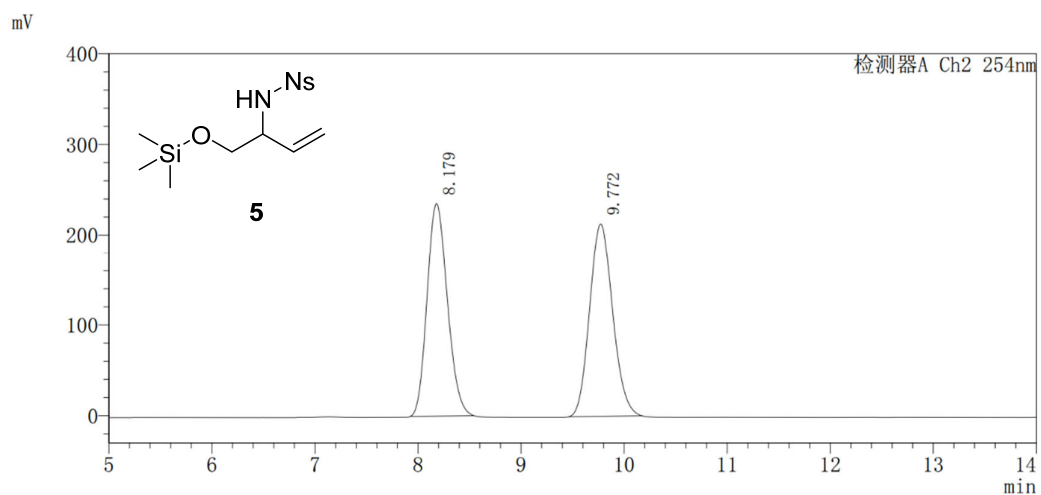

| Peak No.     | R. Time (min) | Peak Area (mV *min) | Percent (%)    |
|--------------|---------------|---------------------|----------------|
| 1            | 8.179         | 3218288             | 49.307         |
| 2            | 9.772         | 3308794             | 50.693         |
| <b>Total</b> |               | <b>6527082</b>      | <b>100.000</b> |

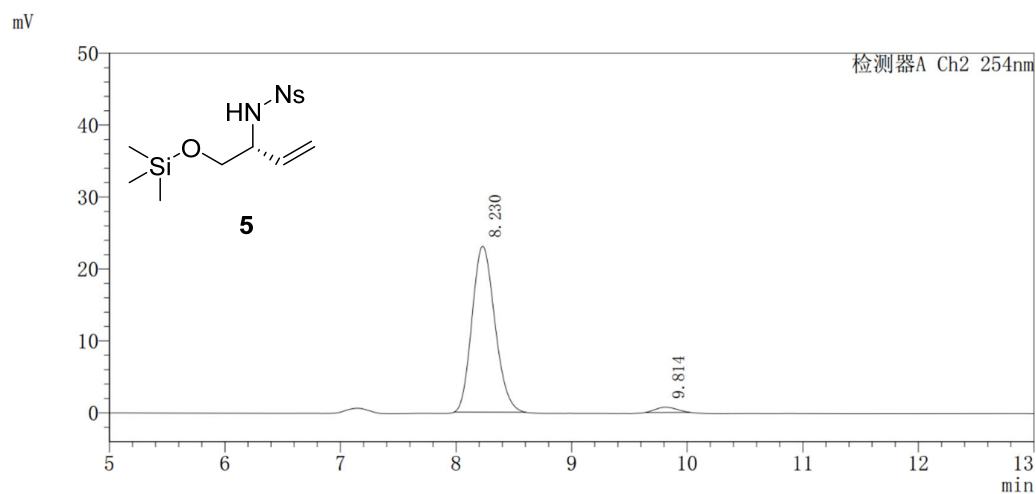

| Peak No.     | R. Time (min) | Peak Area (mV *min) | Percent (%)    |
|--------------|---------------|---------------------|----------------|
| 1            | 8.230         | 8.230               | 97.144         |
| 2            | 9.814         | 9.814               | 2.856          |
| <b>Total</b> |               | <b>8.230</b>        | <b>100.000</b> |

## 9. References

- [1] (a) N. Gao, X.-W. Guo, S.-C. Zheng, W.-K. Yang, X.-M. Zhao, *Tetrahedron* **2012**, 68, 9413.  
 (b) M. Zhang, M. Zhao, P. Zheng, H. Zhang, X. Zhao, *J. Fluorine Chem.* **2016**, 189, 13.  
 [2] L. Marin, S. Jerhaoui, E. Kolodziej, R. Guillot, V. Gandon, F. Colobert, E. Schulz, J.

Wencel-Delord, D. Leboeuf, *Adv. Synth. Catal.* **2021**, 363, 4277.

[3] N. Bodineau, J.-M. Mattali, V. Thimokhin, K. Handoo, J. C. Négrel, M. Chanon, *Org. Lett.* **2000**, 2, 2303.

[4] F. Tato, V. Reboul, P. Metzner. *J. Org. Chem.* **2008**, 73, 7837.
